# Supplementary material for: Copper-catalyzed oxidative selective cyclization/C–N cross-coupling of two tryptamines to access 3a-tryptamine-pyrroloindolines
Source: Royal Society of Chemistry journal article supplement (doi:10.1039/d2qo01936a), 2022-12-21

# Copper-Catalyzed Oxidative Selective Cyclization/C-N Cross-Coupling of Two Tryptamines to Access 3a-Tryptamine-Pyrroloindolines

Hai Ren<sup>a,b,\*</sup>, Ying-Ai Wu<sup>a,b</sup>, Jun-Rong Song<sup>a,b</sup>, Wei Wu<sup>a,b</sup>, Xiaoyan Yang<sup>c</sup>, Jun Shi<sup>a,b</sup>,  
Wei-Dong Pan<sup>a,b</sup>

<sup>a</sup> State Key Laboratory of Functions and Applications of Medicinal Plants, Guizhou Medical University,  
Guiyang, China

<sup>b</sup> The Key Laboratory of Chemistry for Natural Products of Guizhou Province and Chinese Academy of  
Science, Guiyang, China

<sup>c</sup> Department of Pediatrics, The Affiliated Hospital of Guizhou Medical University, Guiyang, Guizhou, China

E-mail: [renh0206@163.com](mailto:renh0206@163.com) / [renh@gzcnp.cn](mailto:renh@gzcnp.cn)

## Supporting Information

### Content

|                                                                                                        |             |
|--------------------------------------------------------------------------------------------------------|-------------|
| <b>1. General information .....</b>                                                                    | <b>S-2</b>  |
| <b>2. Preparations of tryptamine substrates.....</b>                                                   | <b>S-3</b>  |
| <b>3. Optimization of the reaction conditions.....</b>                                                 | <b>S-14</b> |
| <b>4. Mechanistic studies .....</b>                                                                    | <b>S-18</b> |
| <b>5. General Procedure for 3a-tryptamine-pyrroloindolines and product<br/>characterizations .....</b> | <b>S-24</b> |
| <b>6 Scale-up experiments .....</b>                                                                    | <b>S-38</b> |
| <b>7 References .....</b>                                                                              | <b>S-39</b> |
| <b>8 <sup>1</sup>H NMR, <sup>13</sup>C NMR and <sup>19</sup>F NMR Spectra of compounds .....</b>       | <b>S-40</b> |

## 1. General information

Unless stated, otherwise all reactions were carried out under an atmosphere of nitrogen using standard Schlenk techniques. All the reactions that need to be heated, the oil bath is used as a heating source. All solvents and reagents were obtained from commercial sources and were purified according to standard procedures before use. Column chromatography was performed on silica gel (Qingdao, 300 - 400 mesh) using the indicated eluents. NMR spectra were recorded on an Agilent Mercury 600 MHz spectrometer ( $^1\text{H}$ : 600 MHz and  $^{13}\text{C}$ : 150 MHz) in chloroform-*d*.  $^1\text{H}$  and  $^{13}\text{C}$  NMR spectra were internally referenced to the proton ( $^1\text{H}$ ) of the internal TMS signal at 0.00 ppm or the solvent residue of DMSO at 2.54 ppm and the residual carbon nuclei ( $^{13}\text{C}$ ) of the solvent at 77.0 or 39.5 ppm, respectively. Data for  $^1\text{H}$  NMR were recorded as follows: chemical shift ( $\delta$ , ppm), multiplicity (s = singlet, d = doublet, t = triplet, m = multiplet or unresolved, coupling constant(s) in Hz, integration). High resolution mass spectra were obtained using Bruker ESI-QTOF mass spectrometry.

## 2. Preparations of tryptamine substrates

Substrates **1a**, **1e** are known compounds, the general procedure for synthesis of these substrates according to the reported method of the literatures <sup>[1,2]</sup>.

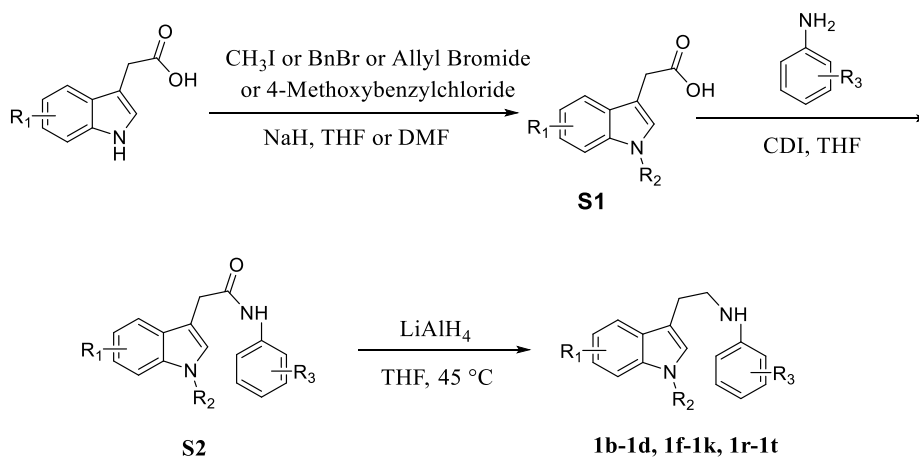

### General Procedures for **1b-1d**, **1f-1k**, **1r-1t**:

To a solution of indole-3-acetic acid (15.0 mmol, 1.0 equiv.) in THF (90 mL), NaH (3.0 g, 75.0 mmol, 5.0 equiv.) was added portionwise at 0 °C under argon atmosphere. The mixture was stirred for 30 minutes and then iodomethane (2.8 mL, 45.0 mmol, 3.0 equiv.) was added dropwise. The reaction was moved to room temperature and after completion as detected by TLC. The reaction mixture was then cooled to 0 °C and the excess hydride was destroyed by the dropwise addition of ice-cold water. Then the mixture was acidified with 6 N HCl and extracted with EtOAc. The combined organic phase was dried and concentrated. The crude solid was recrystallised from EtOAc/ Petroleum ether to give the desired compounds **S1**.

Compounds **S1** (1.0 equiv.) and carbonyl dimidazole (CDI) (1.0 equiv.) were dissolved in THF (3 mL/mmol of **S1**) and stirred at room temperature. After 0.5 h, amine (1.2 equiv.) was added and the reaction mixture stirred overnight (monitored by TLC). Then the mixture was poured into water, extracted by ethyl acetate and the combined organic solvent was dried over Na<sub>2</sub>SO<sub>4</sub>, filtered and concentrated in vacuum. The crude solid was recrystallised from EtOAc/ Petroleum ether to give the desired compounds **S2**.

Under argon atmosphere, the THF solution (10 mL/mmol of **S2**) of **S2** (1.0

equiv.) was added to a stirred slurry of  $\text{LiAlH}_4$  (3.0 equiv.) in THF at 0 °C. The solution was stirred at 45 °C and after completion as detected by TLC. The solution was quenched carefully by  $\text{H}_2\text{O}$  (1.5 mL), 10% aqueous NaOH (3.0 mL),  $\text{H}_2\text{O}$  (4.5 mL) at 0 °C. After being stirred at room temperature for 12 hours. The solution was then filtered and washed with EtOAc. The combined organic layers were dried over  $\text{Na}_2\text{SO}_4$  and the solvent was removed under reduced pressure to give the crude product. The residue was purified by flash column chromatography (Petroleum ether/Ethyl acetate = 20/1) to give the tryptophan derivative **1b-1d**, **1f-1k**, **1r-1t**.

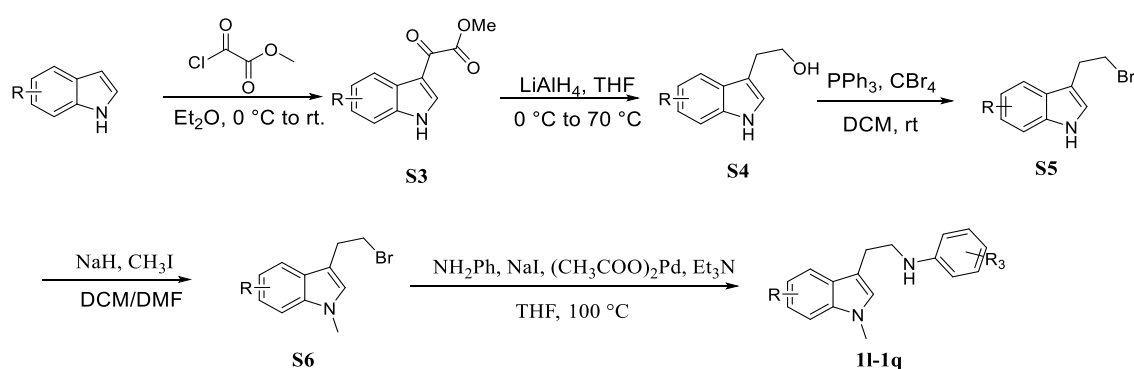

#### General Procedures for **11-1q**:

To a solution of indole (10.0 mmol) in dry  $\text{Et}_2\text{O}$  (50 mL) at 0 °C was added dropwise methyl oxalyl chloride (2.7 mL, 30.0 mmol) under argon atmosphere. The ice bath was removed and the resultant slurry was stirred at room temperature for 48 h. The crude reaction mixture was filtered and washed with cold  $\text{Et}_2\text{O}$ . The solid **S3** was used directly for the next step without further purification. A solution of **S3** in THF (20 mL) was added dropwise to a suspension of  $\text{LiAlH}_4$  (1.52 g, 40.0 mmol) in THF (40 mL) at 0 °C. The solution was stirred at 70 °C for 3 h and quenched carefully by  $\text{H}_2\text{O}$  (1.5 mL), 10% aqueous NaOH (3.0 mL),  $\text{H}_2\text{O}$  (4.5 mL) at 0 °C. After being stirred at room temperature for 12 hours. The solution was then filtered and washed with EtOAc. The combined organic layers were dried over  $\text{Na}_2\text{SO}_4$  and the solvent was removed under reduced pressure to give the crude product. The crude product was purified by flash column chromatography (Petroleum ether/Ethyl acetate = 3/1) to give the compounds **S4**.

Compounds **S4** (1.0 equiv.) and triphenyl phosphine (1.3 equiv.) was dissolved in dry  $\text{CH}_2\text{Cl}_2$  (2 mL/mmol of **S4**). In an addition funnel, carbon tetrabromide (1.3 equiv.)



dissolved in dry  $\text{CH}_2\text{Cl}_2$  was added dropwise under argon atmosphere at  $0\text{ }^\circ\text{C}$ , until the addition was complete. The reaction was allowed to stir at room temperature and when the reaction was completed as monitored by TLC. Solvent was removed under reduced pressure and the residue was purified by flash column chromatography (Petroleum ether/ Ethyl acetate = 10/1) to give the compounds **S5**.

Compounds **S5** (1.0 equiv.) were dissolved in a mixture of anhydrous DCM/DMF (2/1 v/v, 1.5 mL/mmol of **S5**) under magnetic stirring and the temperature was set to  $0\text{ }^\circ\text{C}$ . To this solution, 1.5 equivalents of NaH were added portion wise and the mixture was allowed to react for 30 min. Then, 1.5 equivalents of methyl iodide in DCM were added dropwise and the reaction was warmed to room temperature and when the reaction was completed as monitored by TLC. The reaction was then quenched by a 10% aqueous solution of citric acid and washed with brine. The organic layer was separated, dried over anhydrous  $\text{Na}_2\text{SO}_4$ , filtered and evaporated in vacuo. Crude products were purified by flash column chromatography (Petroleum ether/Ethyl acetate = 30/1) to give the compounds **S6**.

Compounds **S6** (1.0 equiv.) was dissolved in THF (3 mL/mmol of **S6**) and 1.5 equivalents of the proper amine, 1.5 equivalents of TEA, 1.5 equivalents of NaI and 0.3 equivalents of  $\text{Pd}(\text{OAc})_2$  were added to this solution under argon atmosphere. Then, the mixture was stirred at  $100\text{ }^\circ\text{C}$  and when the reaction was completed as monitored by TLC. The reaction was cooled to room temperature. The resulting solid was filtered off and adsorbed onto the minimal amount of silica gel using  $\text{CH}_2\text{Cl}_2$ . The solvent was concentrated under reduced pressure, purified by flash column chromatography (Petroleum ether/Ethyl acetate = 60/1-40/1) to give the tryptophan derivative **1l-1q**.

The physical data for new compounds were provided below:

#### 4-Methyl-N-(2-(1-methyl-1*H*-indol-3-yl)ethyl)aniline (**1b**)

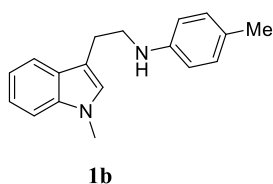

Following the general procedure for preparations of tryptophan derivative **1b-1d**, **1f-1k**, **1r-1t**. The procedure was performed on indole-3-acetic acid (0.70 g, 4.0 mmol) to afford **1b**. Brown solid, 0.47 g, 44% yield;  $^1\text{H NMR}$  (600

MHz, CDCl<sub>3</sub>)  $\delta$  7.73 – 7.65 (m, 1 H), 7.37 (d,  $J$  = 7.0 Hz, 1 H), 7.34 – 7.29 (m, 1 H), 7.22 – 7.16 (m, 1 H), 7.10 – 7.04 (m, 2 H), 6.95 (s, 1 H), 6.66 – 6.59 (m, 2 H), 3.80 (s, 3 H), 3.53 – 3.48 (m, 2 H), 3.17 – 3.10 (m, 2 H), 2.32 (d,  $J$  = 3.0 Hz, 3 H). <sup>13</sup>C NMR (150 MHz, CDCl<sub>3</sub>)  $\delta$  145.9, 137.1, 129.7, 127.8, 126.8, 126.4, 121.6, 118.9, 118.8, 113.2, 111.8, 109.2, 44.5, 32.5, 25.0, 20.4 ppm. HRMS (ESI)  $m/z$ : [M + H]<sup>+</sup> Calcd for C<sub>18</sub>H<sub>21</sub>N<sub>2</sub> 265.1699; Found 265.1697.

#### 4-Ethyl-N-(2-(1-methyl-1H-indol-3-yl)ethyl)aniline (1c)

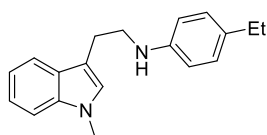

1c

Following the general procedure for preparations of tryptophan derivative **1b-1d**, **1f-1k**, **1r-1t**. The procedure was performed on indole-3-acetic acid (0.70 g, 4.0 mmol) to afford **1c**. Brown oil, 0.57 g, 51% yield; <sup>1</sup>H NMR (600 MHz, CDCl<sub>3</sub>)  $\delta$  7.58 (d,  $J$  = 7.8 Hz, 1 H), 7.25 (d,  $J$  = 8.2 Hz, 1 H), 7.23 – 7.19 (m, 1 H), 7.12 – 7.06 (m, 1 H), 6.99 (d,  $J$  = 8.4 Hz, 2 H), 6.82 (s, 1 H), 6.53 (d,  $J$  = 8.4 Hz, 2 H), 3.66 (s, 3 H), 3.39 (t,  $J$  = 6.8 Hz, 2 H), 3.02 (t,  $J$  = 6.8 Hz, 2 H), 2.52 (q,  $J$  = 7.6 Hz, 2 H), 1.17 (t,  $J$  = 7.6 Hz, 3 H) ppm. <sup>13</sup>C NMR (150 MHz, CDCl<sub>3</sub>)  $\delta$  146.2, 137.0, 133.0, 128.5, 127.8, 126.7, 121.6, 118.8, 118.8, 113.1, 111.8, 109.2, 44.4, 32.4, 27.9, 25.0, 15.9 ppm. HRMS (ESI)  $m/z$ : [M + H]<sup>+</sup> Calcd for C<sub>19</sub>H<sub>23</sub>N<sub>2</sub> 279.1856; Found 279.1853.

#### N-(2-(1-methyl-1H-indol-3-yl)ethyl)-4-propylaniline (1d)

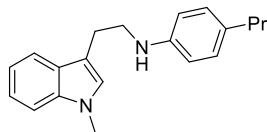

1d

Following the general procedure for preparations of tryptophan derivative **1b-1d**, **1f-1k**, **1r-1t**. The procedure was performed on indole-3-acetic acid (0.70 g, 4.0 mmol) to afford **1d**. Brown oil, 0.57 g, 49% yield; <sup>1</sup>H NMR (600 MHz, CDCl<sub>3</sub>)  $\delta$  7.58 (d,  $J$  = 7.8 Hz, 1 H), 7.26 (d,  $J$  = 8.2 Hz, 1 H), 7.21 (t,  $J$  = 7.4 Hz, 1 H), 7.09 (t,  $J$  = 7.4 Hz, 1 H), 6.97 (d,  $J$  = 8.4 Hz, 2 H), 6.84 (s, 1 H), 6.53 (d,  $J$  = 8.4 Hz, 2 H), 3.68 (s, 3 H), 3.40 (t,  $J$  = 6.8 Hz, 2 H), 3.03 (t,  $J$  = 6.8 Hz, 2 H), 2.46 (t,  $J$  = 7.6 Hz, 2 H), 1.61 – 1.54 (m, 2 H), 0.91 (t,  $J$  = 7.3 Hz, 3 H) ppm. <sup>13</sup>C NMR (150 MHz, CDCl<sub>3</sub>)  $\delta$  146.4, 137.2, 131.7, 129.29, 128.0, 126.9, 121.8, 119.1, 119.0, 113.2, 112.1, 109.4, 44.6, 37.3, 32.7, 25.2, 25.0, 14.0 ppm. HRMS (ESI)  $m/z$ : [M + H]<sup>+</sup> Calcd for C<sub>20</sub>H<sub>25</sub>N<sub>2</sub>

293.2012; Found 293.2011.

### N-(2-(1-methyl-1H-indol-3-yl)ethyl)-4-(trifluoromethoxy)aniline (**1f**)

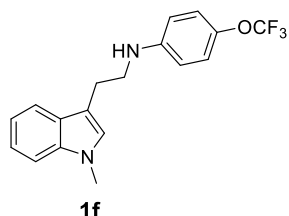

Following the general procedure for preparations of tryptophan derivative **1b-1d**, **1f-1k**, **1r-1t**. The procedure was performed on indole-3-acetic acid (0.70 g, 4.0 mmol) to afford **1f**. Brown oil, 0.79 g, 59% yield;  $^1\text{H NMR}$  (600 MHz,  $\text{CDCl}_3$ )  $\delta$  7.58 (d,  $J = 7.8$  Hz, 1 H), 7.30 (d,  $J = 8.2$  Hz, 1 H), 7.24 (t,  $J = 8.4$  Hz, 1 H), 7.11 (t,  $J = 7.6$  Hz, 1 H), 7.01 (d,  $J = 8.4$  Hz, 2 H), 6.88 (s, 1 H), 6.53 (d,  $J = 7.2$  Hz, 2 H), 3.74 (s, 3 H), 3.42 (t,  $J = 6.8$  Hz, 2 H), 3.06 (t,  $J = 6.6$  Hz, 2 H) ppm.  $^{13}\text{C NMR}$  (150 MHz,  $\text{CDCl}_3$ )  $\delta$  147.0, 140.3, 137.1, 127.8, 126.8, 122.4, 121.8, 120.7(q,  $^1J_{\text{C-F}} = 253.5$  Hz), 118.9, 118.8, 113.1, 111.5, 109.3, 44.3, 32.6, 24.9 ppm.  $^{19}\text{F NMR}$  (565 MHz,  $\text{CDCl}_3$ )  $\delta$  -58.43 ppm. **HRMS (ESI)  $m/z$ : [M + H] $^+$**  Calcd for  $\text{C}_{18}\text{H}_{18}\text{ON}_2\text{F}_3$  335.1366; Found 335.1356.

### N-(2-(1-methyl-1H-indol-3-yl)ethyl)-4-(trifluoromethyl)aniline (**1g**)

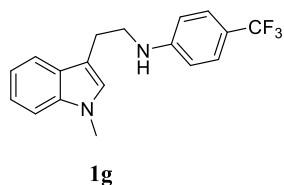

Following the general procedure for preparations of tryptophan derivative **1b-1d**, **1f-1k**, **1r-1t**. The procedure was performed on indole-3-acetic acid (0.52 g, 3.0 mmol) to afford **1g**. Light yellow solid, 0.32 g, 34% yield;  $^1\text{H NMR}$  (600 MHz,  $\text{CDCl}_3$ )  $\delta$  7.59 (d,  $J = 7.8$  Hz, 1 H), 7.38 (d,  $J = 8.4$  Hz, 2 H), 7.32 (d,  $J = 8.2$  Hz, 1 H), 7.27 – 7.22 (m, 1 H), 7.15 – 7.10 (m, 1 H), 6.89 (s, 1H), 6.58 (d,  $J = 8.6$  Hz, 2 H), 4.08 (s, 1 H), 3.76 (s, 3 H), 3.49 – 3.46 (m, 2 H), 3.07 (t,  $J = 6.7$  Hz, 2 H) ppm.  $^{13}\text{C NMR}$  (150 MHz,  $\text{CDCl}_3$ )  $\delta$  150.6, 137.1, 127.7, 126.9, 126.5 (q,  $^3J_{\text{C-F}} = 3.0$  Hz), 125.0 (q,  $^1J_{\text{C-F}} = 268.6$  Hz), 121.8, 119.0, 118.8, 118.6 (q,  $^2J_{\text{C-F}} = 31.6$  Hz), 111.9, 111.3, 109.4, 43.6, 32.6, 24.8 ppm.  $^{19}\text{F NMR}$  (565 MHz,  $\text{CDCl}_3$ )  $\delta$  -60.90 ppm. **HRMS (ESI)  $m/z$ : [M + H] $^+$**  Calcd for  $\text{C}_{18}\text{H}_{18}\text{N}_2\text{F}_3$  319.1417; Found 319.1416.

#### 4-Fluoro-N-(2-(1-methyl-1*H*-indol-3-yl)ethyl)aniline (**1h**)

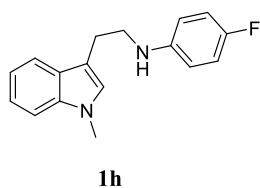

Following the general procedure for preparations of tryptophan derivative **1b-1d**, **1f-1k**, **1r-1t**. The procedure was performed on indole-3-acetic acid (0.70 g, 4.0 mmol) to afford **1h**. Brown oil, 0.54 g, 50 % yield;  $^1\text{H NMR}$  (600 MHz,  $\text{CDCl}_3$ )  $\delta$  7.56 (d,  $J = 7.8$  Hz, 1 H), 7.25 (d,  $J = 8.2$  Hz, 1 H), 7.21 (t,  $J = 7.4$  Hz, 1 H), 7.09 (t,  $J = 7.4$  Hz, 1 H), 6.85 – 6.80 (m, 3 H), 6.49 – 6.46 (m, 2 H), 3.65 (s, 3 H), 3.48 (br, 1 H), 3.34 (t,  $J = 6.8$  Hz, 2 H), 3.00 (t,  $J = 6.8$  Hz, 2 H) ppm.  $^{13}\text{C NMR}$  (150 MHz,  $\text{CDCl}_3$ )  $\delta$  155.7 (d,  $^1J_{\text{C-F}} = 232.6$  Hz), 144.4, 137.0, 127.7, 126.8, 121.6, 118.8, 118.7, 115.6 (d,  $^2J_{\text{C-F}} = 22.6$  Hz), 113.8 (d,  $^3J_{\text{C-F}} = 7.6$  Hz), 111.5, 109.2, 44.8, 32.4, 24.8 ppm.  $^{19}\text{F NMR}$  (565 MHz,  $\text{CDCl}_3$ )  $\delta$  -127.81 ppm. **HRMS (ESI)  $m/z$** :  $[\text{M} + \text{H}]^+$  Calcd for  $\text{C}_{17}\text{H}_{18}\text{N}_2\text{F}$  269.1448; Found 269.1447.

#### 3-methyl-N-(2-(1-methyl-1*H*-indol-3-yl)ethyl)aniline (**1i**)

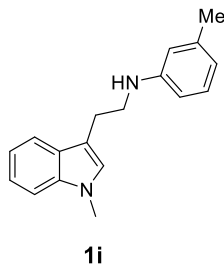

Following the general procedure for preparations of tryptophan derivative **1b-1d**, **1f-1k**, **1r-1t**. The procedure was performed on indole-3-acetic acid (0.35 g, 2.0 mmol) to afford **1i**. Brown oil, 0.28 g, 53 % yield;  $^1\text{H NMR}$  (600 MHz,  $\text{CDCl}_3$ )  $\delta$  7.60 (d,  $J = 8.0$  Hz, 1 H), 7.30 (d,  $J = 8.2$  Hz, 1 H), 7.25 – 7.21 (m, 1 H), 7.13 – 7.09 (m, 1 H), 7.08 – 7.03 (m, 1 H), 6.89 (s, 1 H), 6.52 (d,  $J = 7.6$  Hz, 1 H), 6.45 – 6.41 (m, 2 H), 3.74 (s, 3 H), 3.44 (t,  $J = 6.8$  Hz, 2 H), 3.06 (t,  $J = 6.8$  Hz, 2 H), 2.26 (s, 3 H) ppm.  $^{13}\text{C NMR}$  (150 MHz,  $\text{CDCl}_3$ )  $\delta$  148.3, 138.9, 137.1, 129.1, 127.8, 126.8, 121.7, 118.9, 118.8, 118.2, 113.8, 111.8, 110.2, 109.2, 44.2, 32.6, 25.0, 21.6 ppm. **HRMS (ESI)  $m/z$** :  $[\text{M} + \text{H}]^+$  Calcd for  $\text{C}_{18}\text{H}_{21}\text{N}_2$  265.1699; Found 265.1692.

#### 3-Bromo-N-(2-(1-methyl-1*H*-indol-3-yl)ethyl)aniline (**1j**)

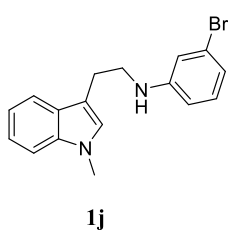

Following the general procedure for preparations of tryptophan derivative **1b-1d**, **1f-1k**, **1r-1t**. The procedure was performed on indole-3-acetic acid (1.05 g, 6.0 mmol) to afford **1j**. Brown oil,

1.17 g, 59 % yield;  $^1\text{H NMR}$  (600 MHz,  $\text{CDCl}_3$ )  $\delta$  7.64 (d,  $J = 7.9$  Hz, 1 H), 7.36 (d,  $J = 8.2$  Hz, 1 H), 7.30 (t,  $J = 7.6$  Hz, 1 H), 7.19 – 7.15 (m, 1 H), 7.03 (t,  $J = 8.0$  Hz, 1 H), 6.92 (s, 1 H), 6.85 – 6.82 (m, 1 H), 6.78 – 6.76 (m, 1 H), 6.53 (dd,  $J = 8.4, 2.2$  Hz, 1 H), 3.85 (s, 1 H), 3.79 (s, 3 H), 3.45 (t,  $J = 6.8$  Hz, 2 H), 3.09 (t,  $J = 6.8$  Hz, 2 H) ppm.  $^{13}\text{C NMR}$  (150 MHz,  $\text{CDCl}_3$ )  $\delta$  149.5, 137.1, 130.4, 127.7, 126.8, 123.2, 121.7, 119.8, 118.9, 118.8, 115.3, 111.6, 111.4, 109.3, 43.8, 32.6, 24.8 ppm. **HRMS (ESI)**  $m/z$ :  $[\text{M} + \text{H}]^+$  Calcd for  $\text{C}_{17}\text{H}_{18}\text{N}_2\text{Br}$  329.0648; Found 329.0646.

### N-(2-(5-bromo-1-methyl-1*H*-indol-3-yl)ethyl)aniline (**1k**)

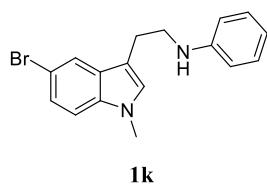

Following the general procedure for preparations of tryptophan derivative **1b-1d**, **1f-1k**, **1r-1t**. The procedure was performed on 5-bromo-3-indoleacetic acid (0.76 g, 3.0 mmol) to afford **1k**.

Brown oil, 0.30 g, 29 % yield;  $^1\text{H NMR}$  (600 MHz,  $\text{CDCl}_3$ )  $\delta$  7.68 (s, 1 H), 7.28 (d,  $J = 8.8$  Hz, 1 H), 7.16 (t,  $J = 7.8$  Hz, 2 H), 7.12 (d,  $J = 8.8$  Hz, 1 H), 6.86 (s, 1 H), 6.69 (t,  $J = 7.2$  Hz, 1 H), 6.59 (d,  $J = 8.0$  Hz, 2 H), 3.68 (s, 3 H), 3.39 (t,  $J = 6.8$  Hz, 2 H), 2.97 (t,  $J = 6.8$  Hz, 2 H) ppm.  $^{13}\text{C NMR}$  (150 MHz,  $\text{CDCl}_3$ )  $\delta$  148.0, 135.7, 129.5, 129.2, 127.9, 124.4, 121.4, 117.3, 112.9, 112.2, 111.5, 110.8, 44.0, 32.7, 24.8 ppm. **HRMS (ESI)**  $m/z$ :  $[\text{M} + \text{H}]^+$  Calcd for  $\text{C}_{17}\text{H}_{18}\text{N}_2\text{Br}$  329.0648; Found 329.0647.

### N-(2-(7-ethyl-1-methyl-1*H*-indol-3-yl)ethyl)aniline (**1l**)

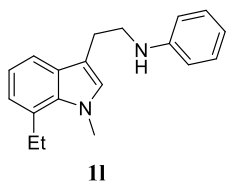

Following the general procedure for preparations of tryptophan derivative **1l-1q**. The procedure was performed on 7-ethyl tryptophol (1.14 g, 6.0 mmol) to afford **1l**. Brown oil, 0.34 g, 20 % yield;  $^1\text{H NMR}$  (600 MHz,  $\text{CDCl}_3$ )  $\delta$  7.42 (d,  $J = 7.8$  Hz, 1 H),

7.15 (t,  $J = 7.6$  Hz, 2 H), 7.01 (t,  $J = 7.5$  Hz, 1 H), 6.99 – 6.95 (m, 1 H), 6.73 (s, 1 H), 6.67 (t,  $J = 7.2$  Hz, 1 H), 6.58 (d,  $J = 7.8$  Hz, 2 H), 3.92 (s, 3 H), 3.40 (t,  $J = 6.8$  Hz, 2 H), 3.07 (q,  $J = 7.6$  Hz, 2 H), 3.00 (t,  $J = 6.8$  Hz, 2 H), 1.33 (t,  $J = 7.4$  Hz, 3 H) ppm.  $^{13}\text{C NMR}$  (150 MHz,  $\text{CDCl}_3$ )  $\delta$  148.2, 134.9, 129.3, 129.1, 128.6, 127.9, 122.6, 119.2,

117.1, 116.8, 112.9, 111.5, 43.9, 36.4, 25.4, 24.8, 16.6 ppm. **HRMS (ESI)  $m/z$ :**  $[M + H]^+$  Calcd for  $C_{19}H_{23}N_2$  279.1856; Found 279.1855.

**N-(2-(5-fluoro-1-methyl-1H-indol-3-yl)ethyl)-4-methylaniline (1m)**

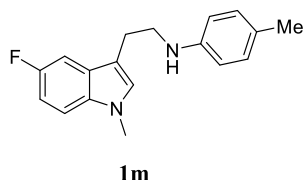

Following the general procedure for preparations of tryptophan derivative **11-1q**. The procedure was performed on 5-fluoroindole (1.35 g, 10.0 mmol) to afford **1m**.

Brown oil, 0.36 g, 13 % yield;  **$^1H$  NMR** (600 MHz,  $CDCl_3$ )

$\delta$  7.21 (dd,  $J = 9.8, 2.4$  Hz, 1 H), 7.16 (dd,  $J = 8.8, 4.2$  Hz, 1 H), 6.98 (d,  $J = 8.2$  Hz, 2 H), 6.94 (dd,  $J = 9.0, 2.4$  Hz, 1 H), 6.90 (s, 1 H), 6.53 (d,  $J = 8.4$  Hz, 2 H), 3.69 (s, 3 H), 3.38 (t,  $J = 6.8$  Hz, 2 H), 2.97 (t,  $J = 6.8$  Hz, 2 H), 2.23 (s, 3 H) ppm.  **$^{13}C$  NMR** (150 MHz,  $CDCl_3$ )  $\delta$  157.5 (d,  $^1J_{C-F} = 232.4$  Hz), 145.8, 133.7, 129.7, 128.4, 128.0 (d,  $^3J_{C-F} = 9.0$  Hz), 126.5, 113.2, 111.8 (d,  $^4J_{C-F} = 4.5$  Hz), 109.9 (d,  $^2J_{C-F} = 27.0$  Hz), 109.8 (d,  $^3J_{C-F} = 10.6$  Hz), 103.8 (d,  $^2J_{C-F} = 24.0$  Hz), 44.4, 32.8, 24.9, 20.3 ppm.  **$^{19}F$  NMR** (565 MHz,  $CDCl_3$ )  $\delta$  -125.36 ppm. **HRMS (ESI)  $m/z$ :**  $[M + H]^+$  Calcd for  $C_{18}H_{20}N_2F$  283.1605; Found 283.1606.

**N-(2-(4-fluoro-1-methyl-1H-indol-3-yl)ethyl)-4-methylaniline (1n)**

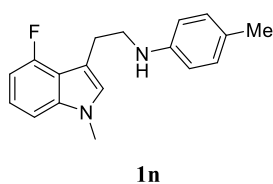

Following the general procedure for preparations of tryptophan derivative **11-1q**. The procedure was performed on 4-fluoroindole (1.35 g, 10.0 mmol) to afford **1n**. Brown oil, 0.33 g, 11 % yield;  **$^1H$  NMR** (600 MHz,  $CDCl_3$ )  $\delta$  7.16 –

7.12 (m, 1 H), 7.08 (d,  $J = 8.2$  Hz, 1 H), 7.02 (d,  $J = 8.0$  Hz, 2 H), 6.85 (s, 1 H), 6.78 (dd,  $J = 11.2, 7.8$  Hz, 1 H), 6.60 (d,  $J = 8.2$  Hz, 2 H), 3.75 (s, 3 H), 3.47 (t,  $J = 6.8$  Hz, 2 H), 3.16 (t,  $J = 6.8$  Hz, 2 H), 2.27 (s, 3 H) ppm.  **$^{13}C$  NMR** (150 MHz,  $CDCl_3$ )  $\delta$  157.2 (d,  $^1J_{C-F} = 244.8$  Hz), 146.0, 140.0 (d,  $^3J_{C-F} = 10.6$  Hz), 129.7, 127.1, 126.4, 122.1 (d,  $^3J_{C-F} = 7.6$  Hz), 116.4 (d,  $^2J_{C-F} = 19.6$  Hz), 113.2, 110.7 (d,  $^4J_{C-F} = 3.0$  Hz), 105.4 (d,  $^3J_{C-F} = 4.6$  Hz), 104.1 (d,  $^2J_{C-F} = 19.6$  Hz), 45.0 (d,  $^4J_{C-F} = 1.6$  Hz), 32.9, 26.2, 20.4 ppm.  **$^{19}F$  NMR** (565 MHz,  $CDCl_3$ )  $\delta$  -123.36 ppm. **HRMS (ESI)  $m/z$ :**  $[M +$

$[H]^+$  Calcd for  $C_{18}H_{20}N_2F$  283.1605; Found 283.1603.

#### 4-Ethyl-N-(2-(4-fluoro-1-methyl-1H-indol-3-yl)ethyl)aniline (**1o**)

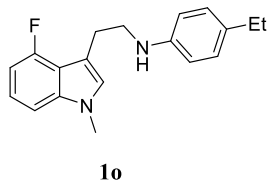

Following the general procedure for preparations of tryptophan derivative **11-1q**. The procedure was performed on 4-fluoroindole (1.35 g, 10.0 mmol) to afford **1o**. yellow oil, 0.17 g, 6 % yield;  $^1H$  NMR (600 MHz,  $CDCl_3$ )  $\delta$  7.14 – 7.09 (m, 1 H), 7.06 (d,  $J = 8.2$  Hz, 1 H), 7.02 (d,  $J = 7.8$  Hz, 2 H), 6.84 (s, 1 H), 6.77 – 6.73 (m, 1 H), 6.59 (d,  $J = 7.4$  Hz, 2 H), 3.74 (s, 3 H), 3.44 (t,  $J = 6.8$  Hz, 2 H), 3.13 (t,  $J = 6.8$  Hz, 2 H), 2.54 (q,  $J = 7.6$  Hz, 2 H), 1.19 (t,  $J = 7.6$  Hz, 3 H) ppm.  $^{13}C$  NMR (150 MHz,  $CDCl_3$ )  $\delta$  157.2(d,  $^1J_{C-F} = 244.6$  Hz), 146.3, 140.0 (d,  $^3J_{C-F} = 10.5$  Hz), 133.1, 128.5, 127.1, 122.1(d,  $^3J_{C-F} = 7.6$  Hz), 116.3(d,  $^2J = 19.5$  Hz), 113.1, 110.8 (d,  $^4J_{C-F} = 3.0$  Hz), 105.4 (d,  $^3J_{C-F} = 3.0$  Hz), 104.1(d,  $^2J = 19.5$  Hz), 45.0 (d,  $^4J_{C-F} = 3.0$  Hz), 32.9, 27.9, 26.3, 16.0 ppm.  $^{19}F$  NMR (565 MHz,  $CDCl_3$ )  $\delta$  -123.39 ppm. HRMS (ESI)  $m/z$ :  $[M + H]^+$  Calcd for  $C_{19}H_{22}N_2F$  297.1762; Found 297.1761.

#### N-(2-(1,5-dimethyl-1H-indol-3-yl)ethyl)-4-ethylaniline (**1p**)

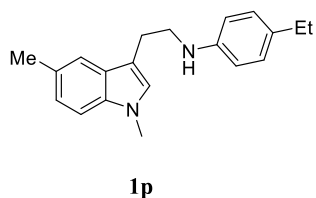

Following the general procedure for preparations of tryptophan derivative **11-1q**. The procedure was performed on 5-methylindole (1.57 g, 12.0 mmol) to afford **1p**. Brown oil, 0.35 g, 10 % yield;  $^1H$  NMR (600 MHz,  $CDCl_3$ )  $\delta$  7.36 (s, 1 H), 7.16 (d,  $J = 8.4$  Hz, 1 H), 7.04 (dd,  $J = 8.4, 1.6$  Hz, 1 H), 7.00 (d,  $J = 8.4$  Hz, 2 H), 6.82 (s, 1 H), 6.55 (d,  $J = 8.4$  Hz, 2 H), 3.67 (s, 3 H), 3.40 (t,  $J = 6.8$  Hz, 2 H), 3.01 (t,  $J = 6.8$  Hz, 2 H), 2.53 (q,  $J = 7.6$  Hz, 2 H), 2.45 (s, 3 H), 1.18 (t,  $J = 7.6$  Hz, 3 H) ppm.  $^{13}C$  NMR (150 MHz,  $CDCl_3$ )  $\delta$  146.2, 135.5, 133.1, 128.5, 128.0, 128.0, 126.8, 123.2, 118.6, 113.1, 111.2, 108.9, 44.5, 32.5, 27.9, 25.0, 21.4, 16.0 ppm. HRMS (ESI)  $m/z$ :  $[M + H]^+$  Calcd for  $C_{20}H_{25}N_2$  293.2012; Found 293.2012.

#### N-(2-(6-chloro-1-methyl-1H-indol-3-yl)ethyl)-4-ethylaniline (**1q**)

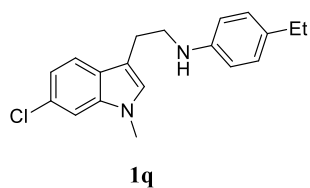

Following the general procedure for preparations of tryptophan derivative **1l-1q**. The procedure was performed on 6-chloroindole (1.82 g, 12.0 mmol) to afford **1q**. Brown oil, 0.34 g, 9 % yield;  $^1\text{H NMR}$  (600 MHz,  $\text{CDCl}_3$ )  $\delta$  7.45 (d,  $J = 8.4$  Hz, 1 H), 7.25 (s, 1 H), 7.05 (d,  $J = 8.4$  Hz, 1 H), 7.00 (d,  $J = 8.4$  Hz, 2 H), 6.84 (s, 1 H), 6.54 (d,  $J = 8.4$  Hz, 2 H), 3.64 (s, 3 H), 3.38 (t,  $J = 6.8$  Hz, 2 H), 2.99 (t,  $J = 6.8$  Hz, 2 H), 2.53 (q,  $J = 7.6$  Hz, 2 H), 1.18 (t,  $J = 7.6$  Hz, 3 H) ppm.  $^{13}\text{C NMR}$  (150 MHz,  $\text{CDCl}_3$ )  $\delta$  146.0, 137.4, 133.2, 128.5, 127.7, 127.4, 126.4, 119.7, 119.4, 113.1, 112.2, 109.2, 44.4, 32.6, 27.9, 24.9, 15.9 ppm. **HRMS (ESI)  $m/z$ :**  $[\text{M} + \text{H}]^+$  Calcd for  $\text{C}_{18}\text{H}_{22}\text{N}_2\text{Cl}$  313.1466; Found 313.1466.

#### N-(2-(1-benzyl-1H-indol-3-yl)ethyl)aniline (**1r**)

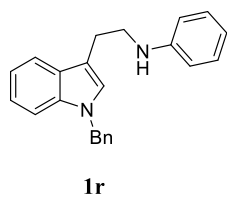

Following the general procedure for preparations of tryptophan derivative **1b-1d**, **1f-1k**, **1r-1t**. The procedure was performed on indole-3-acetic acid (1.05 g, 6.0 mmol) and benzyl bromide (3.08 g, 18.0 mmol) to afford **1r**. Brown oil, 0.58 g, 29 % yield;  $^1\text{H NMR}$  (600 MHz,  $\text{CDCl}_3$ )  $\delta$  7.60 (d,  $J = 7.8$  Hz, 1 H), 7.27 – 7.19 (m, 4 H), 7.18 – 7.12 (m, 3 H), 7.10 (t,  $J = 7.6$  Hz, 1 H), 7.06 (d,  $J = 7.2$  Hz, 2 H), 6.90 (s, 1 H), 6.67 (t,  $J = 7.3$  Hz, 1 H), 6.56 (d,  $J = 7.4$  Hz, 2 H), 5.20 (s, 2 H), 3.42 (t,  $J = 6.8$  Hz, 2 H), 3.04 (t,  $J = 6.8$  Hz, 2 H) ppm.  $^{13}\text{C NMR}$  (150 MHz,  $\text{CDCl}_3$ )  $\delta$  148.1, 137.6, 136.8, 129.2, 128.7, 128.0, 127.5, 126.7, 126.1, 121.9, 119.1, 119.0, 117.2, 113.0, 112.5, 109.7, 49.8, 44.0, 25.0 ppm. **HRMS (ESI)  $m/z$ :**  $[\text{M} + \text{H}]^+$  Calcd for  $\text{C}_{23}\text{H}_{23}\text{N}_2$  327.1856; Found 327.1857.

#### N-(2-(1-(4-methoxybenzyl)-1H-indol-3-yl)ethyl)aniline (**1s**)

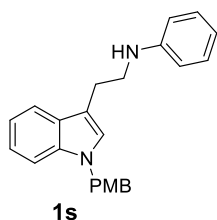

Following the general procedure for preparations of tryptophan derivative **1b-1d**, **1f-1k**, **1r-1t**. The procedure was performed on indole-3-acetic acid (1.0 g, 5.71 mmol) to afford **1s**. Brown oil, 0.83 g, 41% yield;  $^1\text{H NMR}$  (600 MHz,  $\text{CDCl}_3$ )  $\delta$  7.64 (d,  $J = 7.8$



Hz, 1 H), 7.32 (d,  $J = 8.4$  Hz, 1 H), 7.23 – 7.15 (m, 3 H), 7.13 (t,  $J = 7.5$  Hz, 1 H), 7.08 (d,  $J = 8.5$  Hz, 2 H), 6.95 (s, 1 H), 6.87 – 6.81 (m, 2 H), 6.71 (t,  $J = 7.3$  Hz, 1 H), 6.61 (d,  $J = 7.7$  Hz, 2 H), 5.21 (s, 2 H), 3.78 (s, 3 H), 3.47 (t,  $J = 6.8$  Hz, 2 H), 3.11 – 3.05 (m, 2 H) ppm.  $^{13}\text{C}$  NMR (150 MHz,  $\text{CDCl}_3$ )  $\delta$  159.1, 148.2, 136.7, 129.6, 129.2, 128.2, 128.1, 126.0, 121.8, 119.1, 119.0, 117.3, 114.1, 113.0, 112.4, 109.7, 55.2, 49.4, 44.0, 25.1 ppm. HRMS (ESI)  $m/z$ :  $[\text{M} + \text{H}]^+$  Calcd for  $\text{C}_{24}\text{H}_{25}\text{ON}_2$  357.1961; Found 357.1952.

#### N-(2-(1-allyl-1H-indol-3-yl)ethyl)aniline (**1t**)

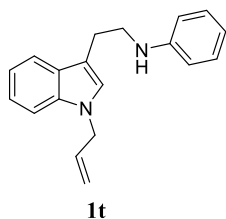

Following the general procedure for preparations of tryptophan derivative **1b-1d**, **1f-1k**, **1r-1t**. The procedure was performed on indole-3-acetic acid (1.05 g, 6.0 mmol) and allyl bromide (2.1776 g, 18.0 mmol) to afford **1t**. Brown oil, 0.26 g, 16% yield;  $^1\text{H}$  NMR (600 MHz,  $\text{CDCl}_3$ )  $\delta$  7.59 (d,  $J = 7.8$  Hz, 1 H), 7.27 (d,  $J = 8.2$  Hz, 1 H), 7.22 – 7.18 (m, 1 H), 7.15 (t,  $J = 7.9$  Hz, 2 H), 7.13 – 7.08 (m, 1 H), 6.89 (s, 1 H), 6.68 (t,  $J = 7.4$  Hz, 1 H), 6.58 (d,  $J = 8.6$  Hz, 2 H), 5.98 – 5.90 (m, 1 H), 5.16 (d,  $J = 10.2$  Hz, 1 H), 5.05 (d,  $J = 17.0$  Hz, 1 H), 4.62 (d,  $J = 5.4$  Hz, 2 H), 3.42 (t,  $J = 6.8$  Hz, 2 H), 3.04 (t,  $J = 6.8$  Hz, 2 H) ppm.  $^{13}\text{C}$  NMR (150 MHz,  $\text{CDCl}_3$ )  $\delta$  148.2, 136.5, 133.5, 129.3, 128.0, 125.7, 121.7, 119.0, 118.9, 117.2, 117.1, 112.9, 112.2, 109.6, 48.6, 44.0, 25.0 ppm. HRMS (ESI)  $m/z$ :  $[\text{M} + \text{H}]^+$  Calcd for  $\text{C}_{19}\text{H}_{21}\text{N}_2$  277.1699; Found 277.1700.

### 3. Optimization of the reaction conditions

#### 3.1 Ligands screening <sup>a</sup>

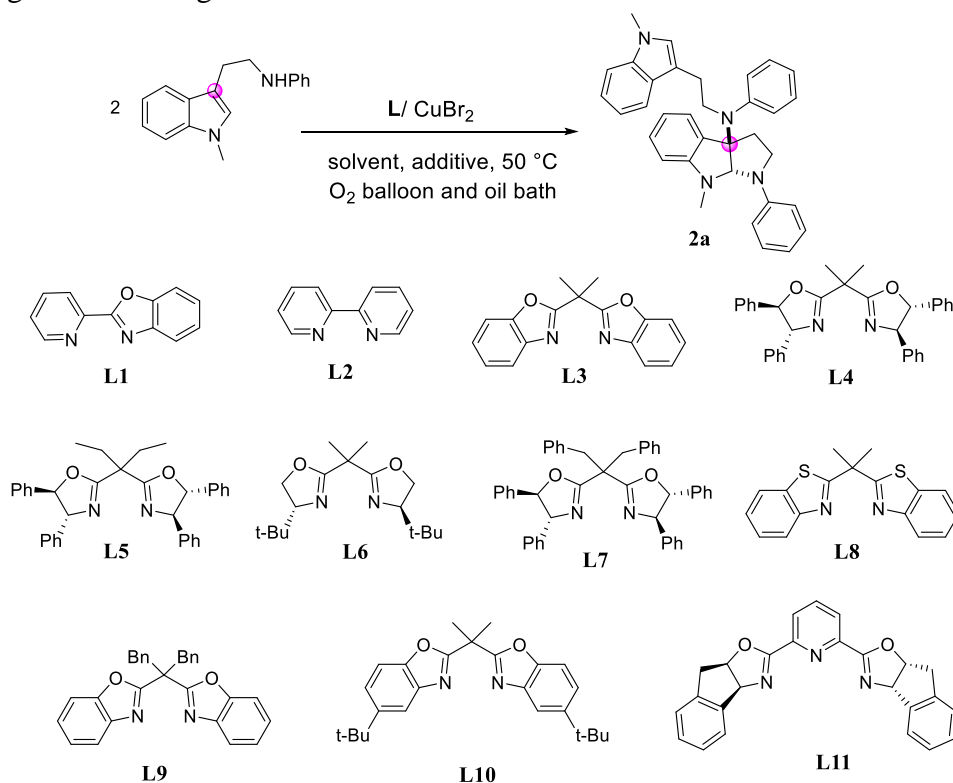

| Entry | L          | Solvent | Additives | T (h) | Yields (%) <sup>a</sup> |
|-------|------------|---------|-----------|-------|-------------------------|
| 1     | -          | PhCl    | -         | 48    | trace                   |
| 2     | <b>L1</b>  | PhCl    | -         | 48    | 13                      |
| 3     | <b>L2</b>  | PhCl    | -         | 48    | NR                      |
| 4     | <b>L3</b>  | PhCl    | -         | 48    | NR                      |
| 5     | <b>L4</b>  | PhCl    | -         | 22    | 16                      |
| 6     | <b>L5</b>  | PhCl    | -         | 48    | Trace                   |
| 7     | <b>L6</b>  | PhCl    | -         | 48    | Trace                   |
| 8     | <b>L7</b>  | PhCl    | -         | 48    | 8                       |
| 9     | <b>L8</b>  | PhCl    | -         | 48    | NR                      |
| 10    | <b>L9</b>  | PhCl    | -         | 48    | NR                      |
| 11    | <b>L10</b> | PhCl    | -         | 48    | NR                      |
| 12    | <b>L11</b> | PhCl    | -         | 48    | NR                      |

<sup>a</sup> The reactions were carried out under  $\text{O}_2$  balloon: Metal salts (0.02 mmol), **L** (0.024 mmol), Solvent (2.0 mL), **1a** (0.20 mmol). Yields were determined by  $^1\text{H}$  NMR with TTCE as the internal standard.

### 3.2 Metal salts screening<sup>a</sup>

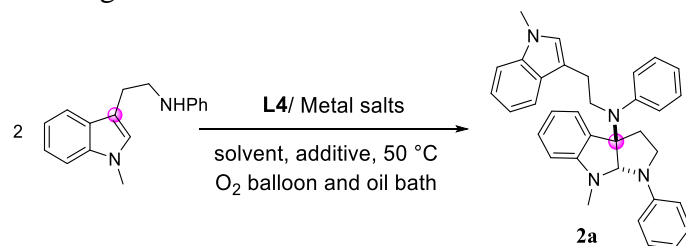

| Entry | L         | Solvent | Metal salts                                           | Additives | T (h) | Yields (%) <sup>a</sup> |
|-------|-----------|---------|-------------------------------------------------------|-----------|-------|-------------------------|
| 1     | <b>L4</b> | PhCl    | CuBr <sub>2</sub>                                     | -         | 22    | 16                      |
| 2     | <b>L4</b> | PhCl    | CuBr                                                  | -         | 48    | 7                       |
| 3     | <b>L4</b> | PhCl    | CuCl                                                  | -         | 47    | 9                       |
| 4     | <b>L4</b> | PhCl    | Cu <sub>2</sub> O                                     | -         | 48    | Nr                      |
| 5     | <b>L4</b> | PhCl    | CuI                                                   | -         | 48    | Nr                      |
| 6     | <b>L4</b> | PhCl    | Cu(OTf) <sub>2</sub>                                  | -         | 48    | 6                       |
| 7     | <b>L4</b> | PhCl    | CuOAc                                                 | -         | 48    | Nr                      |
| 8     | <b>L4</b> | PhCl    | Cu(ClO <sub>4</sub> ) <sub>2</sub> ·6H <sub>2</sub> O | -         | 48    | 11                      |
| 9     | <b>L4</b> | PhCl    | CuBr <sub>2</sub> /Cu(OTf) <sub>2</sub>               | -         | 6     | 13                      |

<sup>a</sup> The reactions were carried out under O<sub>2</sub> balloon: Metal salts (0.02 mmol), **L** (0.024 mmol), Solvent (2.0 mL), **1a** (0.20 mmol). Yields were determined by <sup>1</sup>H NMR with TTCE as the internal standard.

### 3.3 Solvent screening<sup>a</sup>

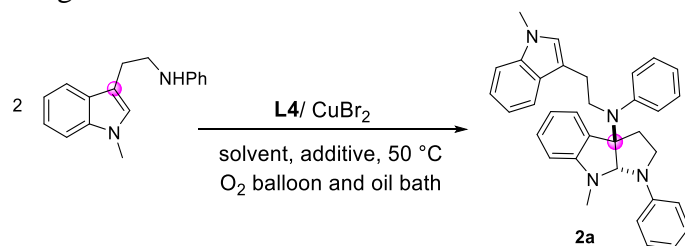

| Entry | L         | Solvent           | Additives | T (h) | Yields (%) <sup>a</sup> |
|-------|-----------|-------------------|-----------|-------|-------------------------|
| 1     | <b>L4</b> | PhCl              | -         | 22    | 16                      |
| 2     | <b>L4</b> | PhCF <sub>3</sub> | -         | 27    | 27                      |
| 3     | <b>L4</b> | PhMe              | -         | 22    | 26                      |
| 4     | <b>L4</b> | Mesitylene        | -         | 48    | 34                      |
| 5     | <b>L4</b> | EA                | -         | 48    | 22                      |
| 6     | <b>L4</b> | MeOH              | -         | 4     | 20                      |
| 7     | <b>L4</b> | 1,4-dioxane       | -         | 22    | 21                      |
| 8     | <b>L4</b> | ACN               | -         | 48    | 15                      |

<sup>a</sup> The reactions were carried out under O<sub>2</sub> balloon: Metal salts (0.02 mmol), **L4** (0.024 mmol), Solvent (2.0 mL), **1a** (0.20 mmol). Yields were determined by <sup>1</sup>H NMR with TTCE as the internal standard.

### 3.4 Additives screening<sup>a</sup>

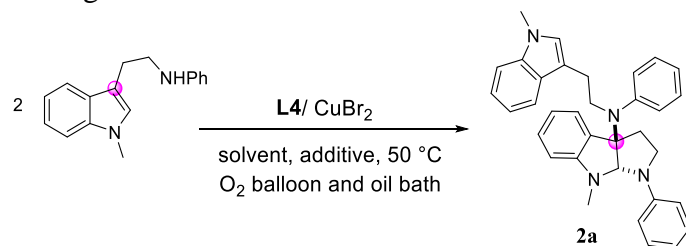

| Entry           | L         | Solvent    | Additives                                                                     | <i>t</i> (h) | Yields (%) <sup>a</sup> |
|-----------------|-----------|------------|-------------------------------------------------------------------------------|--------------|-------------------------|
| 1               | <b>L4</b> | Mesitylene | -                                                                             | 48           | 34                      |
| 2               | <b>L4</b> | Mesitylene | 4 Å MS                                                                        | 48           | 54                      |
| 3 <sup>c</sup>  | <b>L4</b> | Mesitylene | HClO <sub>4</sub>                                                             | 49           | 51                      |
| 4 <sup>c</sup>  | <b>L4</b> | Mesitylene | AcOH                                                                          | 48           | 49                      |
| 5 <sup>c</sup>  | <b>L4</b> | Mesitylene | H <sub>3</sub> BO <sub>3</sub>                                                | 36           | 49                      |
| 6 <sup>c</sup>  | <b>L4</b> | Mesitylene | <i>t</i> -BuOK                                                                | 48           | 46                      |
| 7 <sup>c</sup>  | <b>L4</b> | Mesitylene | Na <sub>2</sub> CO <sub>3</sub>                                               | 48           | 44                      |
| 8 <sup>c</sup>  | <b>L4</b> | Mesitylene | KH <sub>2</sub> PO <sub>4</sub>                                               | 48           | 50                      |
| 9 <sup>c</sup>  | <b>L4</b> | Mesitylene | NH <sub>4</sub> H <sub>2</sub> PO <sub>4</sub>                                | 47           | 62                      |
| 10 <sup>c</sup> | <b>L4</b> | Mesitylene | NaH <sub>2</sub> PO <sub>4</sub>                                              | 47           | 52 <sup>b</sup>         |
| 11 <sup>c</sup> | <b>L4</b> | Mesitylene | ZnI <sub>2</sub> <sup>d</sup>                                                 | 27           | 63 <sup>b</sup>         |
| 12 <sup>c</sup> | <b>L4</b> | Mesitylene | NH <sub>4</sub> H <sub>2</sub> PO <sub>4</sub> /ZnI <sub>2</sub> <sup>d</sup> | 16           | 68 <sup>b</sup>         |
| 13 <sup>c</sup> | <b>L1</b> | PhCl       | NH <sub>4</sub> H <sub>2</sub> PO <sub>4</sub> /ZnI <sub>2</sub> <sup>d</sup> | 22           | 62 <sup>b</sup>         |

<sup>a</sup> The reactions were carried out under O<sub>2</sub> balloon: Metal salts (0.02 mmol), **L4** (0.024 mmol), Solvent (2.0 mL), **1a** (0.20 mmol). Yields were determined by <sup>1</sup>H NMR with TTCE as the internal standard. <sup>b</sup> Isolated yield. <sup>c</sup> 4ÅMSs (200 mg). <sup>d</sup> ZnI<sub>2</sub>(0.03 mmol).

## 4. Mechanistic studies

### 4.1 Radical trapping experiments

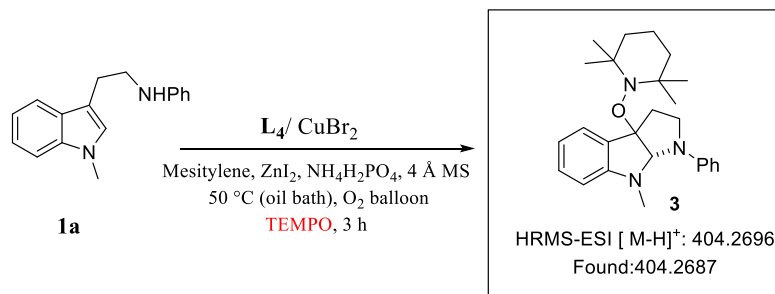

**Procedure:** A mixture of **1a** (50.1 mg, 0.2 mmol), CuBr<sub>2</sub> (4.5 mg, 0.02 mmol), **L4** (11.7 mg, 0.024 mmol), ZnI<sub>2</sub> (9.6 mg, 0.03 mmol), NH<sub>4</sub>H<sub>2</sub>PO<sub>4</sub> (2.3 mg, 0.02 mmol), TEMPO (62.5 mg, 0.4 mmol) and 4 Å MS (200 mg) in Mesitylene (2 mL) was stirred at 50 °C under O<sub>2</sub> balloon. After 3 hours of reaction, send it to HRMS-ESI for monitoring.

ra-781 #27 RT: 0.12 AV: 1 NL: 4.34E+006  
T: FTMS + p ESI Full ms [100.0000-1500.0000]

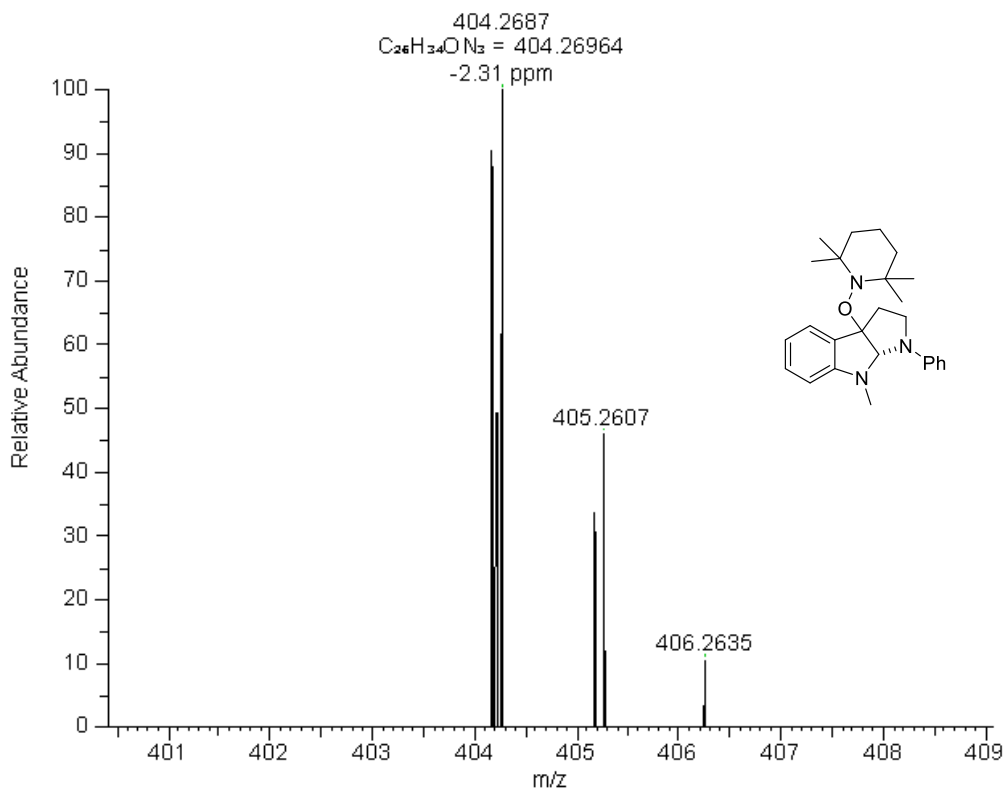

## 4.2 C3a-cation-pyrroloindoline intermediate investigations

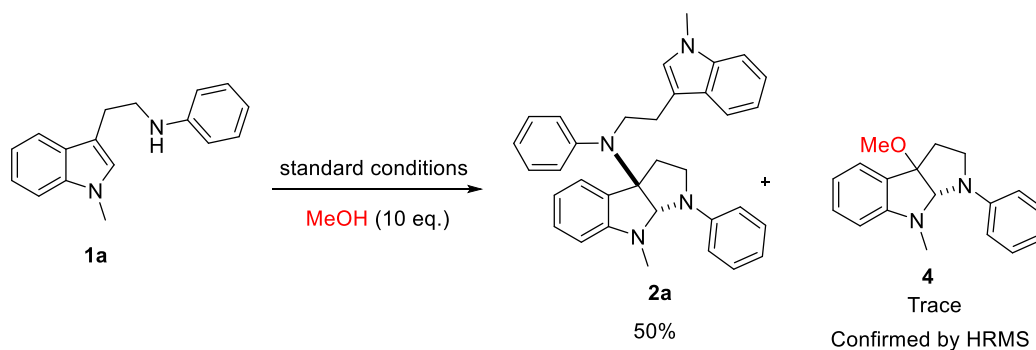

**Procedure:** A mixture of **1a** (50.1 mg, 0.2 mmol), MeOH (64.1mg, 2 mmol), CuBr<sub>2</sub> (4.5 mg, 0.02 mmol), **L4** (11.7 mg, 0.024 mmol), ZnI<sub>2</sub> (9.6mg, 0.03 mmol), NH<sub>4</sub>H<sub>2</sub>PO<sub>4</sub> (2.3mg, 0.02 mmol) and 4 Å MS (200 mg) in Mesitylene (2 mL) was stirred at 50 °C under O<sub>2</sub> balloon. After 17 hours of reaction, we stopped the reaction. The Yield of **2a** was determined by <sup>1</sup>H NMR with TTCE as the internal standard and compound **4** was confirmed by HRMS analysis.

RA-794 #25 RT: 0.11 AV: 1 NL: 1.89E7  
T: FTMS+p ESI Full ms [100.0000-1500.0000]

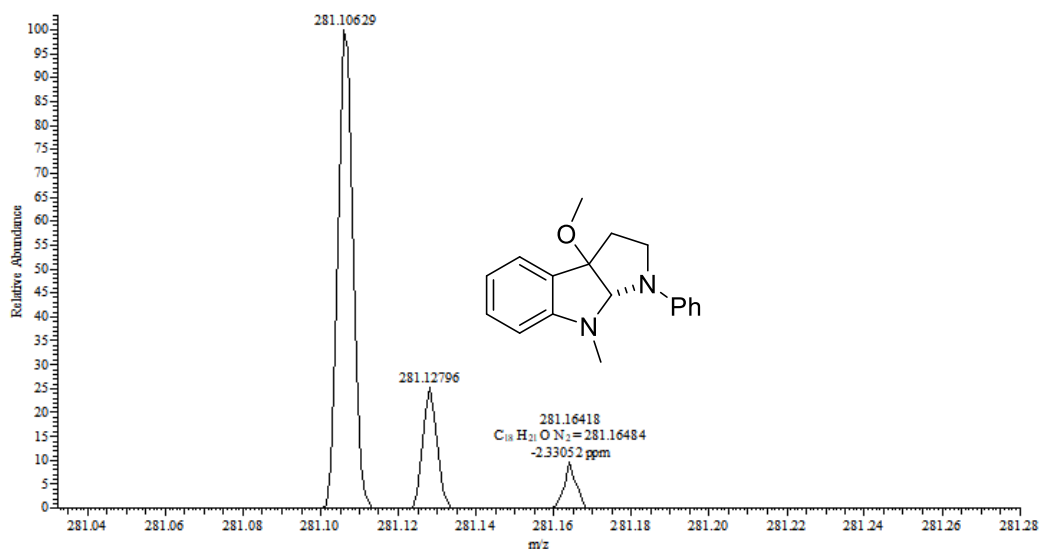

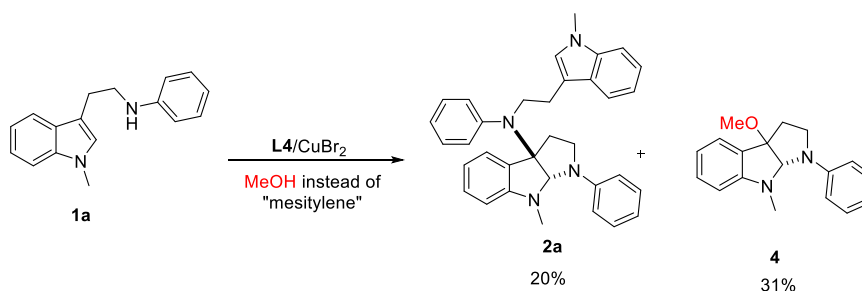

**Procedure:** A mixture of **1a** (50.1 mg, 0.2 mmol), CuBr<sub>2</sub> (4.5 mg, 0.02 mmol), **L4** (11.7 mg, 0.024 mmol), ZnI<sub>2</sub> (9.6mg, 0.03 mmol), NH<sub>4</sub>H<sub>2</sub>PO<sub>4</sub> (2.3mg, 0.02 mmol) and 4 Å MS (200 mg) in MeOH (2 mL) was stirred at 50 °C under O<sub>2</sub> balloon. After 4 h, the reaction was filtered through a glass funnel with thin layer (30 mm) of silica gel (100-200 mesh) and eluted with DCM/Ethyl Acetate. The filtrate was concentrated under reduced pressure, purified by flash chromatography (Petroleum ether/Ethyl acetate = 60/1) to afford the product **2a** and **4**.

### 3a-Methoxy-8-methyl-1-phenyl-1,2,3,3a,8,8a-hexahydropyrrolo[2,3-b]indole

(**4**)

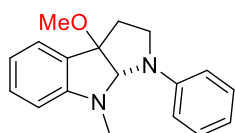

**4**

Light oil, 4 h, 17.2 mg, 31% yield; <sup>1</sup>H NMR (600 MHz, CDCl<sub>3</sub>) δ 7.29 – 7.24 (m, 2 H), 7.22 – 7.17 (m, 2 H), 6.90 (d, *J* = 7.6 Hz, 2 H), 6.81 – 6.74 (m, 2 H), 6.46 (d, *J* = 7.8 Hz, 1 H), 5.58 (s, 1 H), 3.52 (ddd, *J* = 9.4, 7.6, 4.8 Hz, 1 H), 3.34 (dt, *J* = 9.4, 7.2

Hz, 1 H), 3.17 (s, 3H), 2.90 (s, 3H), 2.44 – 2.38 (m, 1H), 2.37 – 2.32 (m, 1H) ppm.

<sup>13</sup>C NMR (150 MHz, CDCl<sub>3</sub>) δ 152.0, 147.5, 129.9, 129.1, 126.7, 123.6, 117.8, 117.8, 113.8, 107.3, 93.5, 85.7, 52.9, 47.7, 38.2, 35.2 ppm. HRMS (ESI) *m/z*: [M + H]<sup>+</sup>

Calcd for C<sub>18</sub>H<sub>21</sub>ON<sub>2</sub> 281.1648; Found 281.1642.



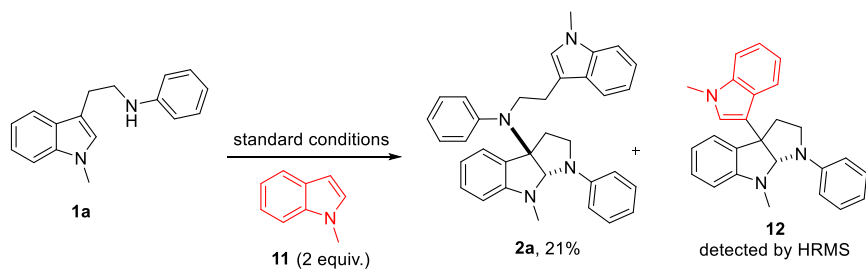

**Procedure:** A mixture of **1a** (50.1 mg, 0.2 mmol), **11** (52.5 mg, 0.4 mmol), CuBr<sub>2</sub> (4.5 mg, 0.02 mmol), **L4** (11.7 mg, 0.024 mmol), ZnI<sub>2</sub> (9.6 mg, 0.03 mmol), NH<sub>4</sub>H<sub>2</sub>PO<sub>4</sub> (2.3 mg, 0.02 mmol) and 4ÅMS (200 mg) in Mesitylene (2 mL) was stirred at 50 °C under O<sub>2</sub> balloon. After 48 hours of reaction, we stopped the reaction, The Yield of **2a** was isolated yield and compound **12** was confirmed by HRMS analysis.

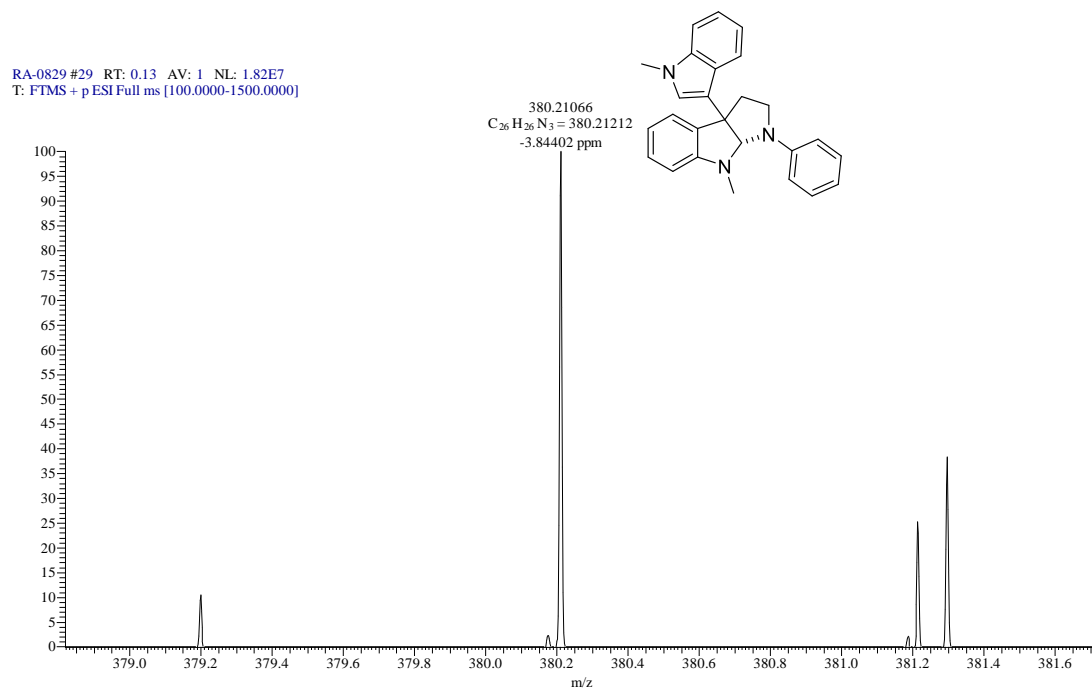

### 4.3 Control experiments

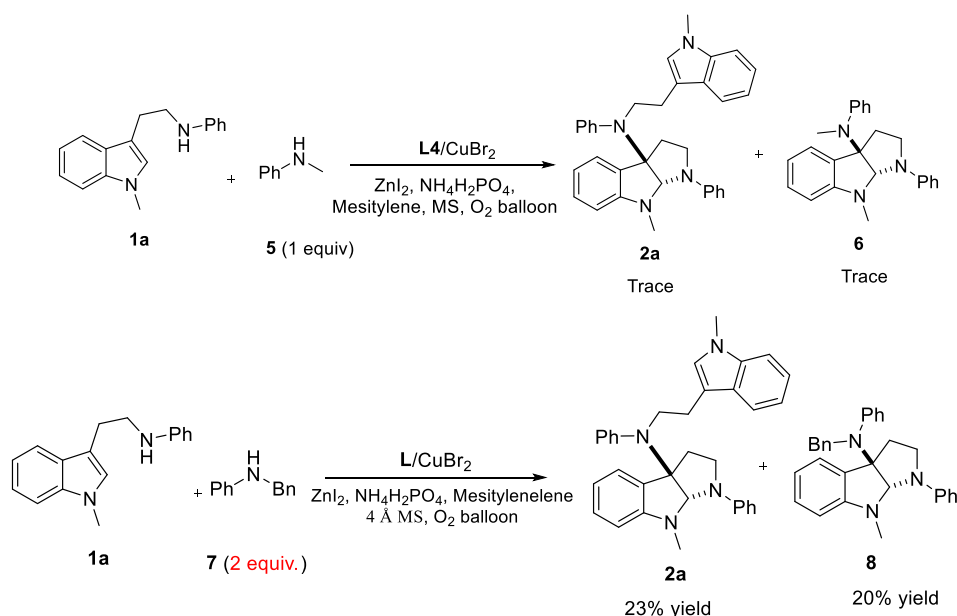

A mixture of  $\text{CuBr}_2$  (4.5 mg, 0.02 mmol), **L4** (11.7 mg, 0.024 mmol), **1a** (50.1 mg, 0.2 mmol), **7** (73.2 mg, 0.4 mmol),  $\text{ZnI}_2$  (9.6 mg, 0.03 mmol),  $\text{NH}_4\text{H}_2\text{PO}_4$  (2.3 mg, 0.02 mmol) and 4 Å MS (200 mg) in Mesitylene (2 mL) was stirred at 50 °C under  $\text{O}_2$  balloon. After 13 h, the reaction was filtered through a glass funnel with thin layer (30 mm) of silica gel (100-200 mesh) and eluted with DCM/Ethyl Acetate. The filtrate was concentrated under reduced pressure, purified by flash chromatography (Petroleum ether/Ethyl acetate = 60/1) to afford the product **2a** and **8**.

#### N-Benzyl-8-methyl-N,1-diphenyl-2,3,8,8a-tetrahydropyrrolo[2,3-b]indol-3a(1H)-amine (**8**)

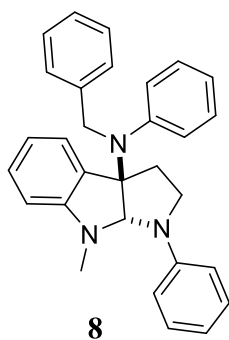

Light yellow oil, 13 h, 17.5 mg, 20% yield;  $^1\text{H NMR}$  (600 MHz,  $\text{CDCl}_3$ )  $\delta$  7.32 (d,  $J = 7.2$  Hz, 1 H), 7.23 – 7.15 (m, 7 H), 7.13 – 7.10 (m, 1 H), 7.08 – 7.03 (m, 2 H), 6.97 – 6.90 (m, 3 H), 6.71 – 6.78 (m, 4 H), 6.40 (d,  $J = 7.8$  Hz, 1 H), 5.84 (s, 1 H), 4.41 (d,  $J = 15.2$  Hz, 1 H), 4.28 (d,  $J = 15.2$  Hz, 1 H), 3.15 (q,  $J = 7.6$  Hz, 1 H), 3.10 – 3.04 (m, 1 H), 2.76 (s, 3 H), 2.68 (dt,  $J = 12.6, 7.7$  Hz, 1H), 2.32 – 2.25 (m, 1 H) ppm.  $^{13}\text{C NMR}$  (150MHz,  $\text{CDCl}_3$ )  $\delta$  151.6, 148.2, 147.2, 140.1, 130.9, 129.2, 129.1, 128.3, 128.0, 127.8, 126.5,

126.1, 123.6, 123.5, 117.6, 117.4, 113.7, 106.9, 86.4, 78.6, 56.1, 47.2, 37.6, 35.0 ppm.

**HRMS (ESI)  $m/z$ :**  $[M + H]^+$  Calcd for  $C_{30}H_{30}N_3$  432.2434; Found 432.2439.

#### 4.4 The influence of substituents of substrates

As showed below, substrates bearing side-chain moieties with *para*-substituted phenyl group, regardless of electron-donating, electron-withdrawing or highly steric groups, were well tolerated under this catalytic system. It was noted that the *meta*-substituted phenyl substrates were also found to be compatible, providing the desired products smoothly. However, when the *ortho*- (vicinal position) substituted substrates were employed in the conditions, the reaction did not take place. These results suggested that except the electronic property, the steric effect of the vicinal position on the aniline group also has great influence for the reaction.

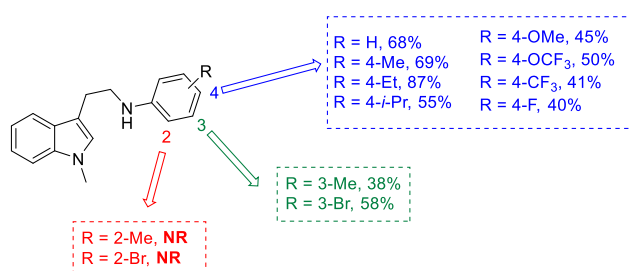

Furthermore, the influence of indole moiety of substrate was further studied. As showed below, the *N*-benzyl-, *N*-PMB- and *N*-allyl-substituted tryptamines were also found to be compatible, providing the desired products smoothly. However, when the indole *N*-free tryptamine was exposed to the optimal conditions, none of the desired product was detected. We speculate that the *N*-H moiety combined with the large aromatic indole system is unstable under the current oxidative conditions. It should be noted that when the electron-withdrawing group Ts or Boc substituted substrates were conducted in the standard conditions, the reaction did not happen. These results indicated that the electron property of indole moiety has great influence for the reaction.

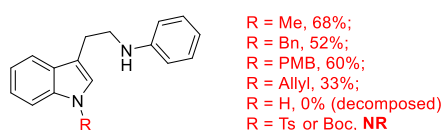

## 5. General Procedure for 3a-tryptamine-pyrroloindolines and product characterizations

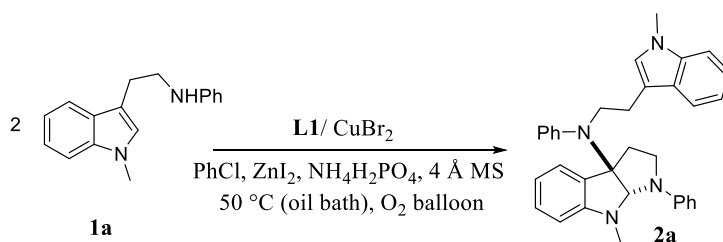

**General Procedure for 3a-tryptamine-pyrroloindolines:** A mixture of  $\text{CuBr}_2$  (4.5 mg, 0.02 mmol), **L1** (4.7 mg, 0.024 mmol), **1a** (50.1 mg, 0.2 mmol),  $\text{ZnI}_2$  (9.6 mg, 0.03 mmol),  $\text{NH}_4\text{H}_2\text{PO}_4$  (2.3 mg, 0.02 mmol) and 4 Å MS (200 mg) in  $\text{PhCl}$  (2 mL) was stirred at 50 °C under  $\text{O}_2$  balloon. After the reaction was completed (monitored by TLC), the reaction was filtered through a glass funnel with thin layer (30 mm) of silica gel (100-200 mesh) and eluted with DCM/Ethyl Acetate. The filtrate was concentrated under reduced pressure, purified by flash chromatography (Petroleum ether/Ethyl acetate = 60/1) to afford the product **2a**.

### 8-Methyl-N-(2-(1-methyl-1H-indol-3-yl)ethyl)-N,1-diphenyl-2,3,8,8a-tetrahydropyrrolo[2,3-b]indol-3a(1H)-amine (**2a**)

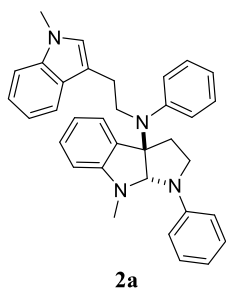

Following the general procedure for 3a-tryptamine-pyrroloindolines. The procedure was performed on **1a** (0.2 mmol),  $\text{CuBr}_2$  (0.02 mmol), **L4** (0.024 mmol), Mesitylene (2.0 mL),  $\text{ZnI}_2$  (0.03 mmol),  $\text{NH}_4\text{H}_2\text{PO}_4$  (0.02 mmol) to afford **2a**. White foam, 16 h, 33.9 mg, 68% yield;  $^1\text{H NMR}$  (600 MHz,  $\text{CDCl}_3$ )  $\delta$  7.28 – 7.24 (m, 2 H), 7.23 – 7.16 (m, 6 H), 7.15 – 7.12 (m, 4 H), 7.01 (t,  $J = 7.4$  Hz, 1 H), 6.73 – 6.69 (m, 3 H), 6.65 (d,  $J = 8.2$  Hz, 2 H), 6.36 (d,  $J = 7.8$  Hz, 1 H), 5.58 (s, 1 H), 3.68 (s, 3 H), 3.40 – 3.35 (m, 1 H), 3.34 – 3.28 (m, 1 H), 3.11–3.06 (m, 1 H), 2.94 – 2.88 (m, 1 H), 2.74 – 2.69 (m, 1H), 2.66 (s, 3 H), 2.64–2.59 (m, 1 H), 2.47 (dt,  $J = 12.4, 7.6$  Hz, 1H), 2.17 (ddd,  $J = 12.0, 6.8, 4.8$  Hz, 1H) ppm.  $^{13}\text{C NMR}$  (150 MHz,  $\text{CDCl}_3$ )  $\delta$  151.6, 147.8, 147.3, 136.9, 131.0, 129.0, 129.0, 128.5, 127.8, 126.6, 125.2, 123.6, 121.3, 119.0, 118.5, 117.4, 117.0, 113.3, 112.7,

109.0, 107.1, 86.5, 78.7, 52.4, 47.6, 37.1, 35.0, 32.5, 25.2 ppm. **HRMS (ESI)  $m/z$ :**  $[M + H]^+$  Calcd for  $C_{34}H_{35}N_4$  499.2856; Found 499.2854.

**8-Methyl-N-(2-(1-methyl-1*H*-indol-3-yl)ethyl)-N,1-di-*p*-tolyl-2,3,8,8a-tetrahydropyrrolo[2,3-*b*]indol-3a(1*H*)-amine (2b)**

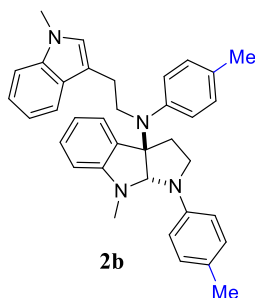

Yellow oil, 17 h, 36.6 mg, 69% yield;  **$^1H$  NMR** (600 MHz,  $CDCl_3$ )  $\delta$  7.28 – 7.23 (m, 2 H), 7.22 – 7.16 (m, 2 H), 7.13 (td,  $J = 7.8, 1.2$  Hz, 1 H), 7.02 (s, 4 H), 7.01 – 6.97 (m, 3 H), 6.72 – 6.67 (m, 2 H), 6.58 (d,  $J = 8.5$  Hz, 2 H), 6.33 (d,  $J = 7.8$  Hz, 1 H), 5.52 (s, 1 H), 3.68 (s, 3 H), 3.35 – 3.30 (m, 1 H), 3.28 – 3.23 (m, 1 H), 3.08 – 3.03 (m, 1 H), 2.95 – 2.91 (m, 1 H), 2.72 – 2.66 (m, 1 H), 2.64 (s, 3 H), 2.62 – 2.57 (m, 1 H), 2.42 (dt,  $J = 12.4, 7.8$  Hz, 1 H), 2.32 (s, 3 H), 2.26 (s, 3 H), 2.14 – 2.09 (m, 1 H) ppm.  **$^{13}C$  NMR** (150 MHz,  $CDCl_3$ )  $\delta$  151.9, 145.2, 145.1, 136.9, 134.9, 131.2, 129.5, 129.1, 129.1, 128.9, 127.9, 126.6, 126.1, 123.7, 121.3, 119.0, 118.5, 117.2, 113.5, 112.9, 109.0, 107.0, 86.8, 78.8, 52.5, 47.7, 37.2, 35.2, 32.5, 25.2, 21.0, 20.3 ppm. **HRMS (ESI)  $m/z$ :**  $[M + H]^+$  Calcd for  $C_{36}H_{39}N_4$  527.3169; Found 527.3168.

**N,1-bis(4-ethylphenyl)-8-methyl-N-(2-(1-methyl-1*H*-indol-3-yl)ethyl)-2,3,8,8a-tetrahydropyrrolo[2,3-*b*]indol-3a(1*H*)-amine (2c)**

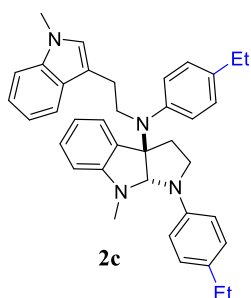

Light yellow oil, 9 h, 48.5 mg, 87% yield;  **$^1H$  NMR** (600 MHz,  $CDCl_3$ )  $\delta$  7.28 – 7.23 (m, 2 H), 7.22 – 7.16 (m, 2 H), 7.14 (td,  $J = 7.8, 1.2$  Hz, 1 H), 7.04 – 6.99 (m, 7 H), 6.72 – 6.67 (m, 2 H), 6.59 (d,  $J = 8.6$  Hz, 2 H), 6.34 (d,  $J = 7.8$  Hz, 1 H), 5.53 (s, 1 H), 3.67 (s, 3 H), 3.36 – 3.31 (m, 1 H), 3.29 – 3.23 (m, 1 H), 3.08 – 3.02 (m, 1 H), 2.95 – 2.91 (m, 1 H), 2.72 – 2.67 (m, 1 H), 2.64 (s, 3 H), 2.63 – 2.59 (m, 3 H), 2.56 (q,  $J = 7.6$  Hz, 2 H), 2.43 (dt,  $J = 12.4, 7.8$  Hz, 1 H), 2.13 (ddd,  $J = 12.2, 6.6, 4.2$  Hz, 1 H), 1.22 (dt,  $J = 10.8, 7.6$  Hz, 6 H) ppm.  **$^{13}C$  NMR** (150 MHz,  $CDCl_3$ )  $\delta$  151.9, 145.4, 145.3, 141.2, 136.9, 132.7, 131.2, 128.9, 128.9, 128.3, 127.9,

127.8, 126.6, 123.7, 121.3, 119.0, 118.5, 117.2, 113.5, 112.9, 109.0, 107.0, 86.8, 78.8, 52.4, 47.6, 37.2, 35.2, 32.5, 28.3, 27.8, 25.2, 15.9, 15.6 ppm. **HRMS (ESI)  $m/z$ :**  $[M + H]^+$  Calcd for  $C_{38}H_{43}N_4$  555.3482; Found 555.3483.

**8-Methyl-N-(2-(1-methyl-1*H*-indol-3-yl)ethyl)-N,1-bis(4-propylphenyl)-2,3,8,8a-tetrahydropyrrolo[2,3-*b*]indol-3a(1*H*)-amine (2d)**

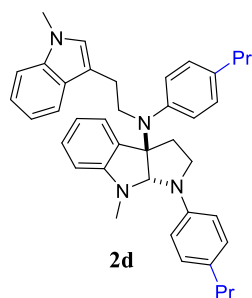

Light brown oil, 22 h, 32.2 mg, 55% yield;  **$^1H$  NMR** (600 MHz,  $CDCl_3$ )  $\delta$  7.28 – 7.23 (m, 2 H), 7.21 – 7.16 (m, 2 H), 7.15 – 7.12 (m, 1 H), 7.03 – 6.97 (m, 7 H), 6.71 – 6.68 (m, 2 H), 6.58 (d,  $J = 8.4$  Hz, 2 H), 6.34 (d,  $J = 7.8$  Hz, 1H), 5.53 (s, 1H), 3.67 (s, 3H), 3.37 – 3.31 (m, 1 H), 3.29 – 3.23 (m, 1 H), 3.05 (q,  $J = 7.6$  Hz, 1 H), 2.90 – 2.85 (m, 1 H), 2.72 – 2.67 (m, 1 H), 2.64 (s, 3H), 2.62 – 2.58 (m, 1 H), 2.57 – 2.52 (m, 2 H), 2.51 – 2.47 (m, 2 H), 2.43 (dt,  $J = 12.4, 7.6$  Hz, 1 H), 2.14 (ddd,  $J = 11.8, 6.6, 4.4$  Hz, 1 H), 1.65 – 1.57 (m, 4 H), 0.93 (td,  $J = 7.4, 2.8$  Hz, 6 H) ppm.  **$^{13}C$  NMR** (150 MHz,  $CDCl_3$ )  $\delta$  151.8, 145.4, 145.3, 139.7, 136.8, 131.2, 131.1, 128.9, 128.9, 128.4, 127.9, 126.6, 123.6, 121.3, 119.0, 118.5, 117.3, 113.3, 112.9, 109.0, 107.1, 86.8, 78.8, 52.5, 47.7, 37.5, 37.2, 37.1, 35.2, 32.5, 25.2, 24.8, 24.5, 13.8, 13.8 ppm. **HRMS (ESI)  $m/z$ :**  $[M + H]^+$  Calcd for  $C_{40}H_{47}N_4$  583.3795; Found 583.3793.

**N,1-bis(4-methoxyphenyl)-8-methyl-N-(2-(1-methyl-1*H*-indol-3-yl)ethyl)-2,3,8,8a-tetrahydropyrrolo[2,3-*b*]indol-3a(1*H*)-amine (2e)**

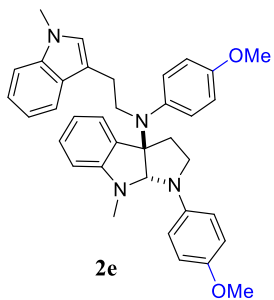

Following the general procedure for 3a-tryptamine-pyrroloindolines. The procedure was performed on **1e** (0.2 mmol),  $CuBr_2$  (0.03 mmol), **L1** (0.024 mmol),  $PhCl$  (2.0 mL),  $ZnI_2$  (0.03 mmol),  $NH_4H_2PO_4$  (0.02 mmol) to afford **2e**. Yellow oil, 48 h, 25.5 mg, 45% yield;  **$^1H$  NMR** (600 MHz,  $CDCl_3$ )  $\delta$  7.29 – 7.24 (m, 2 H), 7.21 – 7.16 (m, 2 H), 7.15 – 7.11 (m, 1 H), 7.06 – 7.00 (m, 3 H), 6.80 – 6.74 (m, 4 H), 6.72 – 6.67 (m, 2 H), 6.62 (d,  $J =$

9.0 Hz, 2 H), 6.33 (d,  $J = 7.8$  Hz, 1 H), 5.43 (s, 1 H), 3.79 (s, 3 H), 3.76 (s, 3 H), 3.69 (s, 3H), 3.34 – 3.28 (m, 1 H), 3.23 – 3.18 (m, 1 H), 3.04 (q,  $J = 8.4$  Hz, 1 H), 2.89 – 2.83 (m, 1 H), 2.72 – 2.66 (m, 1 H), 2.63 – 2.56 (m, 4 H), 2.40 (dt,  $J = 12.2, 7.8$  Hz, 1 H), 2.16 – 2.11 (m, 1 H) ppm.  $^{13}\text{C}$  NMR (150 MHz,  $\text{CDCl}_3$ )  $\delta$  157.4, 152.0, 151.8, 141.7, 140.7, 136.9, 131.2, 130.7, 128.8, 127.9, 126.6, 123.6, 121.3, 119.0, 118.5, 117.2, 115.0, 114.6, 113.5, 112.9, 109.0, 107.0, 87.7, 79.0, 55.7, 55.4, 52.8, 47.9, 37.5, 35.4, 32.5, 25.2 ppm. HRMS (ESI)  $m/z$ :  $[\text{M} + \text{H}]^+$  Calcd for  $\text{C}_{36}\text{H}_{39}\text{O}_2\text{N}_4$  559.3068; Found 559.3068.

**8-Methyl-N-(2-(1-methyl-1*H*-indol-3-yl)ethyl)-N,1-bis(4-(trifluoromethoxy)phenyl)-2,3,8,8a-tetrahydropyrrolo[2,3-*b*]indol-3a(1*H*)-amine (2f)**

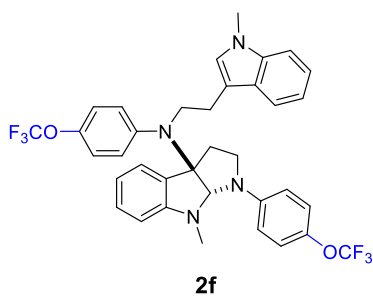

Following the general procedure for 3a-tryptamine-pyrroloindolines. The procedure was performed on **1f** (0.2 mmol),  $\text{CuBr}_2$  (0.02 mmol), **L4** (0.024 mmol), Mesitylene (2.0 mL),  $\text{ZnI}_2$  (0.03 mmol),  $\text{NH}_4\text{H}_2\text{PO}_4$  (0.02 mmol) to afford **2f**. Light oil, 17 h, 33.6

mg, 50% yield;  $^1\text{H}$  NMR (600 MHz,  $\text{CDCl}_3$ )  $\delta$  7.30 – 7.25 (m, 2 H), 7.22 – 7.15 (m, 3 H), 7.10 – 7.02 (m, 7 H), 6.73 (t,  $J = 7.4$  Hz, 1 H), 6.70 (s, 1 H), 6.54 (d,  $J = 9.2$  Hz, 2 H), 6.37 (d,  $J = 7.8$  Hz, 1H), 5.40 (s, 1 H), 3.68 (s, 3 H), 3.44 – 3.36 (m, 1 H), 3.31 – 3.24 (m, 1 H), 3.07 (q,  $J = 7.5$  Hz, 1 H), 2.91 – 2.84 (m, 1 H), 2.75 – 2.66 (m, 1 H), 2.66 – 2.56 (m, 4 H), 2.44 (dt,  $J = 12.4, 7.7$  Hz, 1 H), 2.20 (ddd,  $J = 12.0, 6.8, 4.4$  Hz, 1 H) ppm.  $^{13}\text{C}$  NMR (150 MHz,  $\text{CDCl}_3$ )  $\delta$  151.5, 146.5, 146.4, 145.8, 140.3, 136.9, 130.1, 130.0, 129.3, 127.7, 126.7, 123.6, 122.2, 121.5, 121.0, 120.7(q,  $^1J_{\text{C-F}} = 254.0$  Hz), 120.4(q,  $^1J_{\text{C-F}} = 255.2$  Hz), 118.8, 118.6, 117.7, 113.5, 112.3, 109.2, 107.4, 86.9, 78.8, 52.3, 47.9, 36.9, 35.1, 32.5, 25.1 ppm.  $^{19}\text{F}$  NMR (565 MHz,  $\text{CDCl}_3$ )  $\delta$  -57.93, -58.39 ppm. HRMS (ESI)  $m/z$ :  $[\text{M} + \text{H}]^+$  Calcd for  $\text{C}_{36}\text{H}_{33}\text{O}_2\text{N}_4\text{F}_6$  667.2502; Found 667.2485.

**8-Methyl-N-(2-(1-methyl-1*H*-indol-3-yl)ethyl)-N,1-bis(4-(trifluoromethyl)phenyl)-2,3,8,8a-tetrahydropyrrolo[2,3-*b*]indol-3a(1*H*)-amine (2g)**

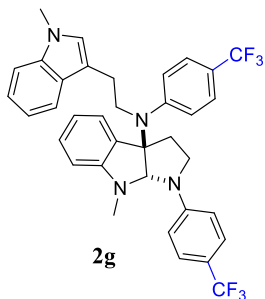

Following the general procedure for 3a-tryptamine-pyrroloindolines. The procedure was performed on **1g** (0.2 mmol), CuBr<sub>2</sub> (0.02 mmol), **L1** (0.024 mmol), PhCl (2.0 mL), ZnI<sub>2</sub> (0.03 mmol), NH<sub>4</sub>H<sub>2</sub>PO<sub>4</sub> (0.02 mmol) to afford **2g**. Brown oil, 48 h, 26.3 mg, 41% yield; <sup>1</sup>H NMR (600 MHz, CDCl<sub>3</sub>) δ 7.48 (d, *J* = 8.4 Hz, 2 H), 7.42 (d, *J* = 8.4 Hz, 2 H), 7.29 – 7.24 (m, 2 H), 7.23 – 7.18 (m, 2 H), 7.17 – 7.11 (m, 3 H), 7.05 (t, *J* = 7.2 Hz, 1H), 6.75 (t, *J* = 7.4 Hz, 1 H), 6.67 – 6.63 (m, 3 H), 6.42 (d, *J* = 7.8 Hz, 1 H), 5.57 (s, 1 H), 3.69 (s, 3 H), 3.56 – 3.49 (m, 1 H), 3.49 – 3.43 (m, 1 H), 3.22 – 3.13 (m, 2 H), 2.80 – 2.74 (m, 1 H), 2.70 (s, 3 H), 2.68 – 2.60 (m, 2 H), 2.22 (ddd, *J* = 12.6, 6.6, 4.2 Hz, 1 H) ppm. <sup>13</sup>C NMR (150 MHz, CDCl<sub>3</sub>) δ 151.2, 150.8, 149.4, 136.9, 129.8, 129.6, 129.2, 127.6, 126.7, 126.5, 125.7, 123.9, 121.6, 118.9, 118.8, 117.9, 113.0, 112.5, 111.9, 109.2, 107.3, 85.9, 78.3, 51.5, 47.5, 36.6, 34.7, 32.5, 25.0 ppm. <sup>19</sup>F NMR (565 MHz, CDCl<sub>3</sub>) δ -61.05, -61.88 ppm. HRMS (ESI) *m/z*: [M + H]<sup>+</sup> Calcd for C<sub>36</sub>H<sub>33</sub>N<sub>4</sub>F<sub>6</sub> 635.2604; Found 635.2597

**N,1-bis(4-fluorophenyl)-8-methyl-N-(2-(1-methyl-1*H*-indol-3-yl)ethyl)-2,3,8,8a-tetrahydropyrrolo[2,3-*b*]indol-3a(1*H*)-amine (2h)**

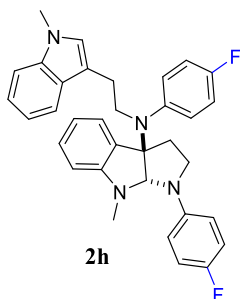

Following the general procedure for 3a-tryptamine-pyrroloindolines. The procedure was performed on **1h** (0.2 mmol), CuBr<sub>2</sub> (0.02 mmol), **L4** (0.024 mmol), Mesitylene (2.0 mL), ZnI<sub>2</sub> (0.03 mmol), NH<sub>4</sub>H<sub>2</sub>PO<sub>4</sub> (0.02 mmol) to afford **2h**. Brown oil, 17 h, 21.2 mg, 40% yield; <sup>1</sup>H NMR (600 MHz, CDCl<sub>3</sub>) δ 7.29 – 7.24 (m, 2 H), 7.21 – 7.12 (m, 3 H), 7.08 – 7.00 (m, 3 H), 6.94 – 6.87 (m, 4 H), 6.74 – 6.67 (m, 2 H), 6.57 – 6.52 (m, 2 H), 6.34 (d, *J* = 7.8 Hz, 1 H), 5.39 (s, 1 H), 3.69 (s, 3 H), 3.39 – 3.32 (m, 1 H), 3.26 – 3.20 (m, 1 H), 3.05 (q, *J* = 8.2 Hz, 1 H), 2.85 (td, *J* =



8.8, 8.2, 4.4 Hz, 1 H), 2.72 – 2.66 (m, 1 H), 2.62 – 2.54 (m, 4 H), 2.40 (dt,  $J = 12.4$ , 7.8 Hz, 1 H), 2.21 – 2.13 (m, 1 H) ppm.  $^{13}\text{C}$  NMR (150 MHz,  $\text{CDCl}_3$ )  $\delta$  160.6 (d,  $^1J_{\text{C-F}} = 243.0$  Hz), 155.7 (d,  $^1J_{\text{C-F}} = 235.6$  Hz), 151.8, 143.8 (d,  $^4J_{\text{C-F}} = 3.0$  Hz), 143.6 (d,  $^4J_{\text{C-F}} = 1.6$  Hz), 136.9, 131.0 (d,  $^3J_{\text{C-F}} = 9.0$  Hz), 130.6, 129.1, 127.8, 126.6, 123.6, 121.4, 118.9, 118.6, 117.5, 115.4 (d,  $^2J_{\text{C-F}} = 22.5$  Hz), 115.1 (d,  $^2J_{\text{C-F}} = 22.5$  Hz), 114.4 (d,  $^3J_{\text{C-F}} = 6.0$  Hz), 112.5, 109.1, 107.3, 87.4, 79.0, 52.7, 48.0, 37.2, 35.3, 32.5, 25.1 ppm.  $^{19}\text{F}$  NMR (565 MHz,  $\text{CDCl}_3$ )  $\delta$  -116.53, -128.01 ppm. HRMS (ESI)  $m/z$ :  $[\text{M} + \text{H}]^+$  Calcd for  $\text{C}_{34}\text{H}_{33}\text{N}_4\text{F}_2$  535.2668; Found 535.2666.

**8-Methyl-N-(2-(1-methyl-1*H*-indol-3-yl)ethyl)-N,1-di-*m*-tolyl-2,3,8a-tetrahydro pyrrolo[2,3-*b*]indol-3a(1*H*)-amine (2i)**

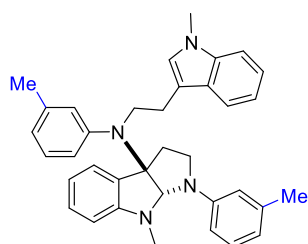

**2i**

Following the general procedure for 3a-tryptamine-pyrroloindolines. The procedure was performed on **1i** (0.2 mmol),  $\text{CuBr}_2$  (0.02 mmol), **L4** (0.024 mmol), Mesitylene (2.0 mL),  $\text{ZnI}_2$  (0.03 mmol),  $\text{NH}_4\text{H}_2\text{PO}_4$  (0.02 mmol) to afford **2i**. Light yellow oil, 27 h, 20.1 mg, 38% yield;  $^1\text{H}$  NMR (600 MHz,  $\text{CDCl}_3$ )  $\delta$  7.25 – 7.21 (m, 3 H), 7.19 – 7.06 (m, 4 H), 7.02 – 6.96 (m, 2 H), 6.94 (d,  $J = 7.6$  Hz, 1 H), 6.86 (s, 1 H), 6.72 (t,  $J = 7.2$  Hz, 1 H), 6.69 (s, 1 H), 6.55 (d,  $J = 7.4$  Hz, 1 H), 6.49 (d,  $J = 8.6$  Hz, 1H), 6.46 (s, 1 H), 6.36 (d,  $J = 7.8$  Hz, 1 H), 5.63 (s, 1 H), 3.67 (s, 3 H), 3.37 – 3.29 (m, 1H), 3.29 – 3.19 (m, 1 H), 3.07 (q,  $J = 7.2$  Hz, 1 H), 2.75 – 2.66 (m, 5 H), 2.65 – 2.58 (m, 1 H), 2.47 – 2.40 (m, 1 H), 2.29 (s, 3 H), 2.20 – 2.13 (m, 1 H), 2.09 (s, 3 H) ppm.  $^{13}\text{C}$  NMR (150 MHz,  $\text{CDCl}_3$ )  $\delta$  151.1, 147.6, 147.4, 138.7, 138.2, 136.8, 131.5, 129.5, 128.9, 128.8, 128.0, 127.8, 126.5, 126.5, 126.1, 123.3, 121.3, 119.0, 118.5, 117.8, 117.4, 113.7, 112.8, 110.2, 109.0, 106.9, 86.4, 78.7, 52.7, 47.9, 37.0, 34.7, 32.5, 25.2, 21.8, 21.1 ppm. HRMS (ESI)  $m/z$ :  $[\text{M} + \text{H}]^+$  Calcd for  $\text{C}_{36}\text{H}_{39}\text{N}_4$  527.3169; Found 527.3156.

**N,1-bis(3-bromophenyl)-8-methyl-N-(2-(1-methyl-1*H*-indol-3-yl)ethyl)-2,3,8,8a-tetrahydropyrrolo[2,3-*b*]indol-3a(1*H*)-amine (2j)**

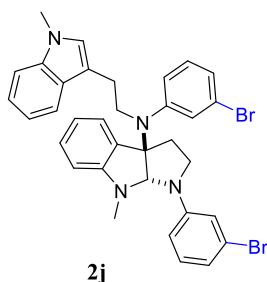

Following the general procedure for 3a-tryptamine-pyrroloindolines.

The procedure was performed on **1j** (0.2 mmol), CuBr<sub>2</sub> (0.02 mmol), **L4** (0.024 mmol), Mesitylene (2.0 mL), ZnI<sub>2</sub> (0.03 mmol), NH<sub>4</sub>H<sub>2</sub>PO<sub>4</sub> (0.02 mmol) to afford **2j**. Light yellow oil, 39 h, 38.4 mg, 58% yield; <sup>1</sup>H NMR (600 MHz, CDCl<sub>3</sub>) δ 7.31 – 7.27 (m, 3 H), 7.25

– 7.17 (m, 4 H), 7.13 (t, *J* = 7.8 Hz, 1 H), 7.06 (t, *J* = 7.8 Hz, 3 H), 6.87 (d, *J* = 8.0 Hz, 1 H), 6.81 (s, 1 H), 6.76 (t, *J* = 7.4 Hz, 1 H), 6.72 (s, 1 H), 6.59 (d, *J* = 8.2 Hz, 1 H), 6.41 (d, *J* = 7.8 Hz, 1 H), 5.49 (s, 1 H), 3.73 (s, 3 H), 3.44 – 3.37 (m, 1 H), 3.34 – 3.28 (m, 1 H), 3.10 (q, *J* = 7.8 Hz, 1 H), 2.95 – 2.90 (m, 1 H), 2.78 – 2.63 (m, 5 H), 2.52 – 2.46 (m, 1 H), 2.25 – 2.18 (m, 1 H) ppm. <sup>13</sup>C NMR (150 MHz, CDCl<sub>3</sub>) δ 151.3, 149.3, 148.3, 136.9, 131.5, 130.3, 130.2, 129.7, 129.3, 128.1, 127.7, 127.1, 126.7, 123.5, 123.4, 122.1, 121.5, 120.1, 118.8, 118.7, 117.8, 116.1, 112.2, 111.9, 109.2, 107.3, 86.4, 78.7, 52.2, 47.7, 36.7, 35.0, 32.5, 25.1 ppm. HRMS (ESI) *m/z*: [M + H]<sup>+</sup> Calcd for C<sub>34</sub>H<sub>33</sub>N<sub>4</sub>Br<sub>2</sub> 655.1066; Found 655.1079.

**5-Bromo-N-(2-(5-bromo-1-methyl-1*H*-indol-3-yl)ethyl)-8-methyl-N,1-diphenyl-2,3,8,8a-tetrahydropyrrolo[2,3-*b*]indol-3a(1*H*)-amine (2k)**

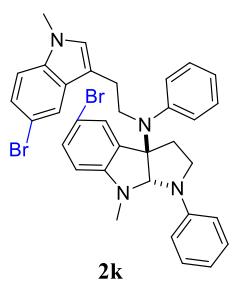

Following the general procedure for 3a-tryptamine-pyrroloindolines.

The procedure was performed on **1k** (0.2 mmol), CuBr<sub>2</sub> (0.03 mmol), **L1** (0.024 mmol), PhCl (2.0 mL), ZnI<sub>2</sub> (0.03 mmol), NH<sub>4</sub>H<sub>2</sub>PO<sub>4</sub> (0.02 mmol) to afford **2k**. Light yellow oil, 17 h, 40.8 mg, 62% yield; <sup>1</sup>H

NMR (600 MHz, CDCl<sub>3</sub>) δ 7.38 (d, *J* = 1.9 Hz, 1 H), 7.28 – 7.16 (m, 8 H), 7.15 – 7.09 (m, 3 H), 6.73 (t, *J* = 7.4 Hz, 1 H), 6.71 (s, 1 H), 6.63 (d, *J* = 8.0 Hz, 2 H), 6.24 (d, *J* = 8.2 Hz, 1 H), 5.58 (s, 1 H), 3.68 (s, 3 H), 3.28 (t, *J* = 7.4 Hz, 2 H), 3.10 – 3.02 (m, 1 H), 2.90 – 2.84 (m, 1 H), 2.67 (s, 3 H), 2.66 – 2.59 (m, 1 H), 2.59 – 2.52 (m, 1 H), 2.38 (dt, *J* = 12.6, 7.6 Hz, 1 H), 2.06 (ddd, *J* = 11.4, 6.4, 4.4 Hz, 1 H) ppm. <sup>13</sup>C NMR (150 MHz, CDCl<sub>3</sub>) δ 150.4, 147.1, 147.0, 135.5, 133.2, 131.8, 129.2,

129.1, 128.6, 127.9, 126.9, 126.4, 125.7, 124.2, 121.4, 117.3, 113.2, 112.3, 112.1, 110.7, 108.8, 108.3, 86.3, 78.5, 52.1, 47.5, 37.0, 34.6, 32.7, 24.7 ppm. **HRMS (ESI)**  $m/z$ :  $[M + H]^+$  Calcd for  $C_{34}H_{33}N_4Br_2$  655.1066; Found 655.1070.

**7-Ethyl-N-(2-(7-ethyl-1-methyl-1H-indol-3-yl)ethyl)-8-methyl-N,1-diphenyl-2,3,8,8a-tetrahydropyrrolo[2,3-b]indol-3a(1H)-amine (2l)**

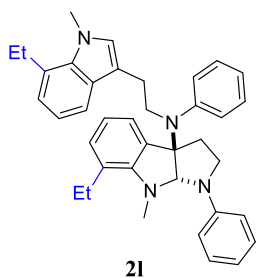

Following the general procedure for 3a-tryptamine-pyrroloindolines. The procedure was performed on **1l** (0.2 mmol),  $CuBr_2$  (0.02 mmol), **L4** (0.024 mmol), Mesitylene (2.0 mL),  $ZnI_2$  (0.03 mmol),  $NH_4H_2PO_4$  (0.02 mmol) to afford **2l**. Light yellow oil, 19 h, 24.7 mg, 44% yield;  **$^1H$  NMR** (600 MHz,  $CDCl_3$ )  $\delta$  7.28 – 7.23 (m, 2 H), 7.22 – 7.17 (m, 2 H), 7.15 – 7.11 (m, 2 H), 7.06 – 7.02 (m, 3 H), 6.99 (d,  $J = 7.6$  Hz, 1 H), 6.94 (d,  $J = 4.8$  Hz, 2 H), 6.82 (t,  $J = 7.6$  Hz, 1 H), 6.70 (t,  $J = 7.4$  Hz, 1 H), 6.64 (s, 1 H), 6.61 (d,  $J = 8.0$  Hz, 2 H), 5.20 (s, 1 H), 3.93 (s, 3 H), 3.49 – 3.42 (m, 1 H), 3.40 – 3.30 (m, 1 H), 3.29 (t,  $J = 8.4$  Hz, 1 H), 3.07 (q,  $J = 7.4$  Hz, 2 H), 2.90 (td,  $J = 10.0, 9.4, 5.8$  Hz, 1 H), 2.72 – 2.65 (m, 1 H), 2.61 – 2.53 (m, 2 H), 2.50 – 2.44 (m, 4 H), 2.44 – 2.36 (m, 1 H), 2.33 (dd,  $J = 12.0, 4.8$  Hz, 1 H), 1.33 (t,  $J = 7.4$  Hz, 3 H), 1.01 (t,  $J = 7.4$  Hz, 3 H) ppm.  **$^{13}C$  NMR** (150 MHz,  $CDCl_3$ )  $\delta$  152.1, 148.5, 146.6, 134.9, 132.6, 129.6, 129.4, 129.2, 128.8, 128.7, 128.6, 128.5, 127.7, 125.4, 122.3, 121.9, 120.4, 119.0, 116.9, 116.6, 114.0, 112.6, 89.7, 78.7, 52.0, 46.4, 40.9, 36.4, 35.8, 25.4, 25.1, 24.7, 16.7, 13.8 ppm. **HRMS (ESI)**  $m/z$ :  $[M + H]^+$  Calcd for  $C_{38}H_{43}N_4$  555.3482; Found 555.3482.

**5-Fluoro-N-(2-(5-fluoro-1-methyl-1H-indol-3-yl)ethyl)-8-methyl-N,1-di-p-tolyl-2,3,8,8a-tetrahydropyrrolo[2,3-b]indol-3a(1H)-amine (2m)**

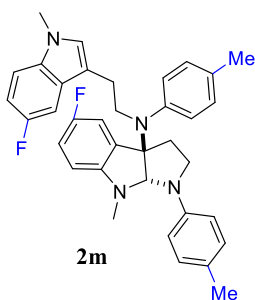

Following the general procedure for 3a-tryptamine-pyrroloindolines. The procedure was performed on **1m** (0.2 mmol),  $CuBr_2$  (0.02 mmol), **L4** (0.024 mmol), Mesitylene (2.0 mL),  $ZnI_2$  (0.03 mmol),  $NH_4H_2PO_4$  (0.02 mmol) to afford **2m**. Light yellow oil, 24 h, 31.6

mg, 56% yield;  $^1\text{H NMR}$  (600 MHz,  $\text{CDCl}_3$ )  $\delta$  7.15 (dd,  $J = 8.7, 4.2$  Hz, 1 H), 7.07 – 6.97 (m, 6 H), 6.95 – 6.88 (m, 2 H), 6.87 (dd,  $J = 8.4, 2.8$  Hz, 1 H), 6.82 (td,  $J = 8.8, 2.8$  Hz, 1 H), 6.74 (s, 1 H), 6.57 (d,  $J = 8.4$  Hz, 2 H), 6.24 (dd,  $J = 8.5, 4.1$  Hz, 1 H), 5.53 (s, 1 H), 3.68 (s, 3 H), 3.24 (t,  $J = 7.4$  Hz, 2 H), 3.03 (q,  $J = 7.4$  Hz, 1 H), 2.92 – 2.85 (m, 1 H), 2.65 – 2.58 (m, 4 H), 2.58 – 2.51 (m, 1 H), 2.39 – 2.31 (m, 4 H), 2.26 (s, 3 H), 2.11 – 2.03 (m, 1 H) ppm.  $^{13}\text{C NMR}$  (150 MHz,  $\text{CDCl}_3$ )  $\delta$  157.4 (d,  $^1J_{\text{C-F}} = 232.4$  Hz), 156.3 (d,  $^1J_{\text{C-F}} = 234.0$  Hz), 148.0, 144.9, 144.6, 135.4, 133.5, 132.7 (d,  $^3J_{\text{C-F}} = 6.0$  Hz), 129.6, 129.2, 129.2, 128.3, 128.0 (d,  $^3J_{\text{C-F}} = 10.5$  Hz), 126.3, 115.4 (d,  $^2J_{\text{C-F}} = 24.0$  Hz), 113.5, 112.7 (d,  $^4J_{\text{C-F}} = 4.6$  Hz), 110.8 (d,  $^2J_{\text{C-F}} = 22.6$  Hz), 109.7 (d,  $^4J_{\text{C-F}} = 3.0$  Hz), 109.6 (d,  $^2J_{\text{C-F}} = 15.0$  Hz), 107.5 (d,  $^3J_{\text{C-F}} = 7.4$  Hz), 103.7 (d,  $^2J_{\text{C-F}} = 22.6$  Hz), 87.3, 78.6, 52.3, 47.6, 37.0, 35.9, 32.8, 25.0, 21.0, 20.3 ppm.  $^{19}\text{F NMR}$  (565 MHz,  $\text{CDCl}_3$ )  $\delta$  -125.91, -127.38. ppm. **HRMS (ESI)**  $m/z$ :  $[\text{M} + \text{H}]^+$  Calcd for  $\text{C}_{36}\text{H}_{37}\text{N}_4\text{F}_2$  563.2981; Found 563.2977.

**4-Fluoro-N-(2-(4-fluoro-1-methyl-1H-indol-3-yl)ethyl)-8-methyl-N,1-di-p-tolyl-2,3,8a-tetrahydropyrrolo[2,3-b]indol-3a(1H)-amine (2n)**

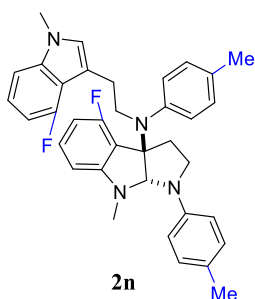

Following the general procedure for 3a-tryptamine-pyrroloindolines.

The procedure was performed on **1n** (0.2 mmol),  $\text{CuBr}_2$  (0.02 mmol), **L4** (0.024 mmol), Mesitylene (2.0 mL),  $\text{ZnI}_2$  (0.03 mmol),  $\text{NH}_4\text{H}_2\text{PO}_4$  (0.02 mmol) to afford **2n**. Light yellow oil, 22 h, 34.1 mg, 60% yield;

$^1\text{H NMR}$  (600 MHz,  $\text{CDCl}_3$ )  $\delta$  7.09 – 7.04 (m, 1 H), 7.04 – 6.96 (m, 8 H), 6.71 – 6.63 (m, 2 H), 6.58 (d,  $J = 8.2$  Hz, 2 H), 6.30 (t,  $J = 8.8$  Hz, 1 H), 6.01 (d,  $J = 7.8$  Hz, 1 H), 5.42 (s, 1 H), 3.66 (s, 3 H), 3.55 – 3.48 (m, 1 H), 3.40 – 3.33 (m, 1 H), 3.28 – 3.22 (m, 1 H), 3.14 – 3.07 (m, 1 H), 2.79 – 2.72 (m, 1 H), 2.72 – 2.65 (m, 1 H), 2.52 (s, 3 H), 2.47 – 2.39 (m, 2 H), 2.29 (s, 3 H), 2.24 (s, 3 H) ppm.  $^{13}\text{C NMR}$  (150 MHz,  $\text{CDCl}_3$ )  $\delta$  159.4 (d,  $^1J_{\text{C-F}} = 224.6$  Hz), 157.2 (d,  $^1J_{\text{C-F}} = 246.0$  Hz), 154.9 (d,  $^3J_{\text{C-F}} = 9$  Hz), 145.1, 144.8, 139.8 (d,  $^2J_{\text{C-F}} = 12.0$  Hz), 134.6, 130.6, 130.5 (d,  $^3J_{\text{C-F}} = 9$  Hz), 129.0, 128.6, 127.1, 126.4, 121.6 (d,  $^3J_{\text{C-F}} = 6$  Hz), 116.4 (d,  $^2J_{\text{C-F}} = 19.6$  Hz), 115.4 (d,  $^2J_{\text{C-F}} = 18.0$  Hz), 114.0, 111.7 (d,  $^3J_{\text{C-F}} = 7.5$  Hz), 105.2 (d,  $^4J_{\text{C-F}} = 4.6$  Hz),

104.6 (d,  $^3J_{C-F} = 7.6$  Hz), 103.8 (d,  $^2J_{C-F} = 19.5$  Hz), 103.0 (d,  $^4J_{C-F} = 3.0$  Hz), 87.3, 78.8, 52.6, 47.8, 35.4, 32.8, 26.3, 20.9, 20.3 ppm.  $^{19}\text{F}$  NMR (565 MHz,  $\text{CDCl}_3$ )  $\delta$  -116.38, -123.25 ppm. **HRMS (ESI)  $m/z$ :**  $[\text{M} + \text{H}]^+$  Calcd for  $\text{C}_{36}\text{H}_{37}\text{N}_4\text{F}_2$  563.2981; Found 563.2985.

**N,1-bis(4-ethylphenyl)-4-fluoro-N-(2-(4-fluoro-1-methyl-1H-indol-3-yl)ethyl)-8-methyl-2,3,8,8a-tetrahydropyrrolo[2,3-b]indol-3a(1H)-amine (2o)**

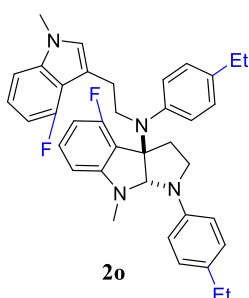

Following the general procedure for 3a-tryptamine-pyrroloindolines. The procedure was performed on **1o** (0.2 mmol),  $\text{CuBr}_2$  (0.03 mmol), **L1** (0.024 mmol),  $\text{PhCl}$  (2.0 mL),  $\text{ZnI}_2$  (0.03 mmol),  $\text{NH}_4\text{H}_2\text{PO}_4$  (0.02 mmol) to afford **2o**. Light yellow oil, 48 h, 17.5 mg, 30 % yield;  $^1\text{H}$  NMR (600 MHz,  $\text{CDCl}_3$ )  $\delta$  7.12 – 6.97 (m, 9 H), 6.73 – 6.67 (m, 2 H), 6.62 (d,  $J = 8.0$  Hz, 2 H), 6.33 (t,  $J = 8.8$  Hz, 1 H), 6.04 (d,  $J = 7.8$  Hz, 1 H), 5.44 (s, 1 H), 3.69 (s, 3 H), 3.59 – 3.49 (m, 1 H), 3.43 – 3.35 (m, 1 H), 3.32 – 3.24 (m, 1 H), 3.13 (q,  $J = 8.2$  Hz, 1 H), 2.82 – 2.74 (m, 1 H), 2.75 – 2.68 (m, 1 H), 2.61 (q,  $J = 7.6$  Hz, 2 H), 2.57 (q,  $J = 7.8$  Hz, 2 H), 2.53 (s, 3 H), 2.49 – 2.43 (m, 2 H), 1.26 – 1.18 (m, 6 H) ppm.  $^{13}\text{C}$  NMR (150 MHz,  $\text{CDCl}_3$ )  $\delta$  159.4 (d,  $^1J_{C-F} = 244.6$  Hz), 157.2 (d,  $^1J_{C-F} = 244.6$  Hz), 155.0, 145.3, 145.0, 140.9, 139.8 (d,  $^2J_{C-F} = 12.0$  Hz), 133.0, 130.5 (d,  $^3J_{C-F} = 9.0$  Hz), 128.5, 128.3, 127.7, 127.1, 121.6 (d,  $^3J_{C-F} = 7.6$  Hz), 116.5 (d,  $^2J_{C-F} = 21$  Hz), 115.5 (d,  $^2J_{C-F} = 18.0$  Hz), 113.8, 111.7, 105.2 (d,  $^4J_{C-F} = 3.0$  Hz), 104.6 (d,  $^2J_{C-F} = 22.6$  Hz), 103.8 (d,  $^2J_{C-F} = 19.5$  Hz), 103.0, 87.2, 78.9, 52.6, 47.8, 35.4, 35.3, 32.8, 28.3, 27.8, 26.3, 15.9, 15.5.  $^{19}\text{F}$  NMR (565 MHz,  $\text{CDCl}_3$ )  $\delta$  -116.47, -123.28 ppm. **HRMS (ESI)  $m/z$ :**  $[\text{M} + \text{H}]^+$  Calcd for  $\text{C}_{38}\text{H}_{41}\text{N}_4\text{F}_2$  591.3294; Found 591.3298.

**N-(2-(1,5-dimethyl-1H-indol-3-yl)ethyl)-N,1-bis(4-ethylphenyl)-5,8-dimethyl-2,3,8,8a-tetrahydropyrrolo[2,3-b]indol-3a(1H)-amine (2p)**

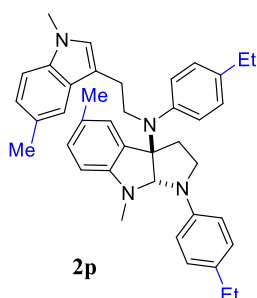

Following the general procedure for 3a-tryptamine-pyrroloindolines. The procedure was performed on **1p** (0.2 mmol),  $\text{CuBr}_2$  (0.02 mmol), **L4** (0.024 mmol), Mesitylene

(2.0 mL), ZnI<sub>2</sub> (0.03 mmol), NH<sub>4</sub>H<sub>2</sub>PO<sub>4</sub> (0.02 mmol) to afford **2p**. Brown oil, 26 h, 36.0 mg, 62% yield; <sup>1</sup>H NMR (600 MHz, CDCl<sub>3</sub>) δ 7.12 (d, *J* = 8.8 Hz, 1 H), 7.06 – 6.98 (m, 9 H), 6.96 (d, *J* = 7.8 Hz, 1 H), 6.65 (s, 1 H), 6.59 (d, *J* = 8.6 Hz, 2 H), 6.28 (d, *J* = 7.8 Hz, 1 H), 5.53 (s, 1 H), 3.64 (s, 3 H), 3.38 – 3.30 (m, 1 H), 3.25 – 3.18 (m, 1 H), 3.08 – 3.01 (m, 1 H), 2.88 – 2.82 (m, 1 H), 2.72 – 2.63 (m, 4 H), 2.63 – 2.57 (m, 3 H), 2.57 – 2.53 (m, 2 H), 2.47 – 2.40 (m, 1 H), 2.39 (s, 3 H), 2.29 (s, 3 H), 2.15 – 2.09 (m, 1 H), 1.22 (dt, *J* = 12.8, 7.6 Hz, 6 H) ppm. <sup>13</sup>C NMR (150 MHz, CDCl<sub>3</sub>) δ 149.8, 145.4, 145.4, 141.1, 135.3, 132.6, 131.7, 129.3, 129.0, 128.3, 128.1, 127.8, 127.6, 126.7, 126.6, 124.3, 122.9, 118.7, 113.4, 112.2, 108.7, 107.2, 87.2, 78.9, 52.6, 47.6, 37.0, 35.8, 32.5, 28.3, 27.8, 25.4, 21.3, 20.9, 15.9, 15.6 ppm. HRMS (ESI) *m/z*: [M + H]<sup>+</sup> Calcd for C<sub>40</sub>H<sub>47</sub>N<sub>4</sub> 583.3795; Found 583.3790.

**6-Chloro-N-(2-(6-chloro-1-methyl-1*H*-indol-3-yl)ethyl)-N,1-bis(4-ethylphenyl)-8-methyl-2,3,8,8a-tetrahydropyrrolo[2,3-*b*]indol-3a(1*H*)-amine (2q)**

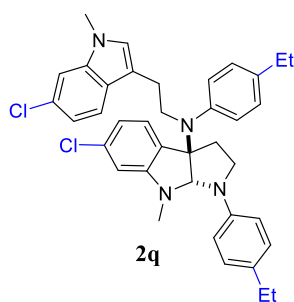

Following the general procedure for 3a-tryptamine-pyrroloindolines. The procedure was performed on **1q** (0.2 mmol), CuBr<sub>2</sub> (0.03 mmol), **L1** (0.024 mmol), PhCl (2.0 mL), ZnI<sub>2</sub> (0.03 mmol), NH<sub>4</sub>H<sub>2</sub>PO<sub>4</sub> (0.02 mmol) to afford **2q**. Light yellow oil, 5 h, 22.6 mg, 36% yield; <sup>1</sup>H NMR (600 MHz, CDCl<sub>3</sub>) δ 7.25 – 7.24 (m, 1 H), 7.14 (d, *J* = 8.4 Hz, 1 H), 7.07 – 6.98 (m, 8 H), 6.68 (s, 1 H), 6.61 (dd, *J* = 7.8, 1.8 Hz, 1 H), 6.56 (d, *J* = 8.6 Hz, 2 H), 6.28 (d, *J* = 1.8 Hz, 1 H), 5.52 (s, 1 H), 3.64 (s, 3 H), 3.27 – 3.19 (m, 2 H), 3.05 – 2.99 (m, 1 H), 2.95 – 2.90 (m, 1 H), 2.66 – 2.59 (m, 6 H), 2.56 (q, *J* = 7.4 Hz, 3 H), 2.36 (dt, *J* = 12.4, 7.8 Hz, 1 H), 2.05 – 1.99 (m, 1 H), 1.22 (dt, *J* = 13.4, 7.6 Hz, 6 H) ppm. <sup>13</sup>C NMR (150 MHz, CDCl<sub>3</sub>) δ 152.8, 145.0, 144.9, 141.6, 137.3, 134.6, 133.2, 129.6, 129.0, 128.4, 127.9, 127.5, 127.3, 126.4, 124.4, 119.8, 119.2, 116.7, 113.5, 113.1, 109.1, 106.7, 86.6, 78.4, 52.1, 47.6 37.2, 34.4, 32.6, 28.3, 27.8, 24.9, 15.9, 15.6 ppm. HRMS (ESI) *m/z*: [M + H]<sup>+</sup> Calcd for C<sub>38</sub>H<sub>41</sub>N<sub>4</sub>Cl<sub>2</sub> 623.2703; Found 623.2697.

**8-Benzyl-N-(2-(1-benzyl-1*H*-indol-3-yl)ethyl)-N,1-diphenyl-2,3,8*a*-tetrahydropyrrolo[2,3-*b*]indol-3*a*(1*H*)-amine (2r)**

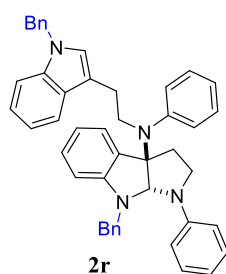

Following the general procedure for 3*a*-tryptamine-pyrroloindolines. The procedure was performed on **1r** (0.2 mmol), CuBr<sub>2</sub> (0.02 mmol), **L4** (0.024 mmol), Mesitylene (2.0 mL), ZnI<sub>2</sub> (0.03 mmol), NH<sub>4</sub>H<sub>2</sub>PO<sub>4</sub> (0.02 mmol) to afford **2r**. Yellow oil, 70 h, 34.1 mg, 52% yield; <sup>1</sup>H NMR (600 MHz, CDCl<sub>3</sub>)

δ 7.27 – 7.22 (m, 5 H), 7.22 – 7.17 (m, 3 H), 7.17 – 7.12 (m, 2 H), 7.12 – 7.08 (m, 2 H), 7.06 (s, 5 H), 7.04 – 6.97 (m, 4 H), 6.91 (d, *J* = 7.6 Hz, 2 H), 6.75 (s, 1 H), 6.69 (t, *J* = 7.6 Hz, 1 H), 6.64 (t, *J* = 7.4 Hz, 1 H), 6.54 (d, *J* = 8.0 Hz, 2 H), 6.23 (d, *J* = 7.8 Hz, 1 H), 5.88 (s, 1 H), 5.20 (s, 2 H), 4.37 (d, *J* = 17.0 Hz, 1 H), 4.11 (d, *J* = 16.8 Hz, 1 H), 3.51 – 3.43 (m, 1 H), 3.37 – 3.28 (m, 1 H), 3.16 (q, *J* = 7.8 Hz, 1 H, 3.06 – 2.99 (m, 1H), 2.78 – 2.69 (m, 1 H), 2.68 – 2.58 (m, 1 H), 2.51 – 2.42 (m, 1 H), 2.26 – 2.18 (m, 1 H) ppm. <sup>13</sup>C NMR (150 MHz, CDCl<sub>3</sub>) δ 151.2, 147.9, 147.4, 138.8, 137.8, 136.6, 130.7, 129.2, 129.0, 129.0, 128.7, 128.6, 128.2, 128.1, 127.5, 126.8, 126.7, 126.5, 125.9, 125.4, 123.9, 121.5, 119.1, 118.8, 117.2, 117.2, 113.4, 113.3, 109.5, 106.5, 84.4, 79.2, 52.5, 50.0, 49.8, 47.5, 38.0, 25.4 ppm. HRMS (ESI) *m/z*: [M + H]<sup>+</sup> Calcd for C<sub>46</sub>H<sub>43</sub>N<sub>4</sub> 651.3482; Found 651.3475

**8-(4-Methoxybenzyl)-N-(2-(1-(4-methoxybenzyl)-1*H*-indol-3-yl)ethyl)-N,1-diphenyl-2,3,8*a*-tetrahydropyrrolo[2,3-*b*]indol-3*a*(1*H*)-amine (2s)**

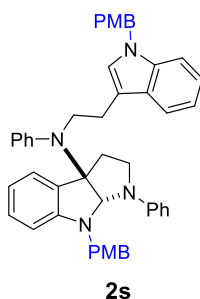

Following the general procedure for 3*a*-tryptamine-pyrroloindolines. The procedure was performed on **1s** (0.2 mmol), CuBr<sub>2</sub> (0.02 mmol), **L4** (0.024 mmol), Mesitylene (2.0 mL), ZnI<sub>2</sub> (0.03 mmol), NH<sub>4</sub>H<sub>2</sub>PO<sub>4</sub> (0.02 mmol) to afford **2s**. Brown oil, 24 h, 42.6 mg, 60% yield; <sup>1</sup>H NMR (600 MHz, CDCl<sub>3</sub>) δ 7.26 (d, *J* = 7.4 Hz, 1 H), 7.24 – 7.17 (m, 4 H),

7.16 – 7.12 (m, 2 H), 7.12 – 7.04 (m, 5 H), 7.02 – 6.94 (m, 3 H), 6.83 (d,  $J = 8.2$  Hz, 2 H), 6.78 (d,  $J = 8.6$  Hz, 2 H), 6.73 (s, 1H), 6.69 (t,  $J = 7.2$  Hz, 1 H), 6.66 (t,  $J = 7.4$  Hz, 1 H), 6.55 (t,  $J = 7.6$  Hz, 4 H), 6.26 (d,  $J = 7.8$  Hz, 1 H), 5.87 (s, 1 H), 5.13 (s, 2 H), 4.34 (d,  $J = 16.6$  Hz, 1 H), 4.04 (d,  $J = 16.6$  Hz, 1 H), 3.73 (s, 3 H), 3.66 (s, 3 H), 3.52 – 3.39 (m, 1 H), 3.33 – 3.22 (m, 1 H), 3.15 (q,  $J = 8.1$  Hz, 1 H), 3.04 – 2.95 (m, 1 H), 2.77 – 2.66 (m, 1 H), 2.65 – 2.54 (m, 1 H), 2.51 – 2.41 (m, 1 H), 2.24 – 2.14 (m, 1 H) ppm.  $^{13}\text{C}$  NMR (150 MHz,  $\text{CDCl}_3$ )  $\delta$  158.9, 158.2, 151.2, 147.9, 147.4, 136.5, 130.8, 130.7, 129.7, 129.2, 129.0, 129.0, 128.6, 128.1, 127.8, 125.8, 125.3, 123.8, 121.4, 119.1, 118.8, 117.2, 117.1, 114.0, 113.6, 113.4, 113.2, 109.5, 106.5, 84.2, 79.2, 55.2, 55.1, 52.6, 49.3, 49.2, 47.4, 38.0, 25.4 ppm. HRMS (ESI)  $m/z$ :  $[\text{M} + \text{H}]^+$  Calcd for  $\text{C}_{48}\text{H}_{47}\text{O}_2\text{N}_4$  711.3694; Found 711.3672.

**8-Allyl-N-(2-(1-allyl-1*H*-indol-3-yl)ethyl)-N,1-diphenyl-2,3,8,8a-tetrahydropyrrolo[2,3-*b*]indol-3a(1*H*)-amine (2t)**

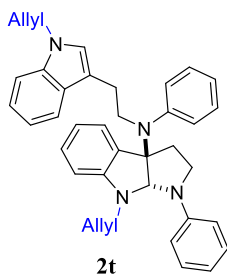

Following the general procedure for 3a-tryptamine-pyrroloindolines. The procedure was performed on **1t** (0.2 mmol),  $\text{CuBr}_2$  (0.02 mmol), **L4** (0.024 mmol), Mesitylene (2.0 mL),  $\text{ZnI}_2$  (0.03 mmol),  $\text{NH}_4\text{H}_2\text{PO}_4$  (0.02 mmol) to afford **2t**. Light yellow oil, 75 h, 18.5 mg, 33% yield;  $^1\text{H}$

NMR (600 MHz,  $\text{CDCl}_3$ )  $\delta$  7.28 – 7.09 (m, 12 H), 7.01 (t,  $J = 7.6$  Hz, 1 H), 6.78 – 6.61 (m, 5 H), 6.34 (d,  $J = 7.8$  Hz, 1 H), 5.97 – 5.90 (m, 1 H), 5.84 (s, 1 H), 5.53 – 5.45 (m, 1 H), 5.17 – 5.13 (m, 1 H), 5.08 – 4.94 (m, 3 H), 4.61 (d,  $J = 5.4$  Hz, 2 H), 3.80 – 3.74 (m, 1 H), 3.55 (dd,  $J = 17.2, 6.4$  Hz, 1 H), 3.46 – 3.39 (m, 1 H), 3.37 – 3.30 (m, 1 H), 3.14 – 3.08 (m, 1 H), 2.94 – 2.88 (m, 1 H), 2.77 – 2.70 (m, 1 H), 2.66 – 2.60 (m, 1 H), 2.48 (dt,  $J = 12.6, 7.6$  Hz, 1H), 2.23 – 2.16 (m, 1 H) ppm.  $^{13}\text{C}$  NMR (150 MHz,  $\text{CDCl}_3$ )  $\delta$  150.4, 147.9, 147.4, 136.3, 134.1, 133.7, 131.0, 129.1, 129.0, 128.9, 128.5, 128.1, 125.5, 125.3, 123.7, 121.4, 119.0, 118.7, 117.3, 117.1, 117.1, 116.2, 113.5, 113.1, 109.4, 106.7, 84.5, 79.0, 52.5, 49.1, 48.6, 47.4, 37.8, 25.3 ppm.



**HRMS (ESI)  $m/z$ :**  $[M + H]^+$  Calcd for  $C_{38}H_{39}N_4$  551.3169; Found 551.3166.

## 6 Scale-up experiments

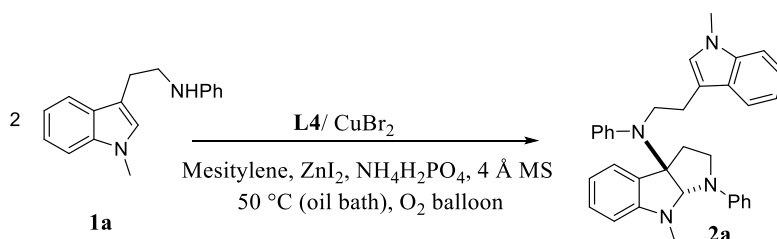

**Procedure:** A mixture of **1a** (250.3 mg, 1.0 mmol), CuBr<sub>2</sub> (22.3 mg, 0.1 mmol), **L4** (58.4 mg, 0.12 mmol), ZnI<sub>2</sub> (47.9 mg, 0.15 mmol), NH<sub>4</sub>H<sub>2</sub>PO<sub>4</sub> (11.5 mg, 0.1 mmol) and 4ÅMS (1.0 g) in Mesitylene (10 mL) was stirred at 50 °C under O<sub>2</sub> balloon. After the reaction was completed (monitored by TLC), the reaction was filtered through a glass funnel with thin layer (30 mm) of silica gel (100-200 mesh) and eluted with DCM/Ethyl Acetate. The filtrate was concentrated under reduced pressure, purified by flash chromatography (Petroleum ether/Ethyl acetate = 60/1) to afford the product **2a** (14 h, 161.9 mg, 65%).

## 7 References

- [1] W.-D. Li, J. Chen, D.-Y. Zhu and J.-B. Xia, *Chin. J. Chem*, 2020, **39**, 614-620.
- [2] L. Serusi, M. Bonnans, A. Luridiana, F. Secci, P. Caboni, T. Boddaert, D.-J. Aitken and A. Frongia, *Adv. Synth. Catal*, 2019, **361**, 1908-1912.

# 8 <sup>1</sup>H NMR, <sup>13</sup>C NMR and <sup>19</sup>F NMR Spectra of compounds

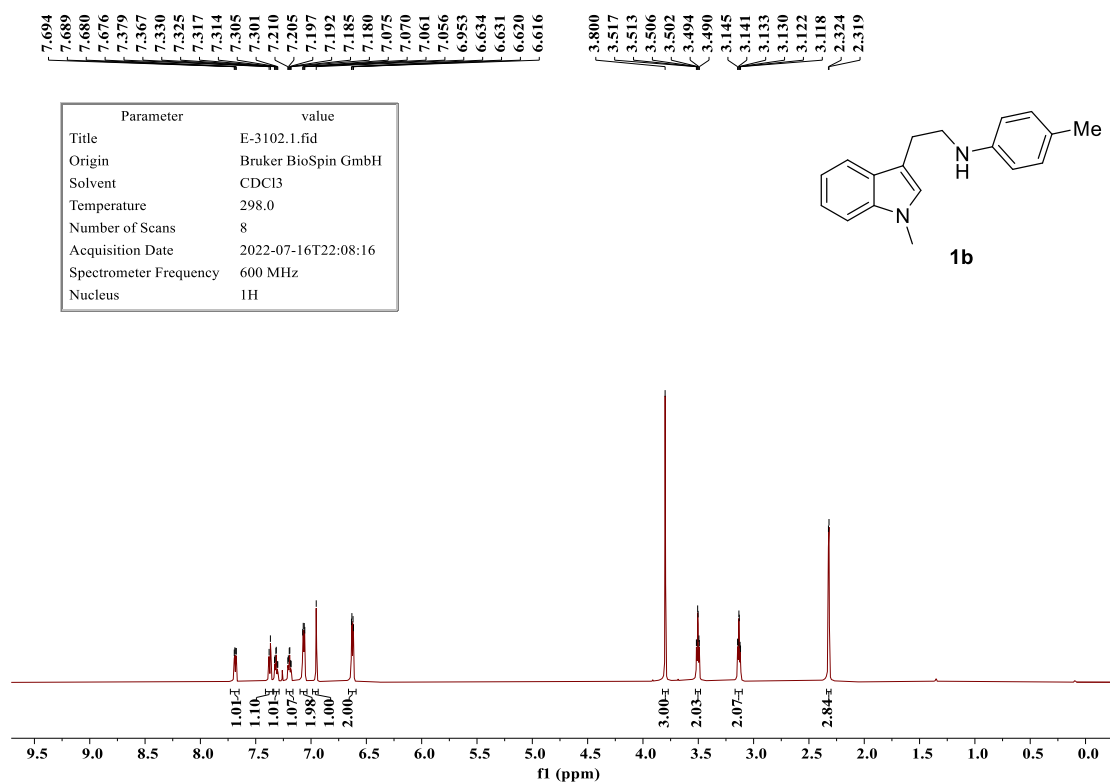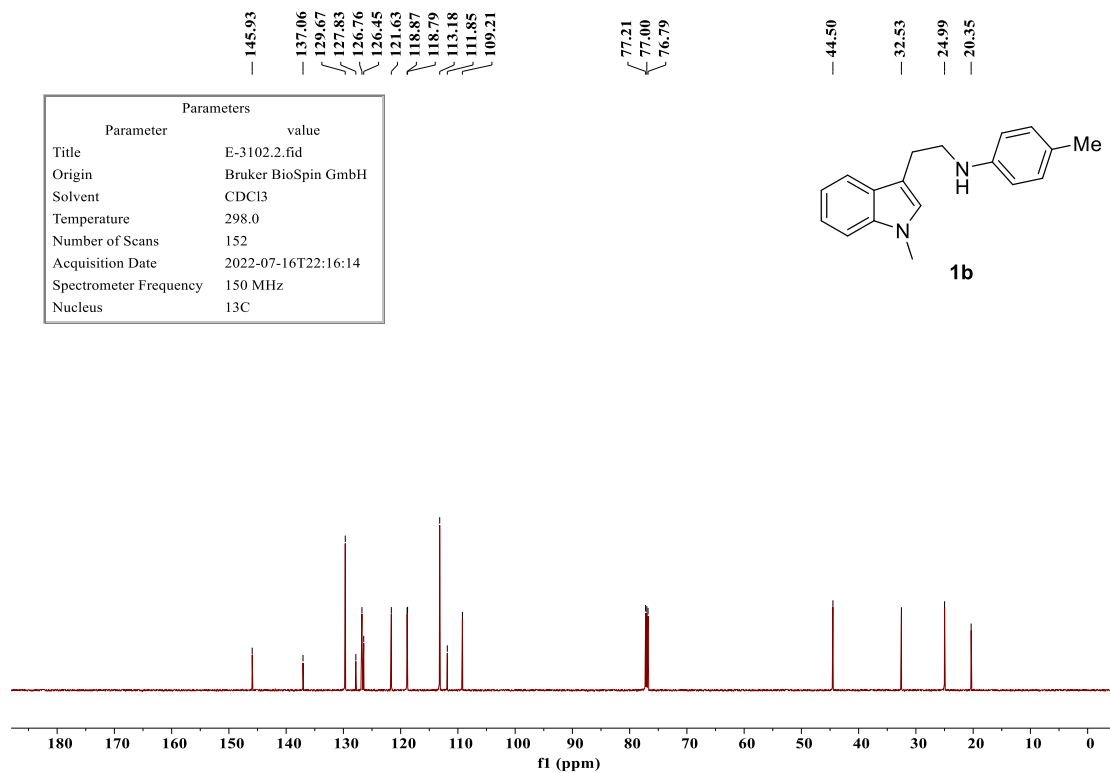

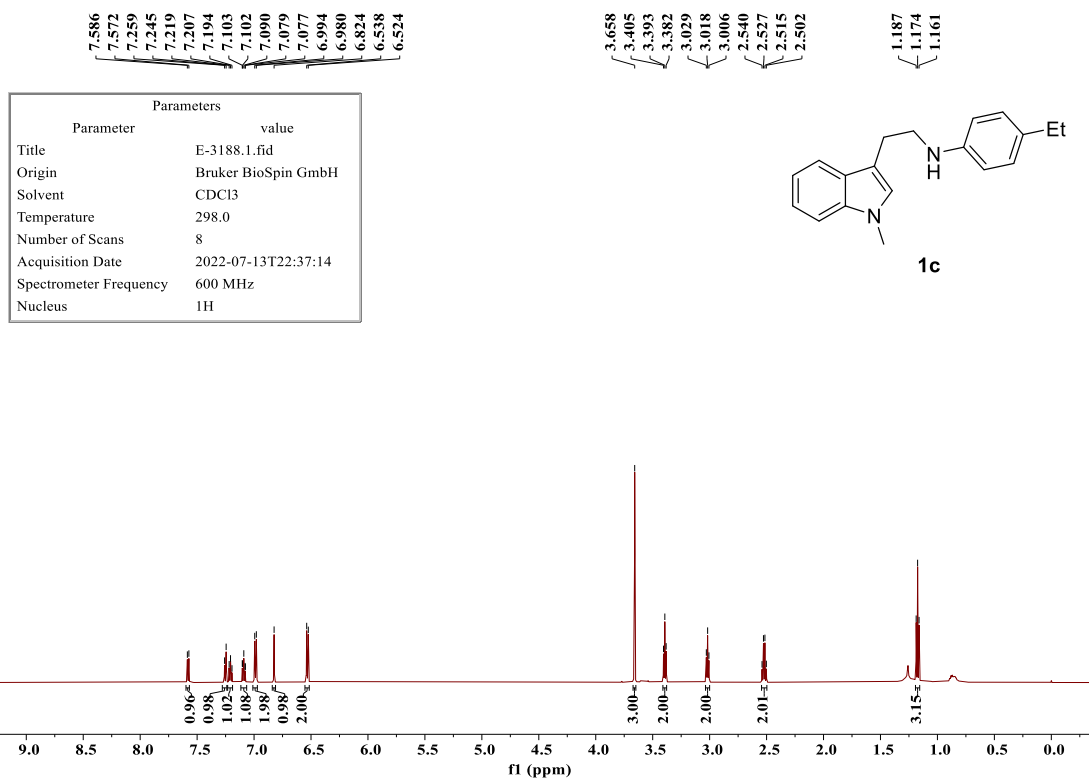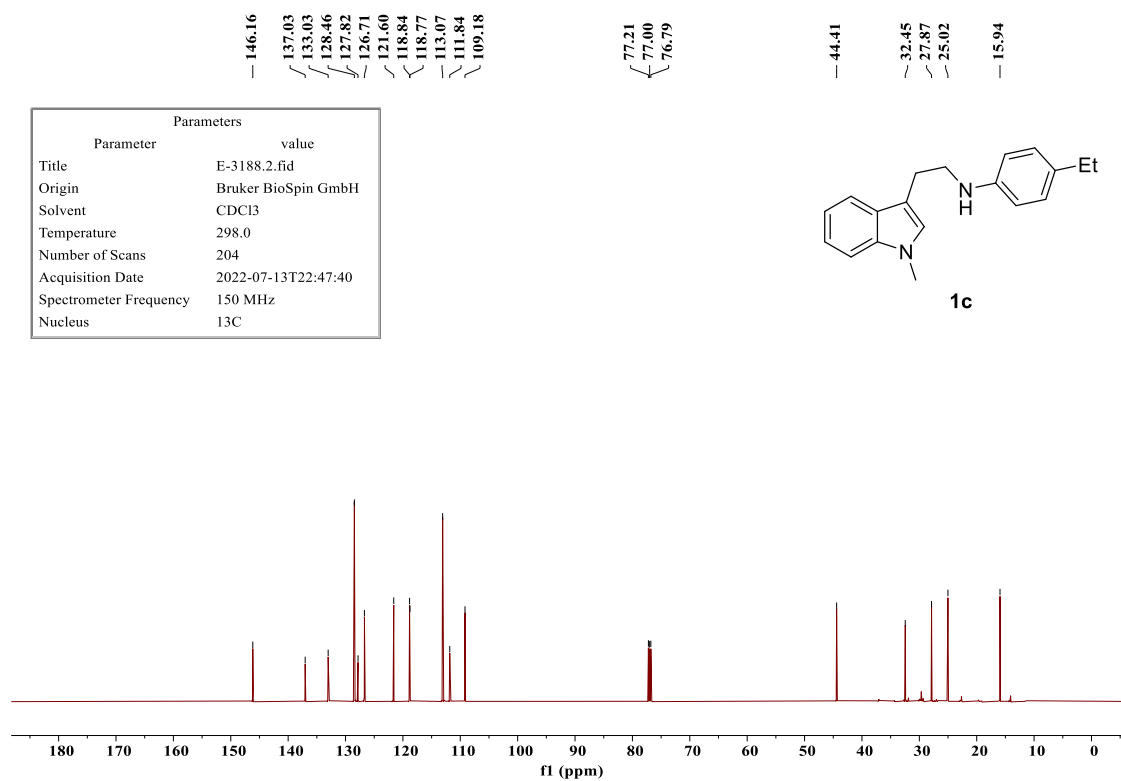

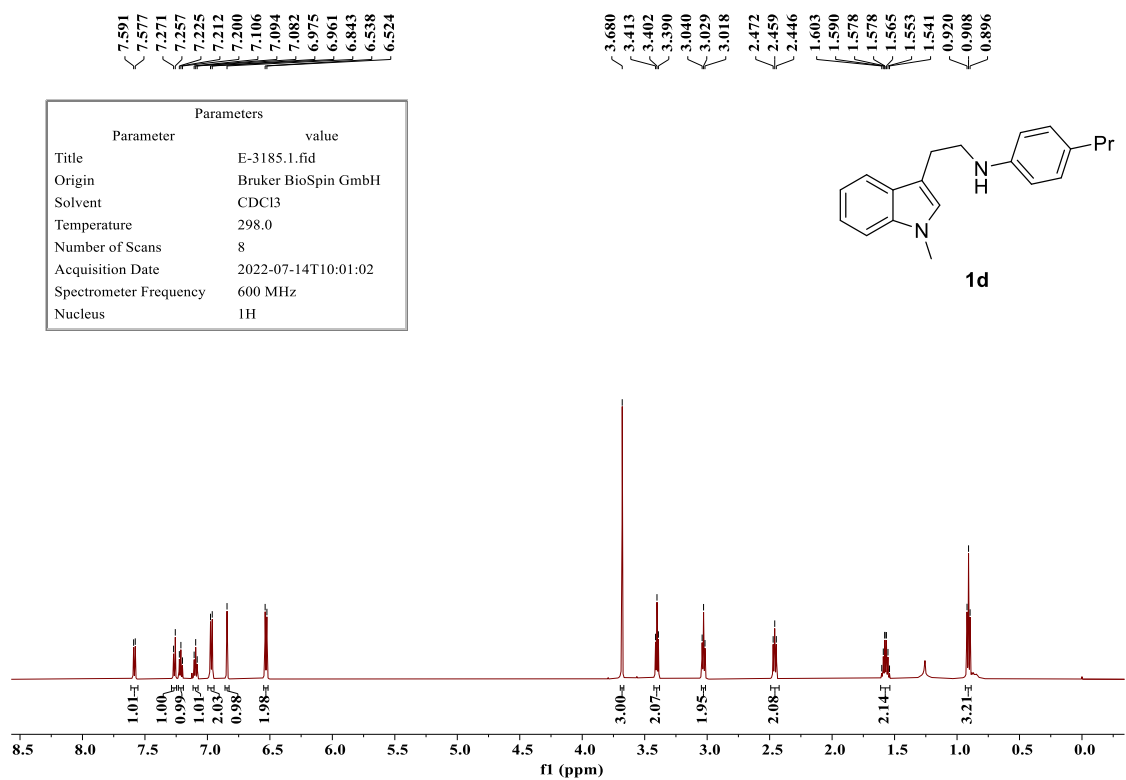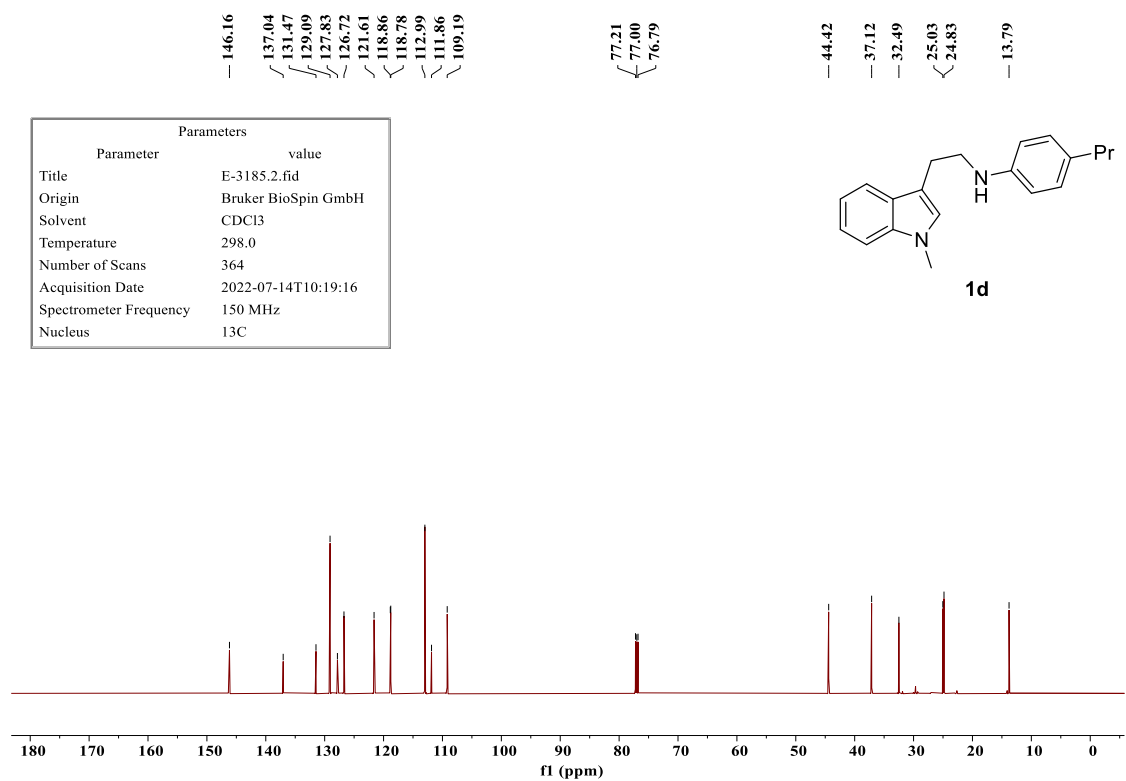

7.590  
7.577  
7.311  
7.297  
7.252  
7.240  
7.127  
7.115  
7.015  
7.001  
6.884  
6.525

3.741  
3.427  
3.415  
3.404  
3.071  
3.060  
3.049

| Parameter              | value               |
|------------------------|---------------------|
| Title                  | Ra-3184-1.1.fid     |
| Origin                 | Bruker BioSpin GmbH |
| Solvent                | CDCl3               |
| Temperature            | 298.0               |
| Number of Scans        | 4                   |
| Acquisition Date       | 2022-11-19T11:06:37 |
| Spectrometer Frequency | 600 MHz             |
| Nucleus                | 1H                  |

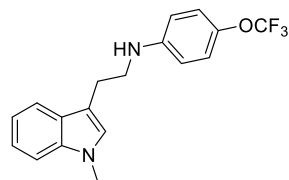

**1f**

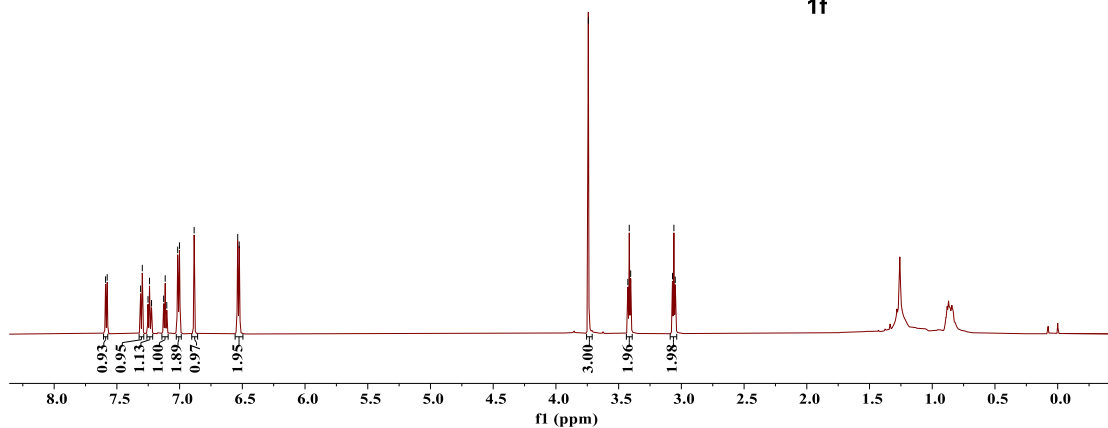

146.95  
140.33  
137.13  
127.77  
126.83  
123.25  
122.35  
121.78  
121.55  
119.86  
118.93  
118.78  
118.17  
113.11  
111.48  
109.33

77.21  
77.00  
76.79

44.31

32.60

24.87

| Parameter              | value               |
|------------------------|---------------------|
| Title                  | Ra-3184-1.2.fid     |
| Origin                 | Bruker BioSpin GmbH |
| Solvent                | CDCl3               |
| Temperature            | 298.0               |
| Number of Scans        | 512                 |
| Acquisition Date       | 2022-11-19T11:31:45 |
| Spectrometer Frequency | 150 MHz             |
| Nucleus                | 13C                 |

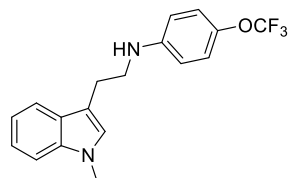

**1f**

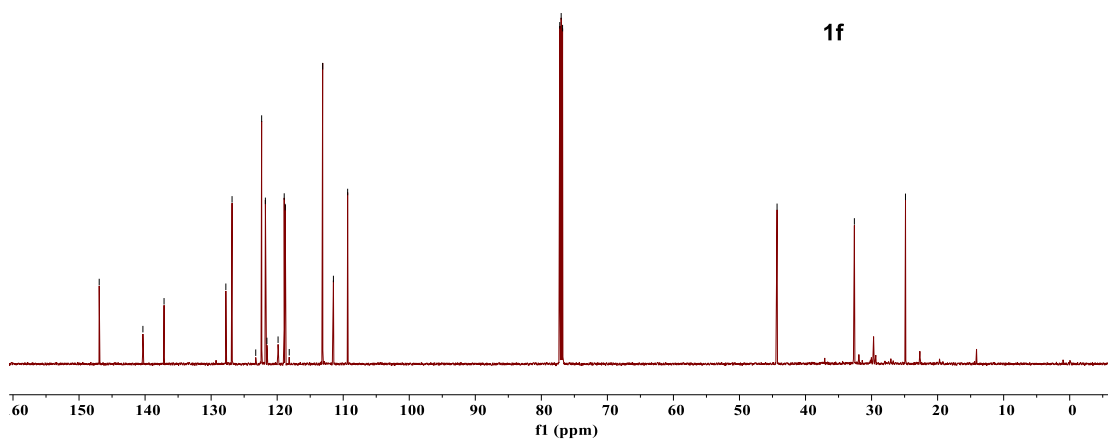

| Parameter              | value               |
|------------------------|---------------------|
| Title                  | Ra-3184-1.3.fid     |
| Origin                 | Bruker BioSpin GmbH |
| Solvent                | CDCl3               |
| Temperature            | 298.1               |
| Number of Scans        | 16                  |
| Acquisition Date       | 2022-11-19T11:33:25 |
| Spectrometer Frequency | 564.63 MHz          |
| Nucleus                | 19F                 |

--58.433

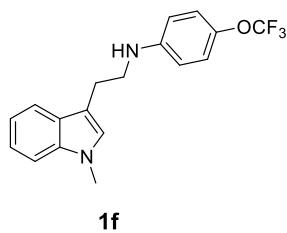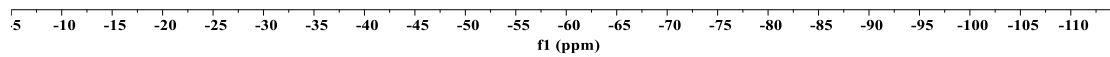



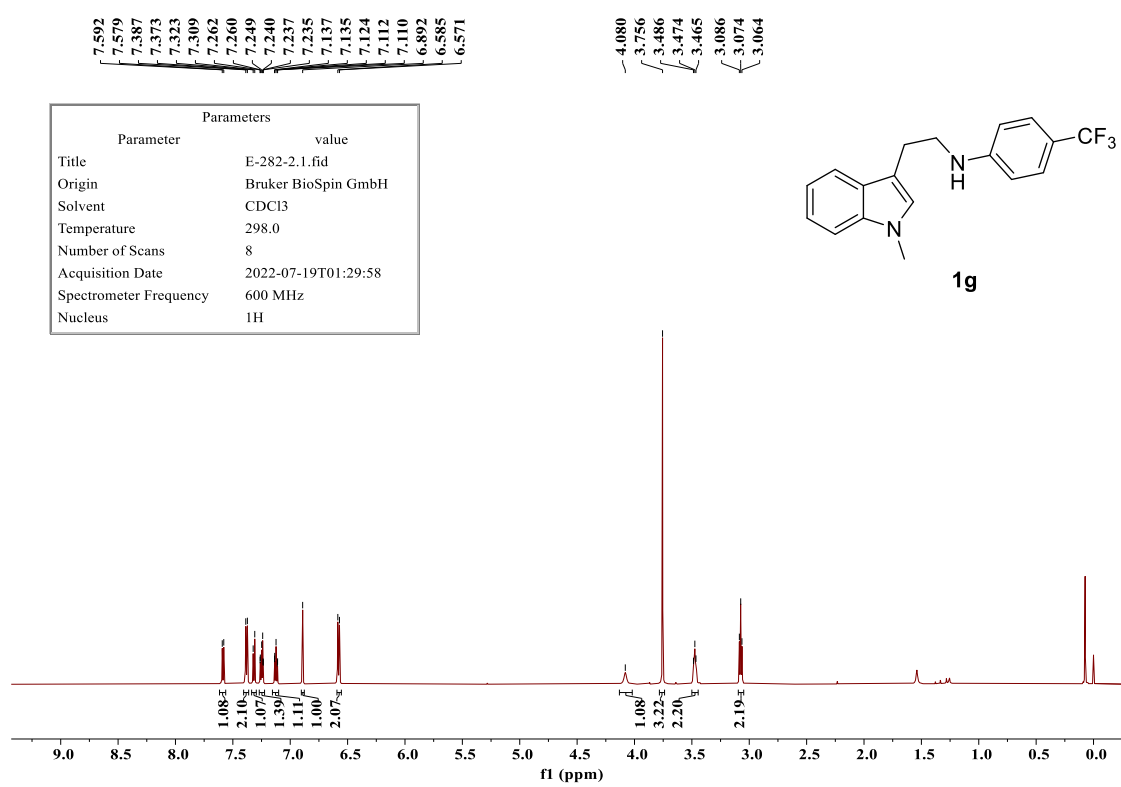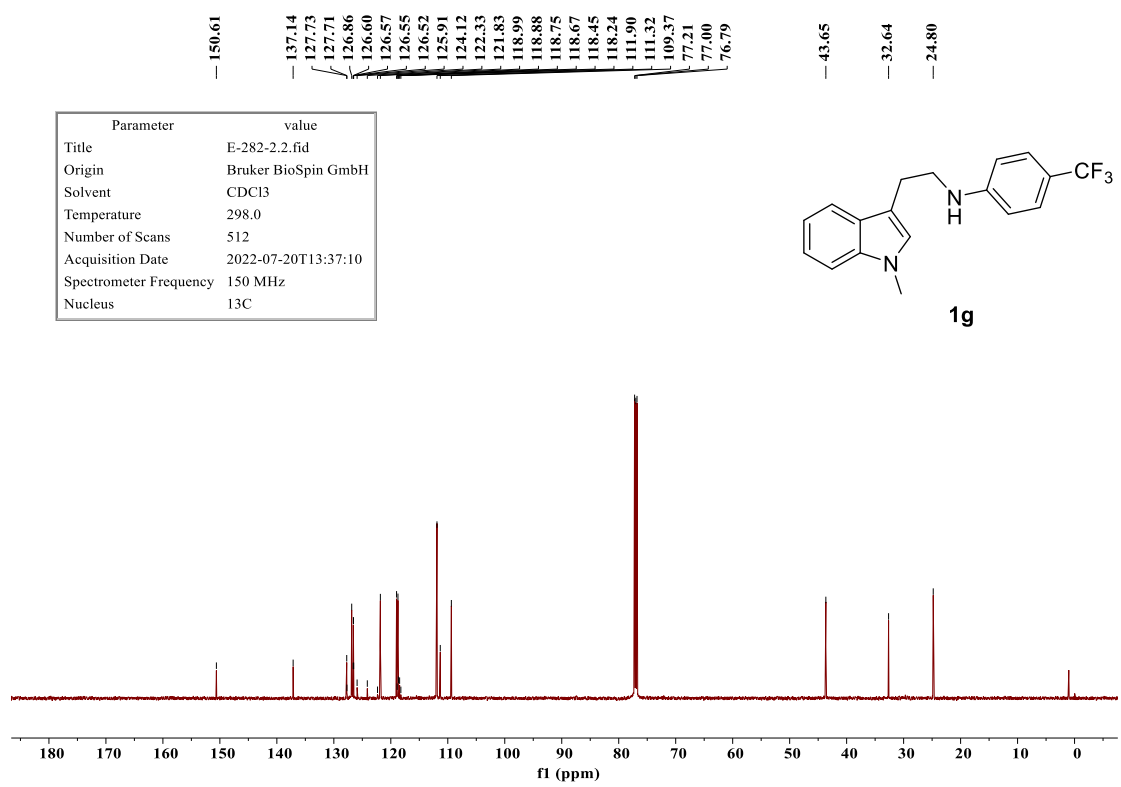

| Parameters             |                     |
|------------------------|---------------------|
| Parameter              | value               |
| Title                  | E-282-2.3.fid       |
| Origin                 | Bruker BioSpin GmbH |
| Solvent                | CDCl3               |
| Temperature            | 298.0               |
| Number of Scans        | 16                  |
| Acquisition Date       | 2022-07-20T13:38:38 |
| Spectrometer Frequency | 565 MHz             |
| Nucleus                | 19F                 |

— -60.895

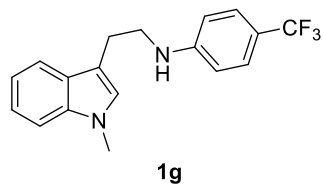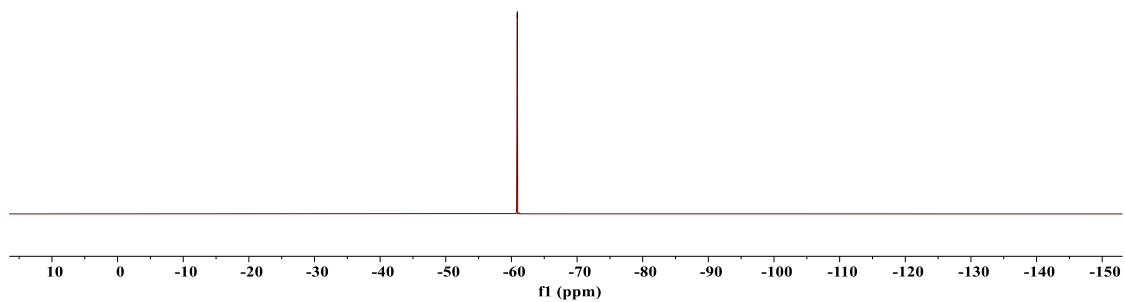

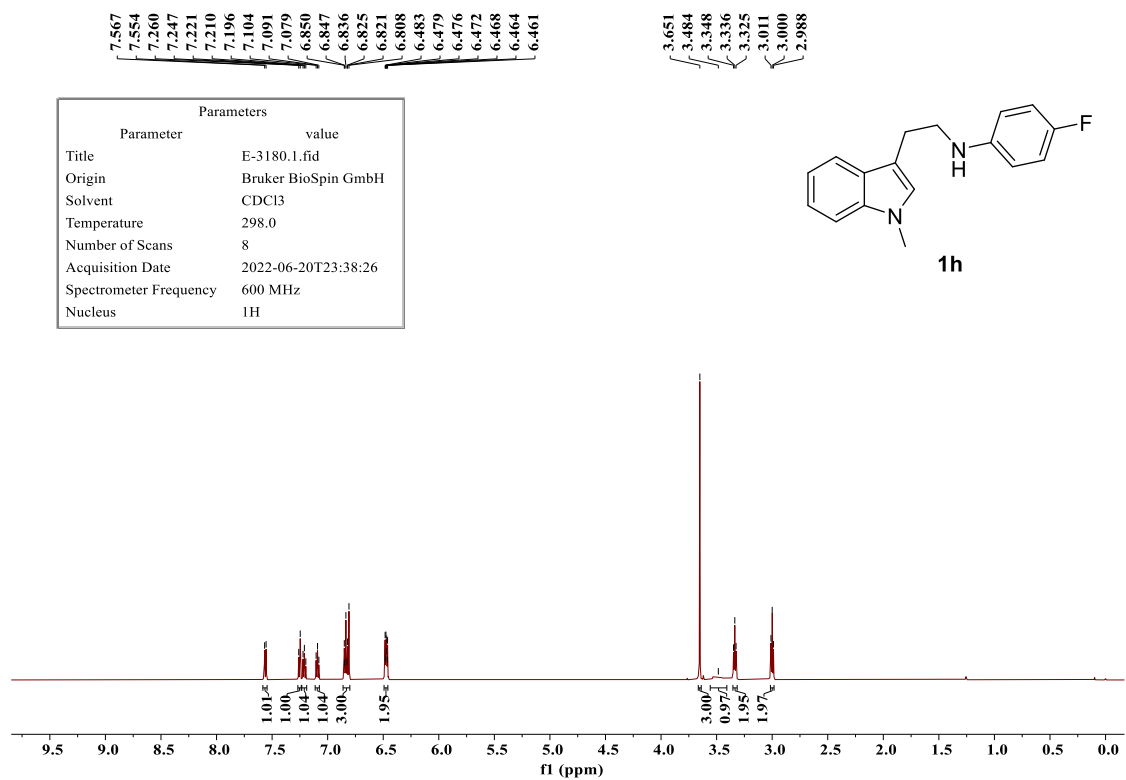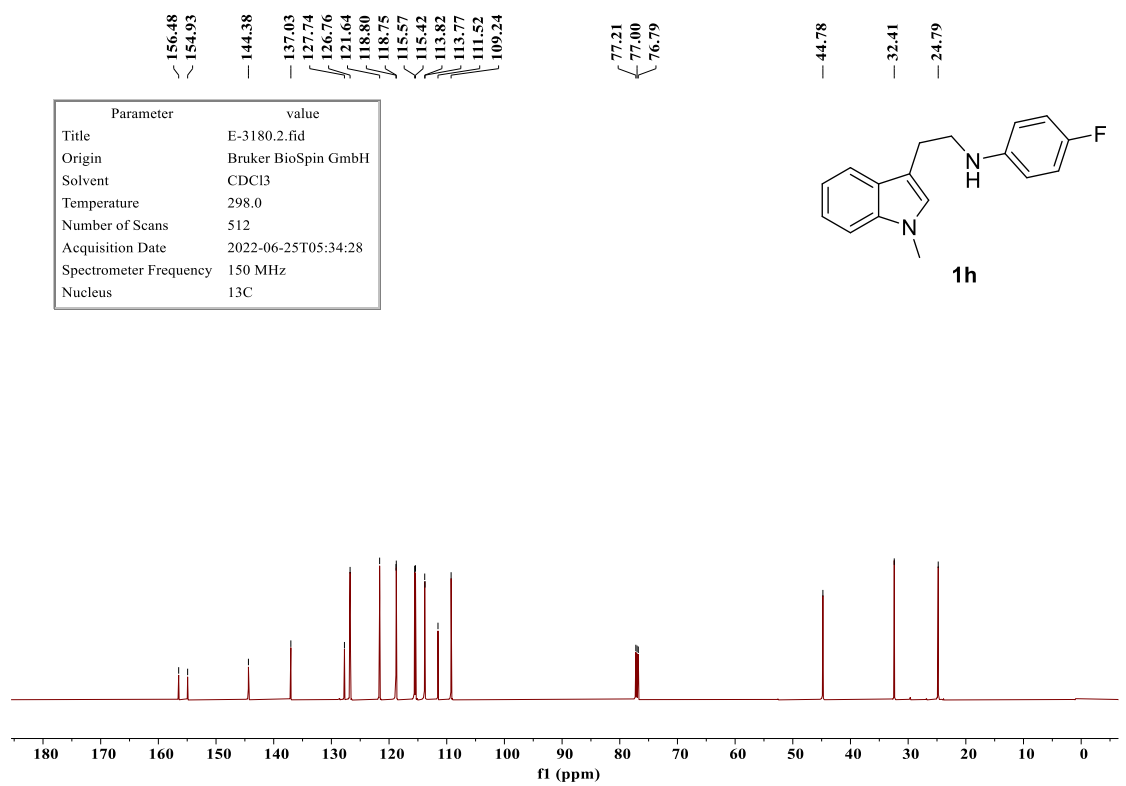

| Parameters             |                     |
|------------------------|---------------------|
| Parameter              | value               |
| Title                  | E-3180.3.fid        |
| Origin                 | Bruker BioSpin GmbH |
| Solvent                | CDCl3               |
| Temperature            | 298.1               |
| Number of Scans        | 16                  |
| Acquisition Date       | 2022-06-25T05:35:53 |
| Spectrometer Frequency | 565 MHz             |
| Nucleus                | 19F                 |

-127.813

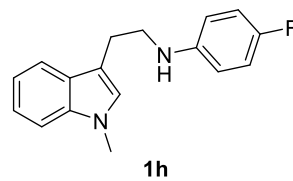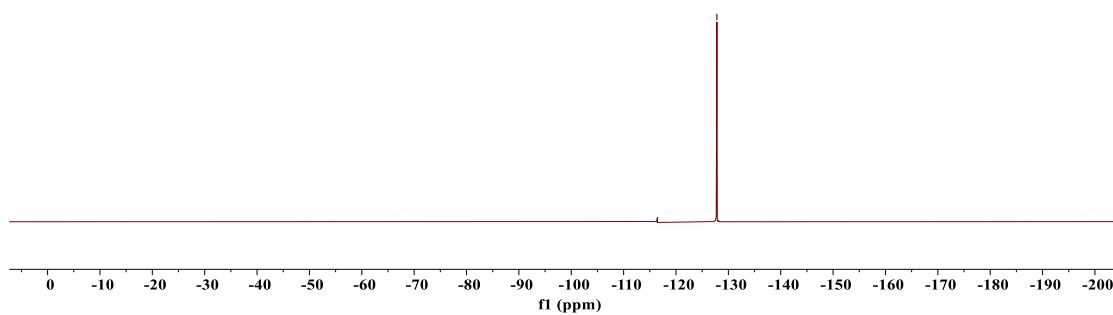

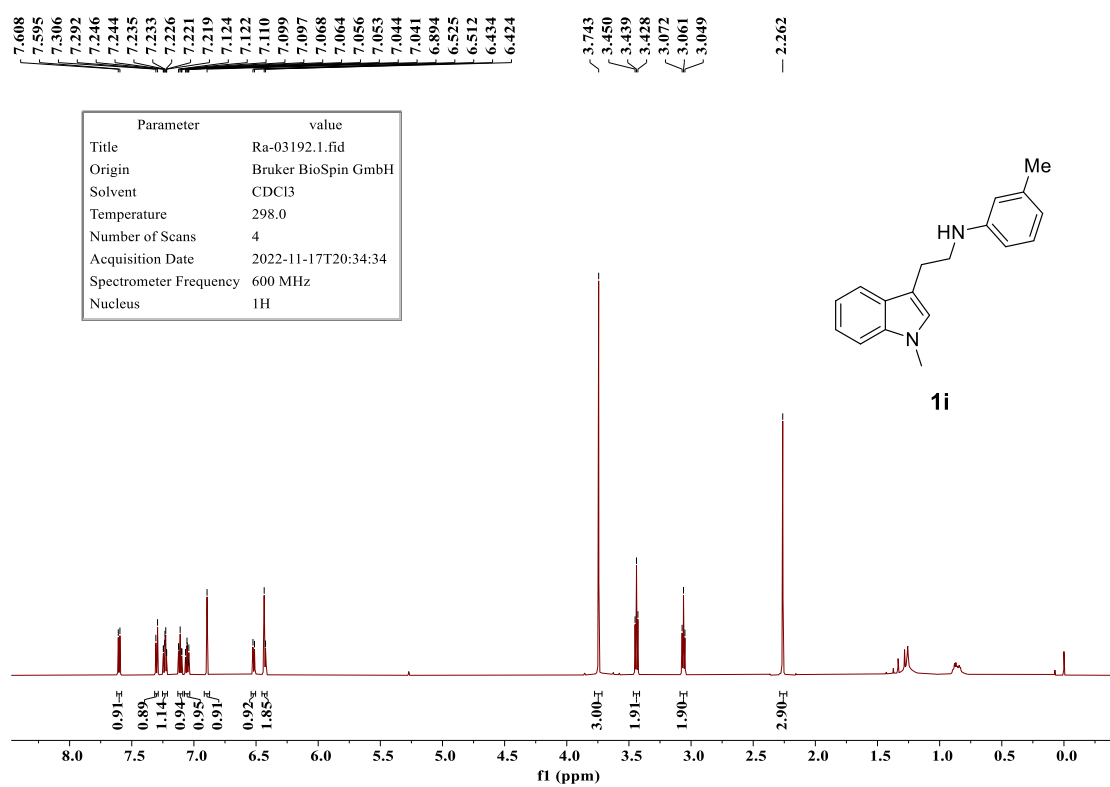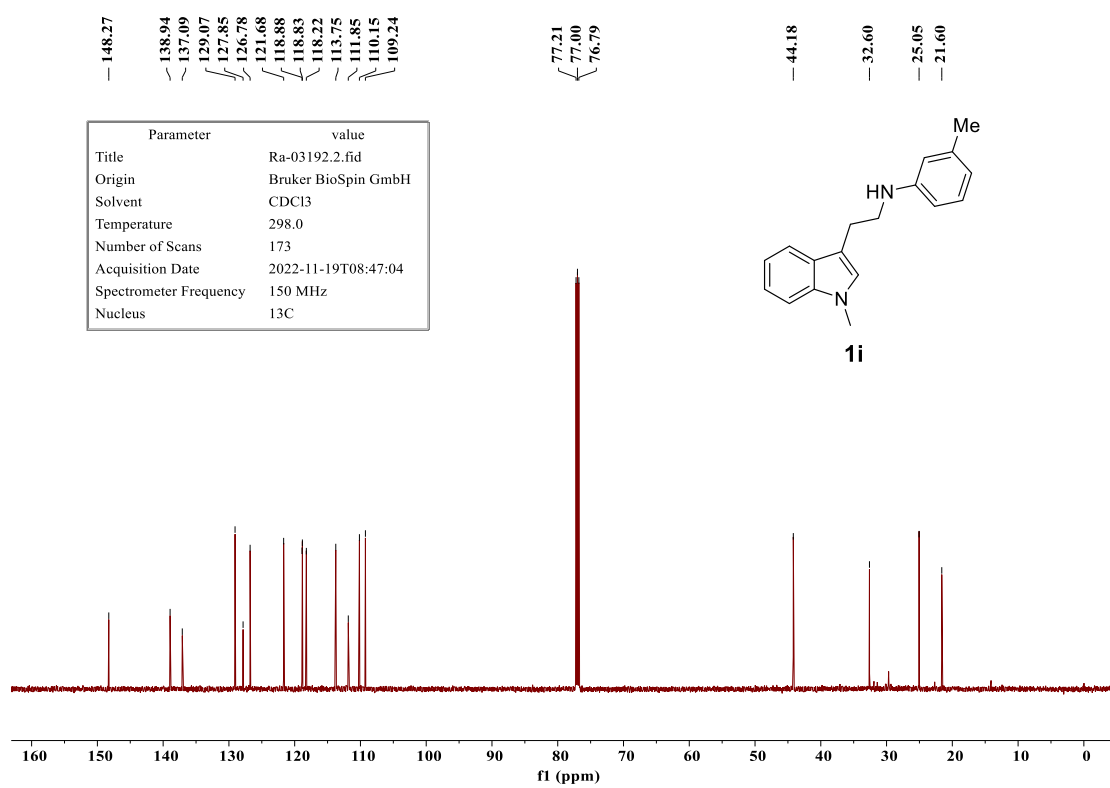

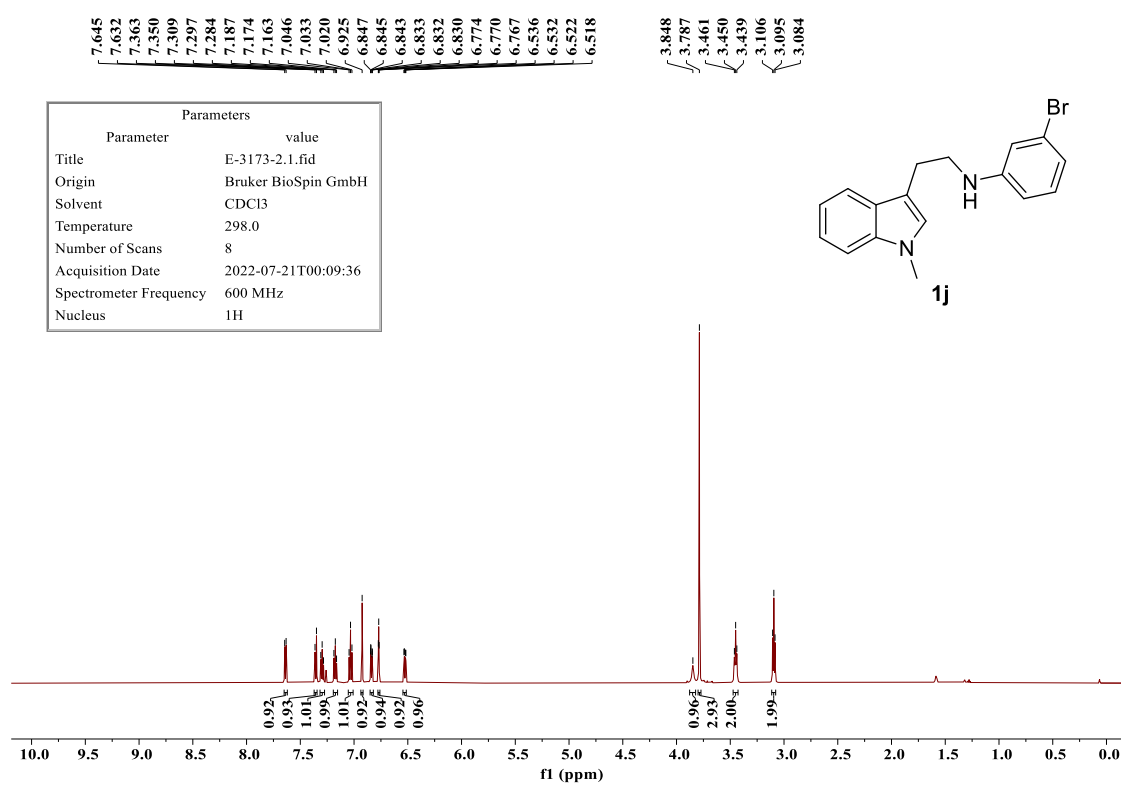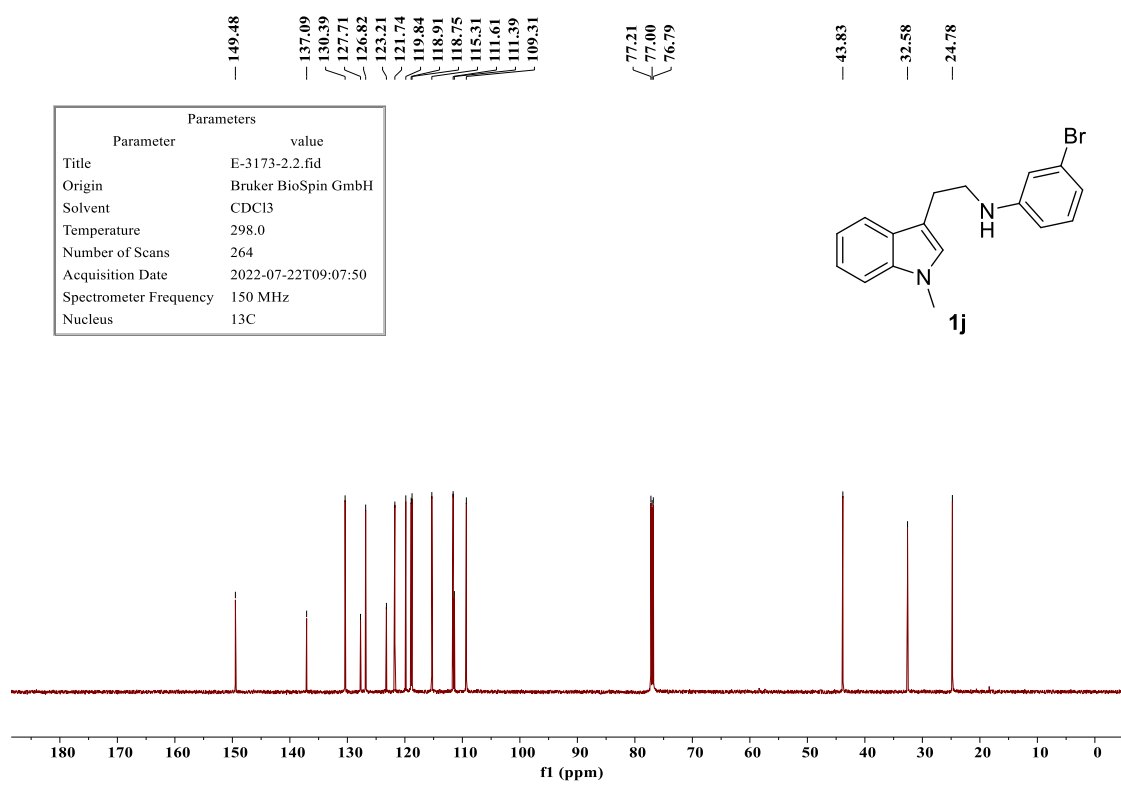

| Parameters             |                     |
|------------------------|---------------------|
| Parameter              | value               |
| Title                  | E-3135-3.1.fid      |
| Origin                 | Bruker BioSpin GmbH |
| Solvent                | CDCl3               |
| Temperature            | 298.0               |
| Number of Scans        | 8                   |
| Acquisition Date       | 2022-08-25T02:39:12 |
| Spectrometer Frequency | 600 MHz             |
| Nucleus                | 1H                  |

7.683  
7.284  
7.269  
7.177  
7.165  
7.152  
7.130  
7.116  
6.855  
6.706  
6.694  
6.683  
6.599  
6.586

3.680  
3.405  
3.394  
3.383  
2.985  
2.973  
2.962

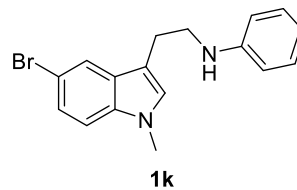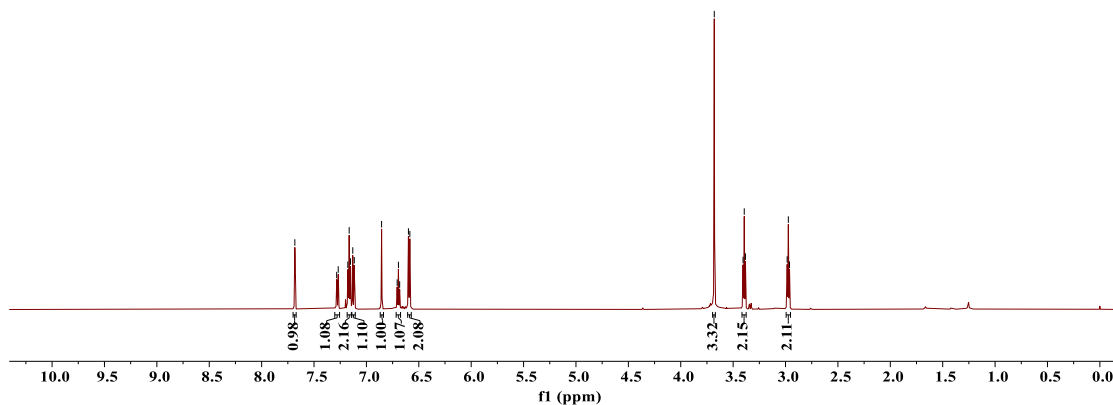

| Parameters             |                     |
|------------------------|---------------------|
| Parameter              | value               |
| Title                  | E-3135-3.2.fid      |
| Origin                 | Bruker BioSpin GmbH |
| Solvent                | CDCl3               |
| Temperature            | 298.0               |
| Number of Scans        | 512                 |
| Acquisition Date       | 2022-08-25T17:59:06 |
| Spectrometer Frequency | 150 MHz             |
| Nucleus                | 13C                 |

148.02  
135.69  
129.48  
129.21  
127.94  
124.42  
121.39  
117.34  
112.94  
112.25  
111.52  
110.75

77.21  
77.00  
76.79

43.99  
32.72  
24.77

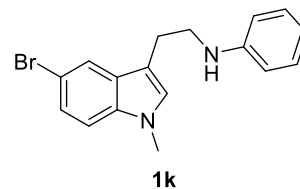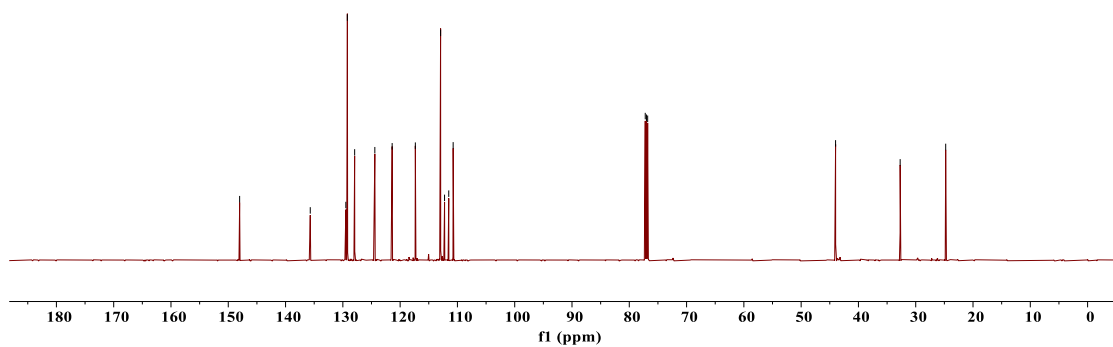

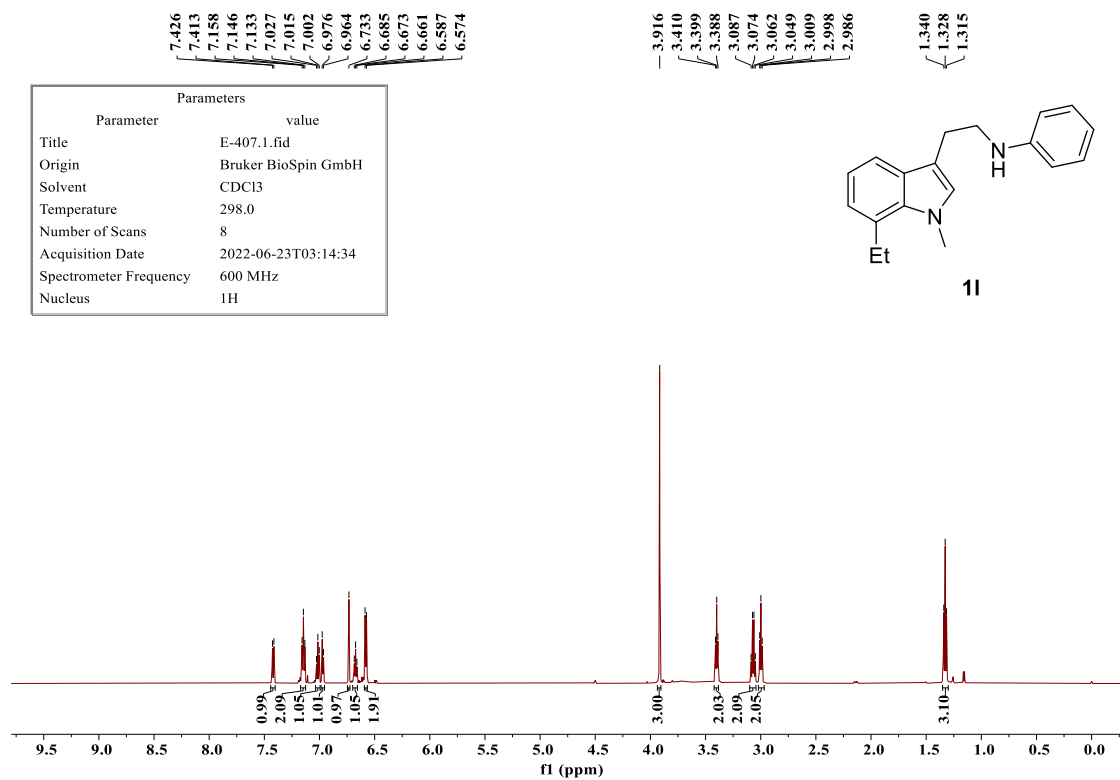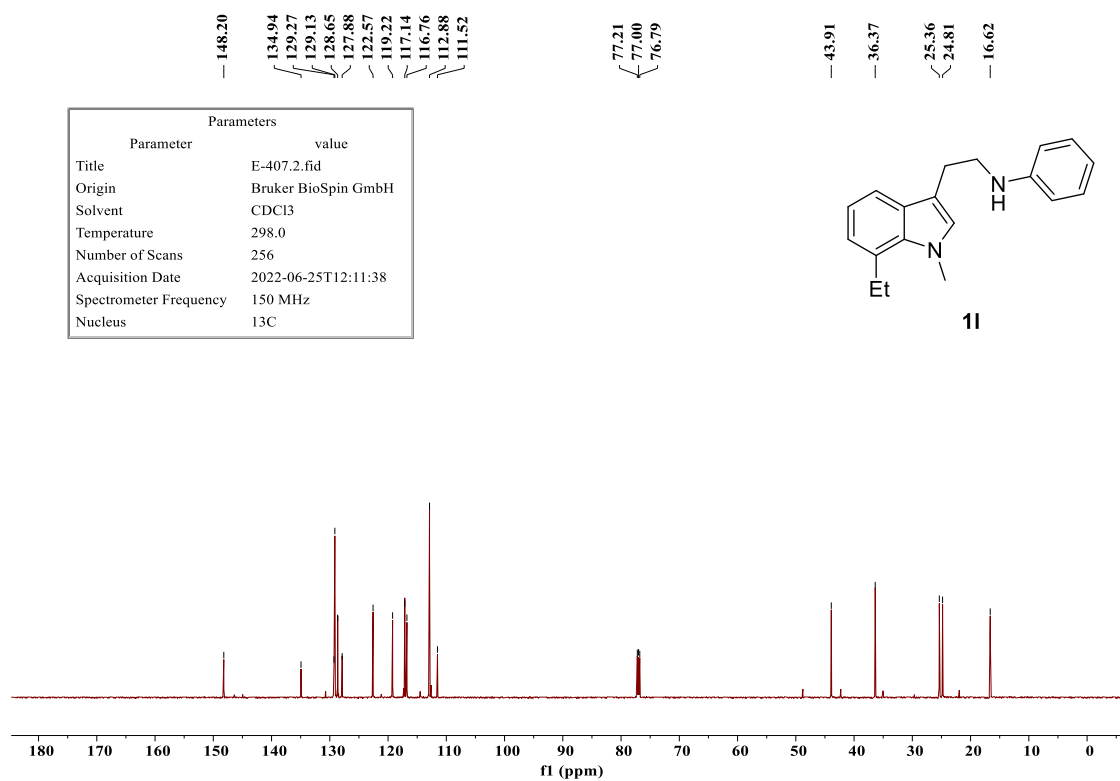



| Parameters             |                     |
|------------------------|---------------------|
| Parameter              | value               |
| Title                  | E-448.1.fid         |
| Origin                 | Bruker BioSpin GmbH |
| Solvent                | CDCl3               |
| Temperature            | 298.0               |
| Number of Scans        | 8                   |
| Acquisition Date       | 2022-06-22T00:25:08 |
| Spectrometer Frequency | 600 MHz             |
| Nucleus                | 1H                  |

7.218  
7.214  
7.202  
7.198  
7.174  
7.167  
7.159  
7.152  
6.982  
6.969  
6.954  
6.950  
6.939  
6.935  
6.895  
6.537  
6.523

3.692  
3.391  
3.380  
3.368  
2.983  
2.971  
2.960  
2.227

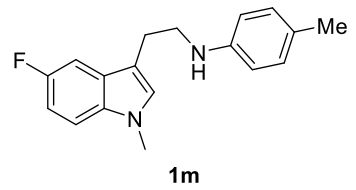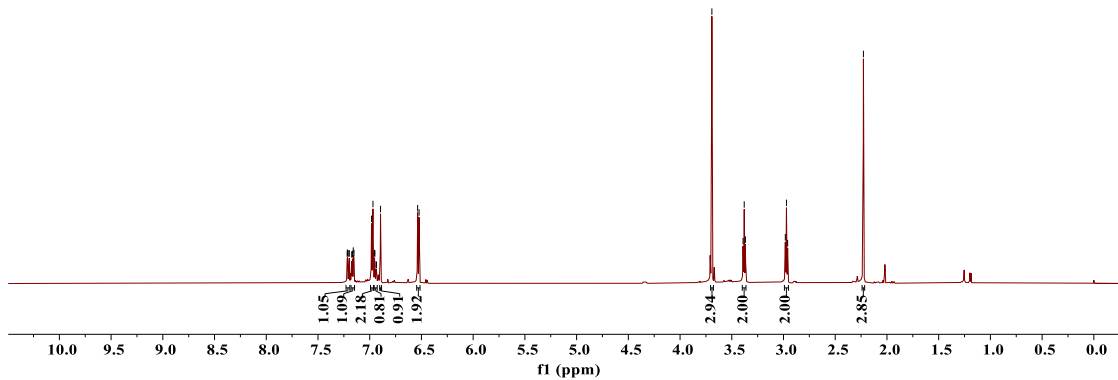

| Parameter              | value               |
|------------------------|---------------------|
| Title                  | E-448.2.fid         |
| Origin                 | Bruker BioSpin GmbH |
| Solvent                | CDCl3               |
| Temperature            | 298.0               |
| Number of Scans        | 800                 |
| Acquisition Date       | 2022-06-24T00:06:21 |
| Spectrometer Frequency | 150 MHz             |
| Nucleus                | 13C                 |

158.34  
156.79  
145.83  
133.70  
129.70  
128.40  
128.04  
127.98  
126.54  
113.16  
111.82  
111.79  
110.03  
109.90  
109.85  
109.83  
103.77  
103.61

77.21  
77.00  
76.79

44.35  
32.78  
24.92  
20.33

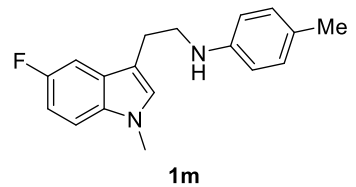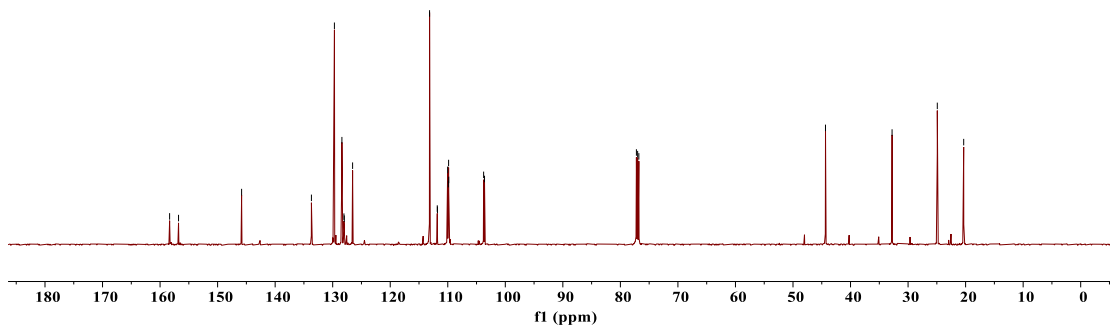

| Parameters             |                     |
|------------------------|---------------------|
| Parameter              | value               |
| Title                  | E-448.3.fid         |
| Origin                 | Bruker BioSpin GmbH |
| Solvent                | CDCl3               |
| Temperature            | 298.0               |
| Number of Scans        | 16                  |
| Acquisition Date       | 2022-06-24T00:07:49 |
| Spectrometer Frequency | 565 MHz             |
| Nucleus                | 19F                 |

---125.362

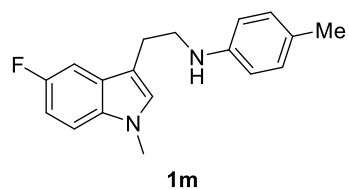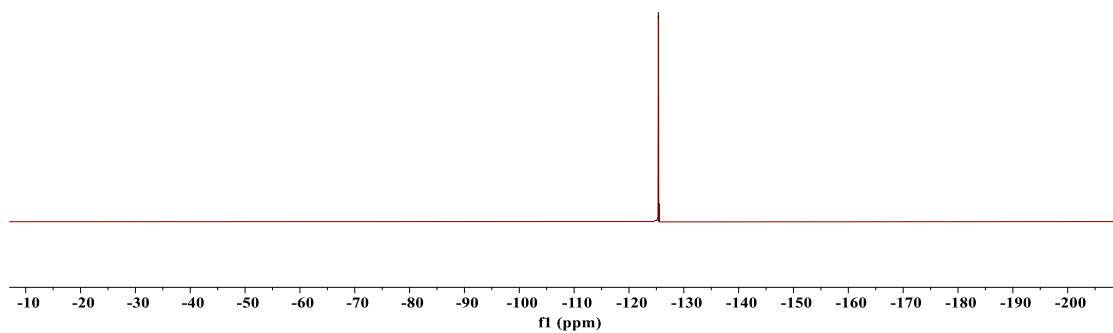

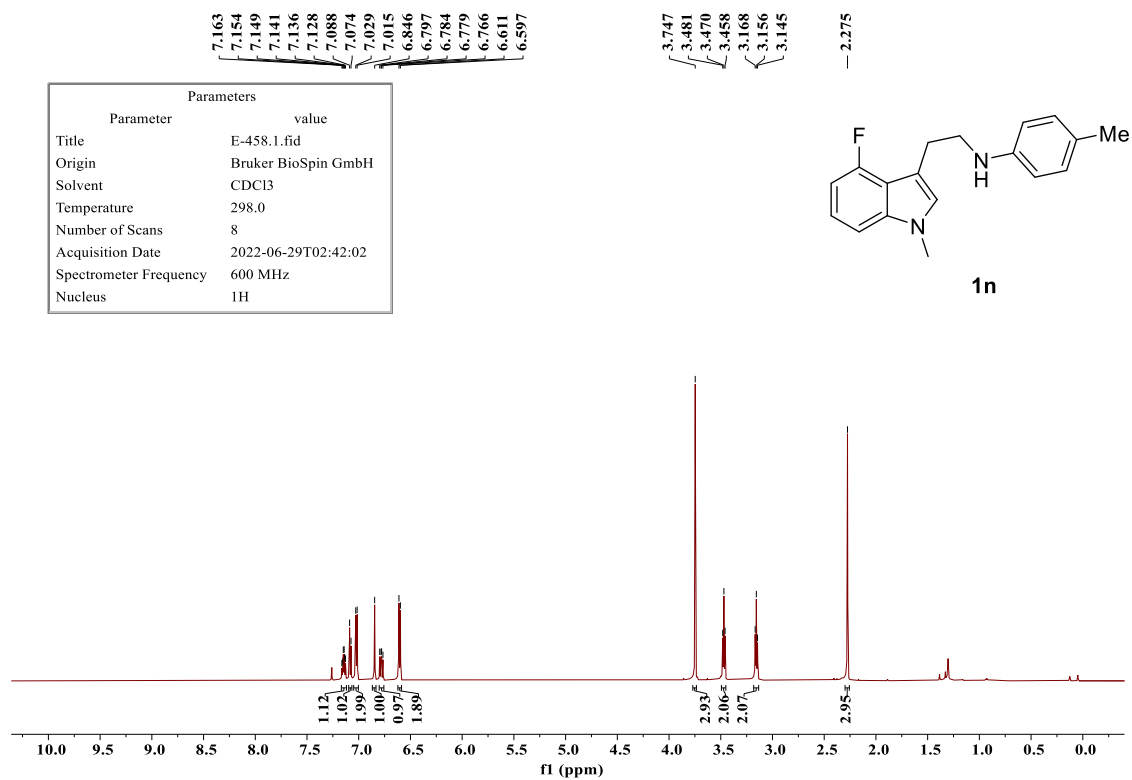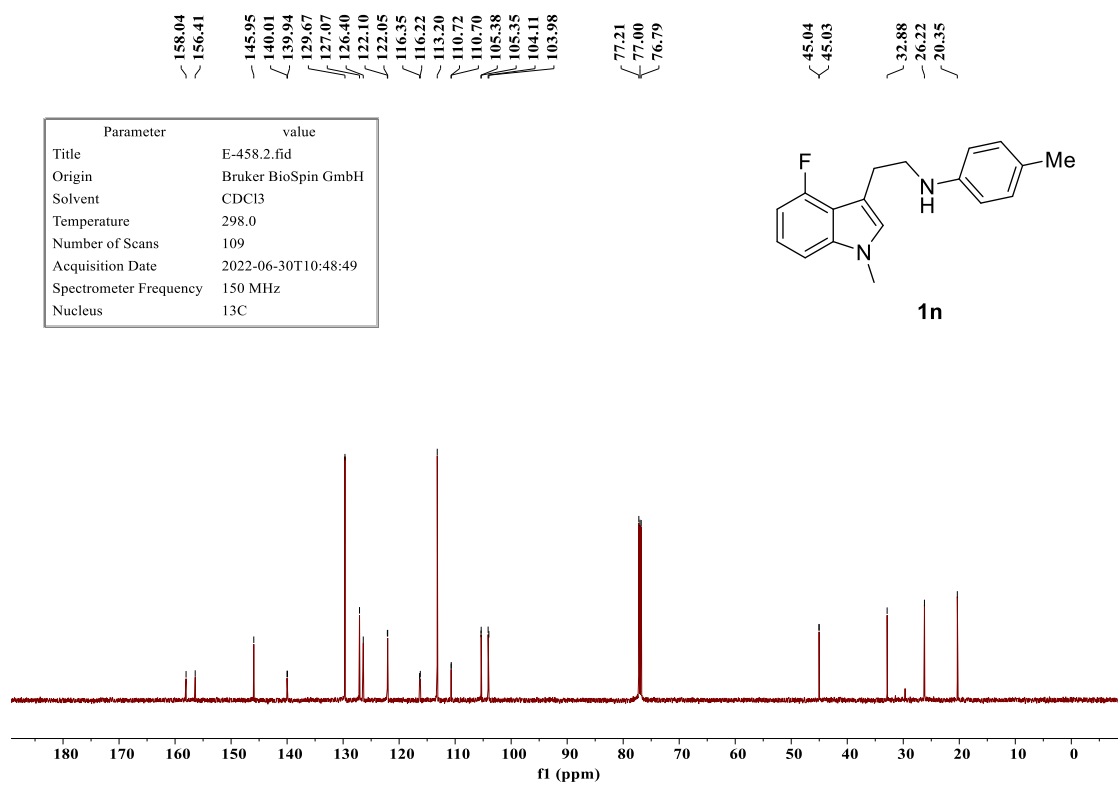

| Parameters             |                     |
|------------------------|---------------------|
| Parameter              | value               |
| Title                  | E-458.3.fid         |
| Origin                 | Bruker BioSpin GmbH |
| Solvent                | CDCl3               |
| Temperature            | 298.0               |
| Number of Scans        | 16                  |
| Acquisition Date       | 2022-06-30T10:50:12 |
| Spectrometer Frequency | 565 MHz             |
| Nucleus                | 19F                 |

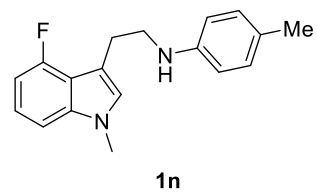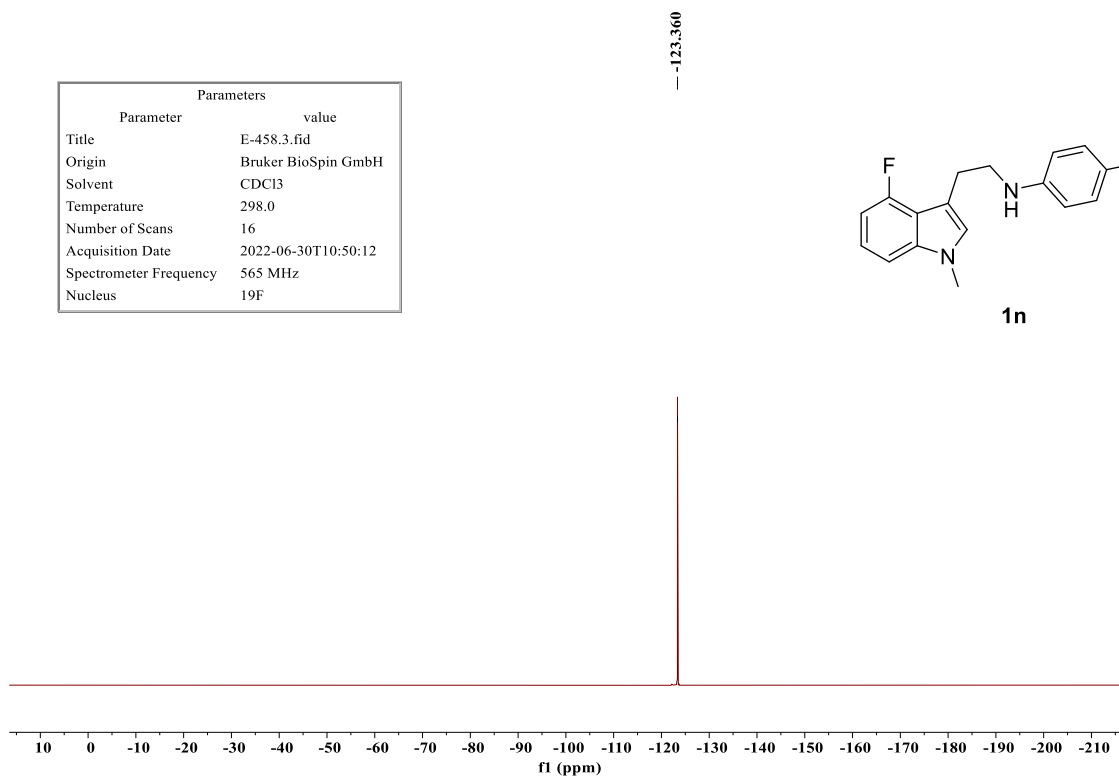

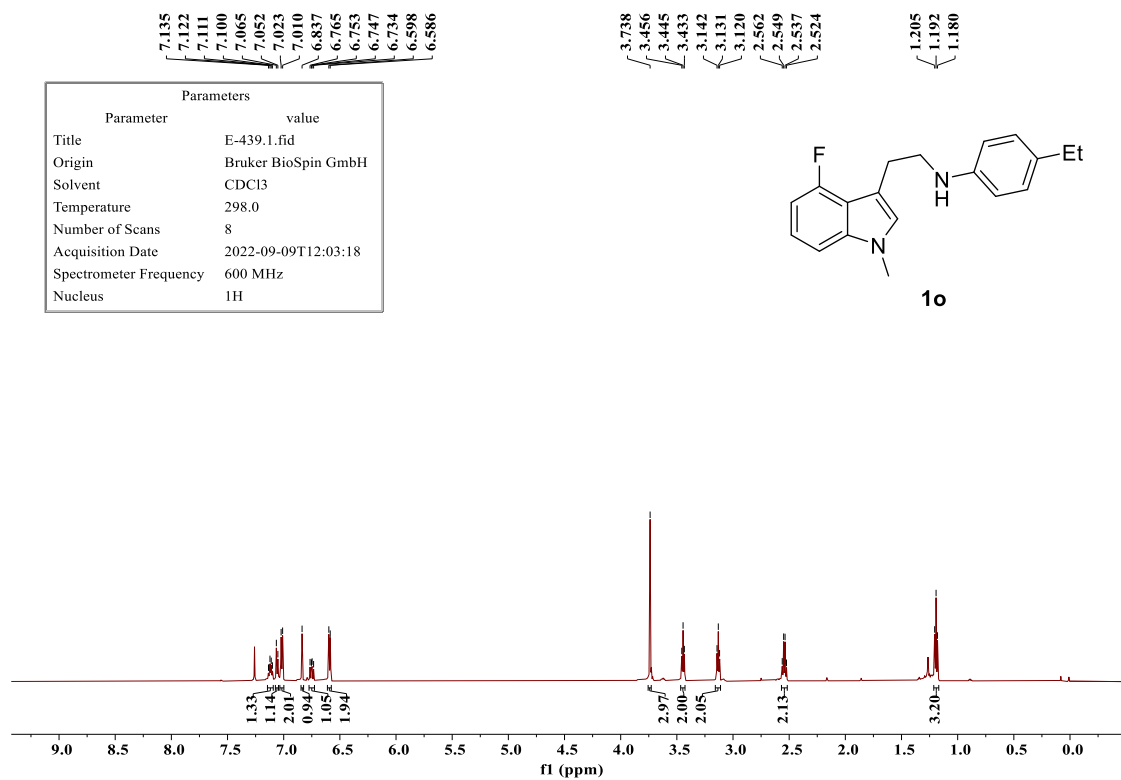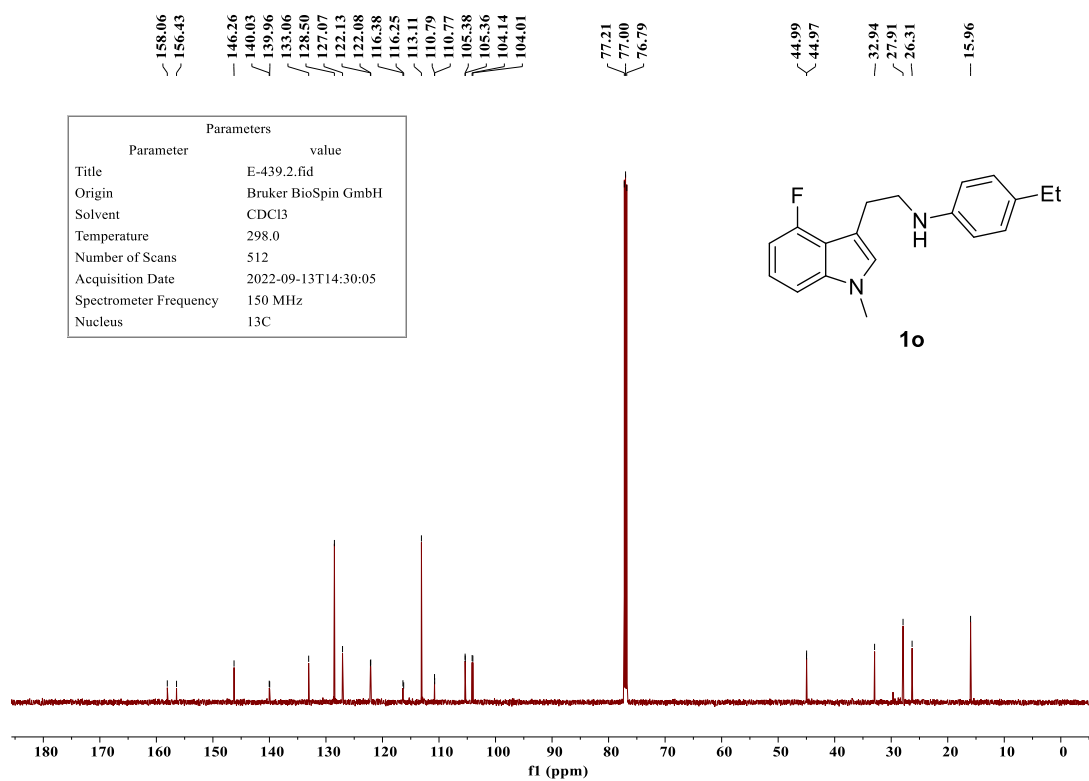

| Parameters             |                     |
|------------------------|---------------------|
| Parameter              | value               |
| Title                  | E-439.3.fid         |
| Origin                 | Bruker BioSpin GmbH |
| Solvent                | CDCl3               |
| Temperature            | 298.1               |
| Number of Scans        | 16                  |
| Acquisition Date       | 2022-09-13T14:31:44 |
| Spectrometer Frequency | 565 MHz             |
| Nucleus                | 19F                 |

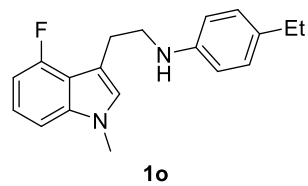

-123.393

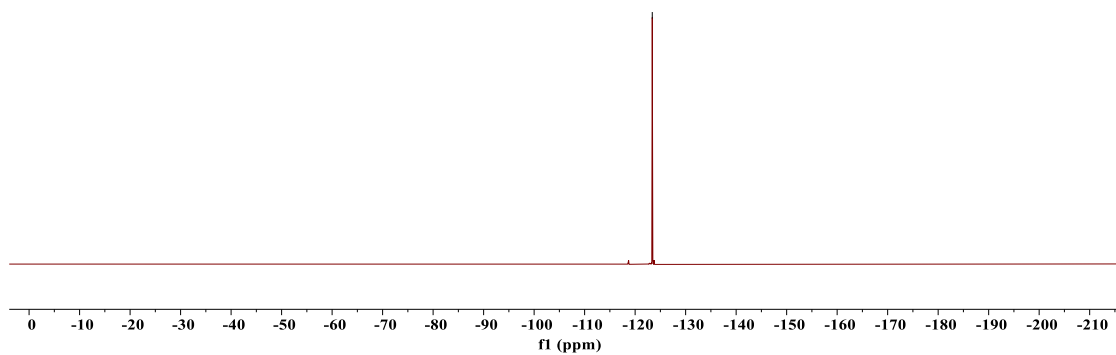

| Parameters             |                     |
|------------------------|---------------------|
| Parameter              | value               |
| Title                  | E-476.1.fid         |
| Origin                 | Bruker BioSpin GmbH |
| Solvent                | CDCl3               |
| Temperature            | 298.0               |
| Number of Scans        | 8                   |
| Acquisition Date       | 2022-06-23T02:53:08 |
| Spectrometer Frequency | 600 MHz             |
| Nucleus                | <sup>1</sup> H      |

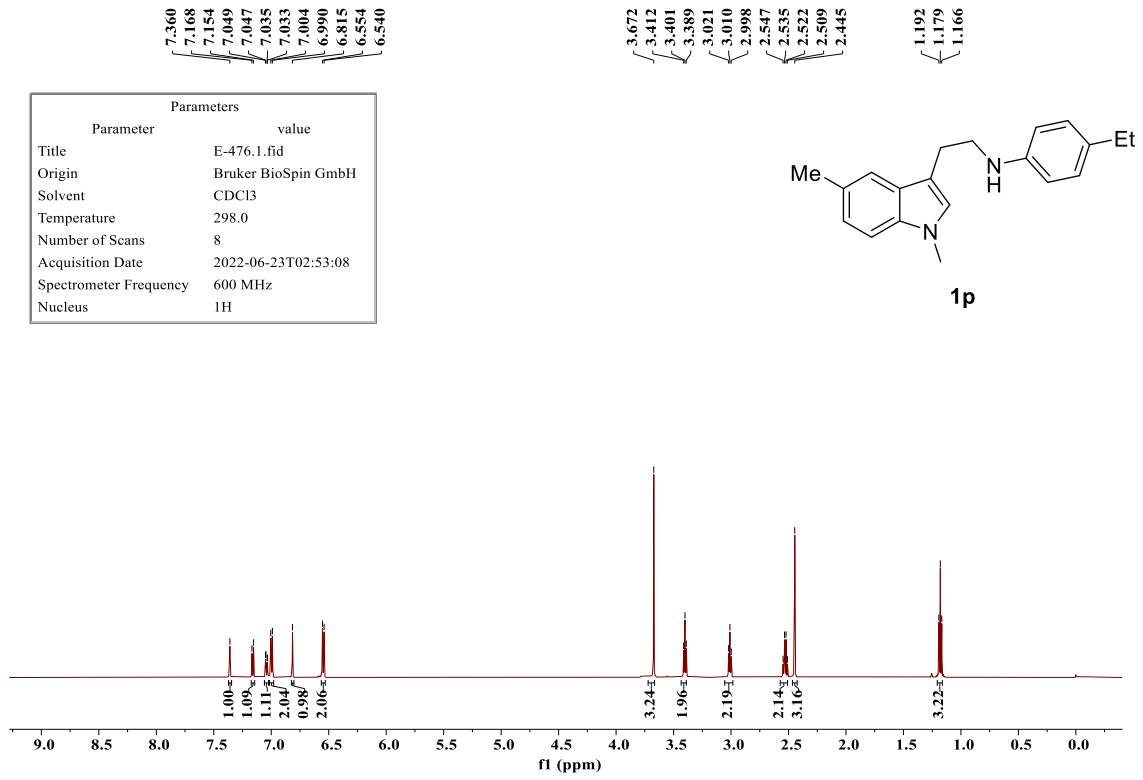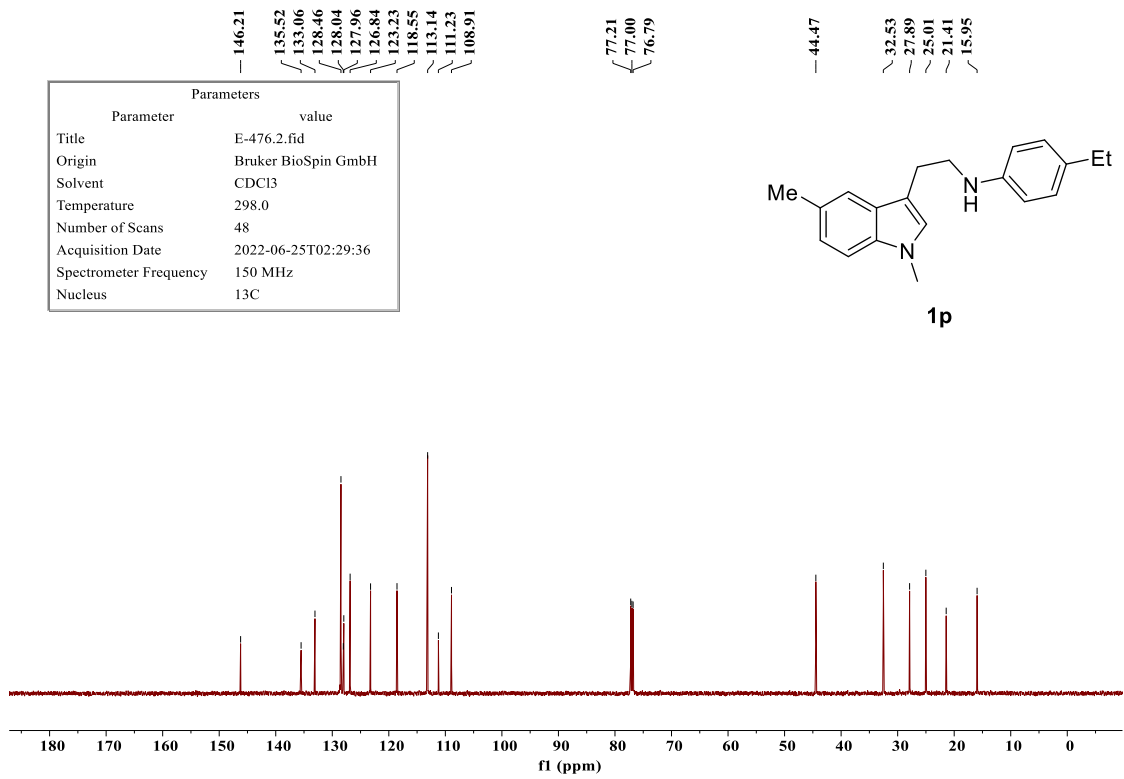

| Parameters             |                     |
|------------------------|---------------------|
| Parameter              | value               |
| Title                  | E-435.1.fid         |
| Origin                 | Bruker BioSpin GmbH |
| Solvent                | CDCl3               |
| Temperature            | 298.0               |
| Number of Scans        | 8                   |
| Acquisition Date       | 2022-06-26T16:25:56 |
| Spectrometer Frequency | 600 MHz             |
| Nucleus                | <sup>1</sup> H      |

7.457  
7.443  
7.254  
7.052  
7.038  
7.005  
6.991  
6.836  
6.548  
6.534

3.645  
3.394  
3.382  
3.371  
2.999  
2.987  
2.976  
2.546  
2.534  
2.521  
2.508

1.190  
1.179  
1.165

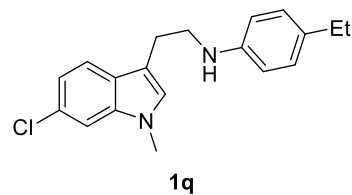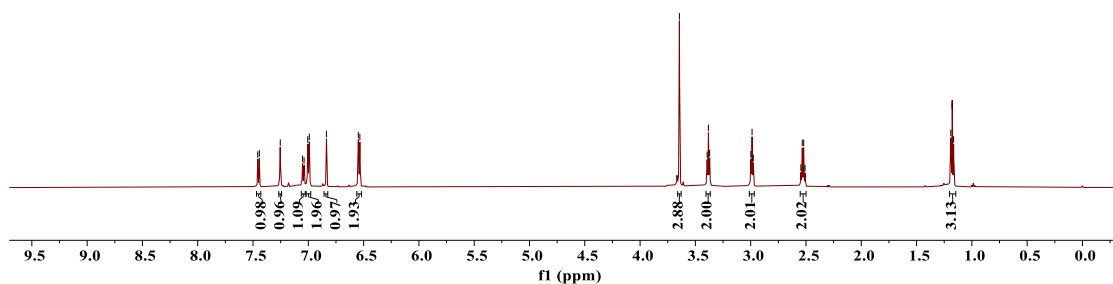

| Parameters             |                     |
|------------------------|---------------------|
| Parameter              | value               |
| Title                  | E-435.2.fid         |
| Origin                 | Bruker BioSpin GmbH |
| Solvent                | CDCl3               |
| Temperature            | 298.0               |
| Number of Scans        | 164                 |
| Acquisition Date       | 2022-06-26T16:34:33 |
| Spectrometer Frequency | 150 MHz             |
| Nucleus                | <sup>13</sup> C     |

146.00  
137.41  
133.23  
128.51  
127.70  
127.37  
126.42  
119.74  
119.44  
113.11  
112.23  
109.24

77.21  
77.00  
76.79

44.43

32.59  
27.87  
24.89  
15.93

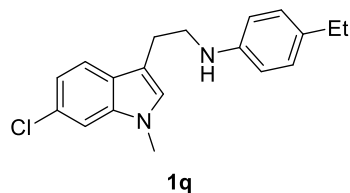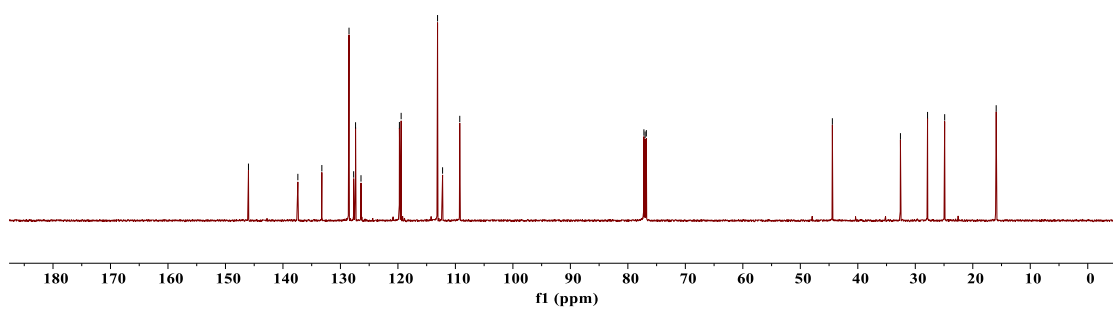



7.609  
7.596  
7.263  
7.261  
7.250  
7.246  
7.237  
7.232  
7.225  
7.217  
7.213  
7.173  
7.161  
7.150  
7.136  
7.124  
7.113  
7.109  
7.097  
7.084  
7.063  
7.051  
6.903  
6.683  
6.671  
6.659  
6.566  
6.553  
5.186

3.427  
3.415  
3.404  
3.049  
3.038  
3.026

| Parameters             |                     |
|------------------------|---------------------|
| Parameter              | value               |
| Title                  | E-3073.1.fid        |
| Origin                 | Bruker BioSpin GmbH |
| Solvent                | CDCl3               |
| Temperature            | 298.0               |
| Number of Scans        | 8                   |
| Acquisition Date       | 2022-06-29T02:24:01 |
| Spectrometer Frequency | 600 MHz             |
| Nucleus                | 1H                  |

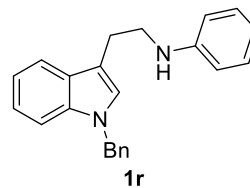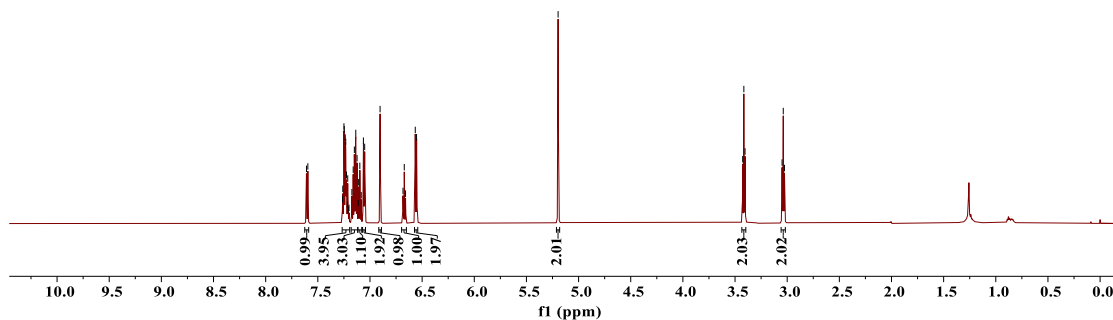

148.12  
137.56  
136.75  
129.17  
128.68  
128.01  
127.52  
126.71  
126.13  
121.87  
119.10  
118.95  
117.25  
112.95  
112.47  
109.71

77.22  
77.00  
76.79

49.75  
43.96

25.00

| Parameters             |                     |
|------------------------|---------------------|
| Parameter              | value               |
| Title                  | E-3073.2.fid        |
| Origin                 | Bruker BioSpin GmbH |
| Solvent                | CDCl3               |
| Temperature            | 298.0               |
| Number of Scans        | 512                 |
| Acquisition Date       | 2022-07-01T04:37:30 |
| Spectrometer Frequency | 150 MHz             |
| Nucleus                | 13C                 |

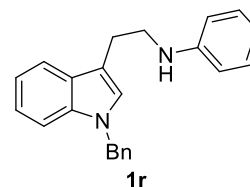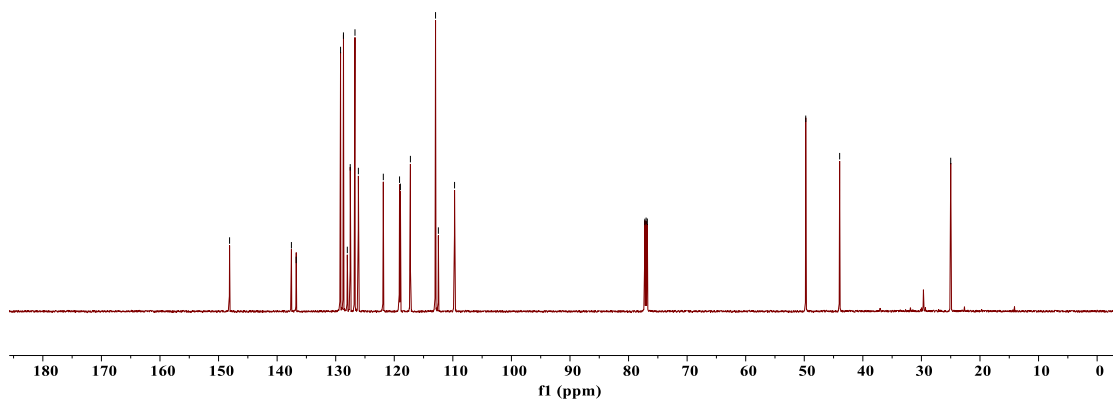

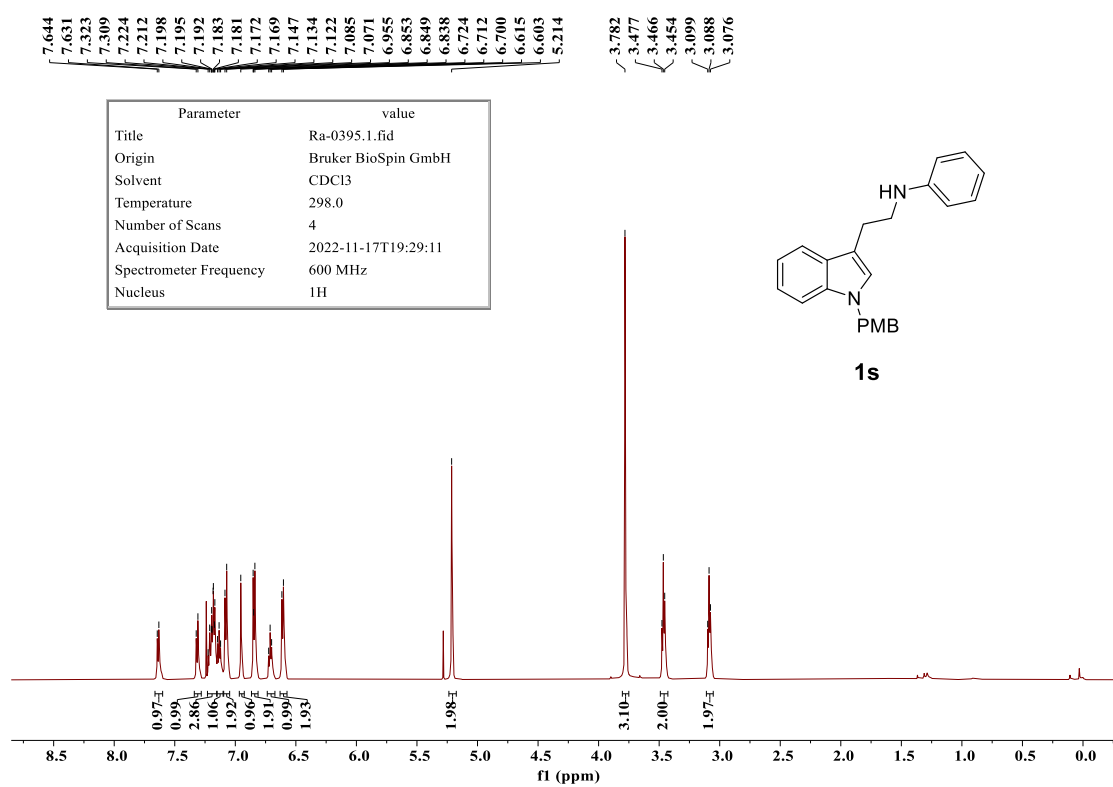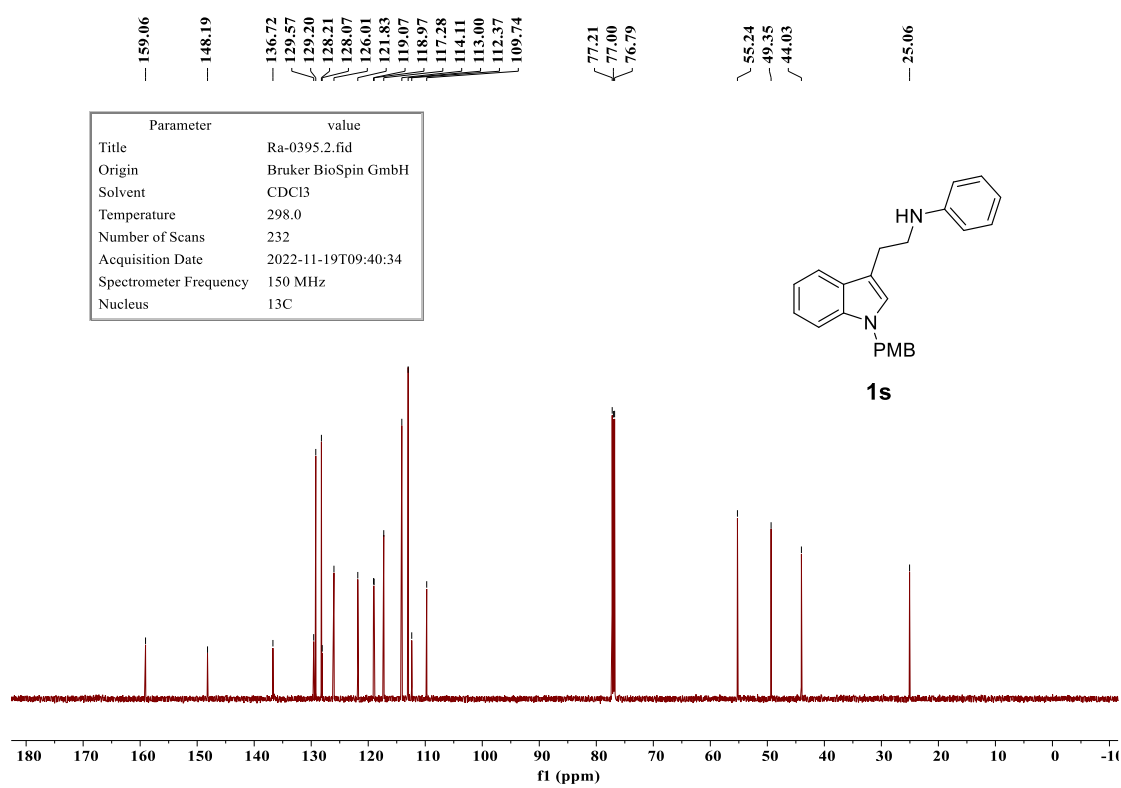

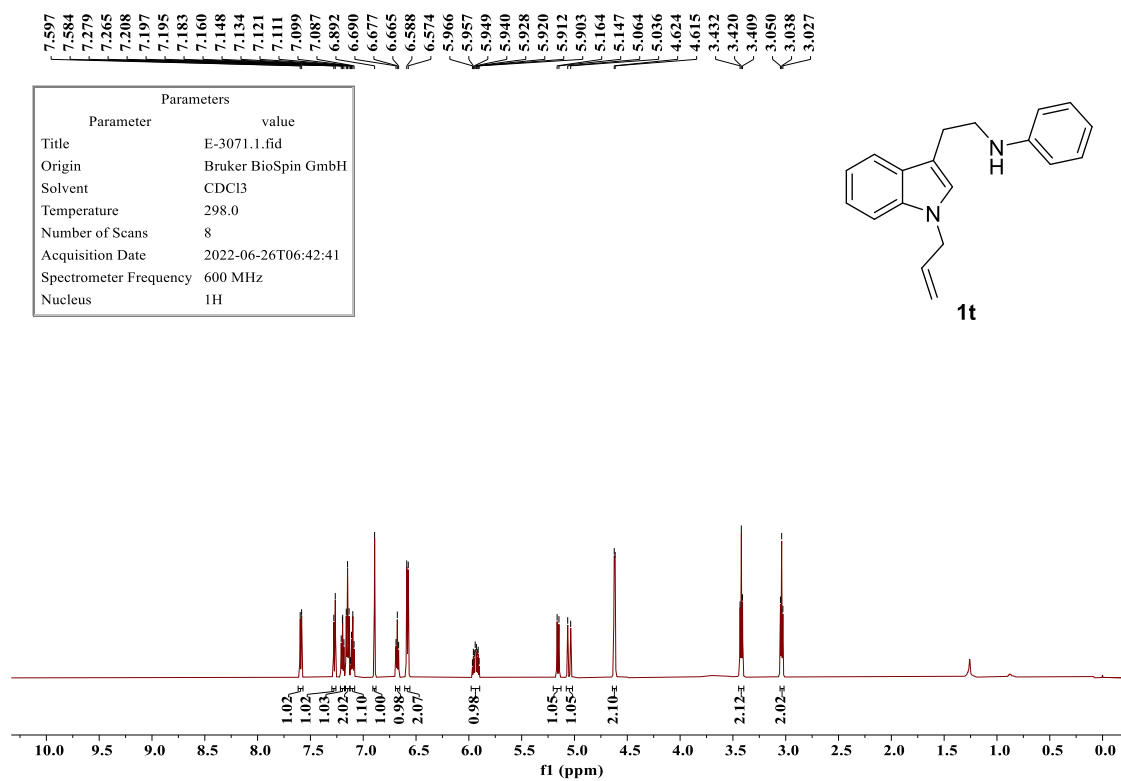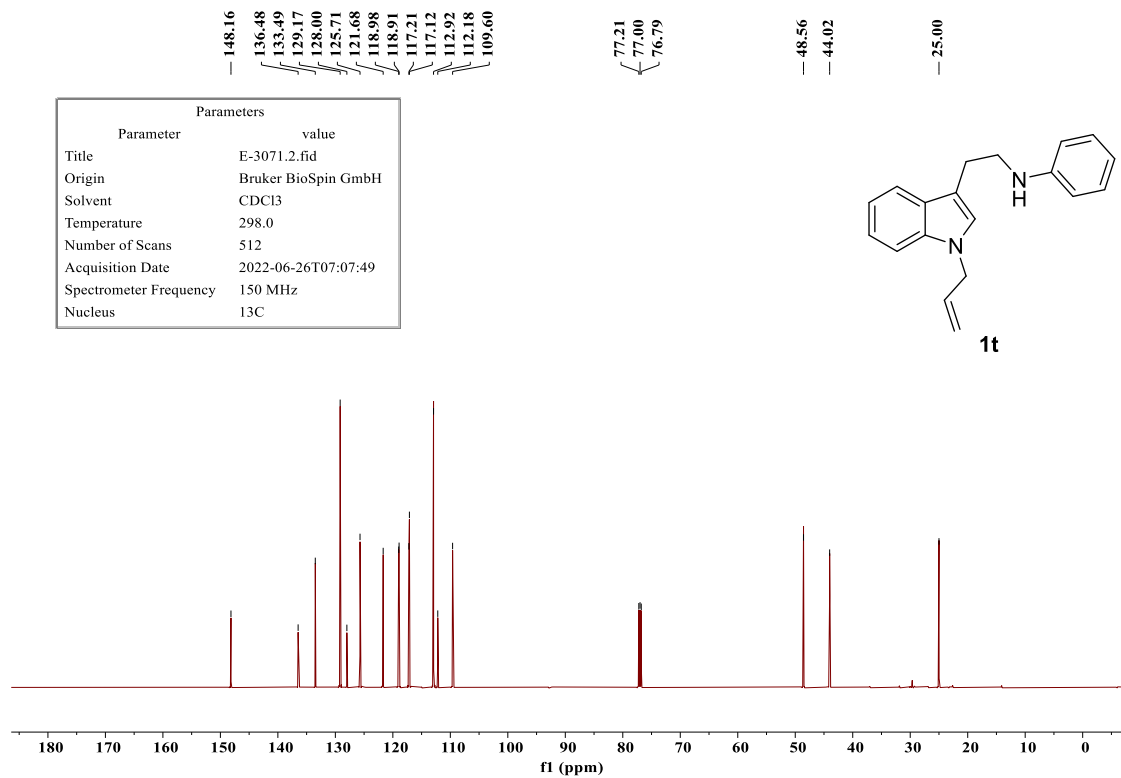

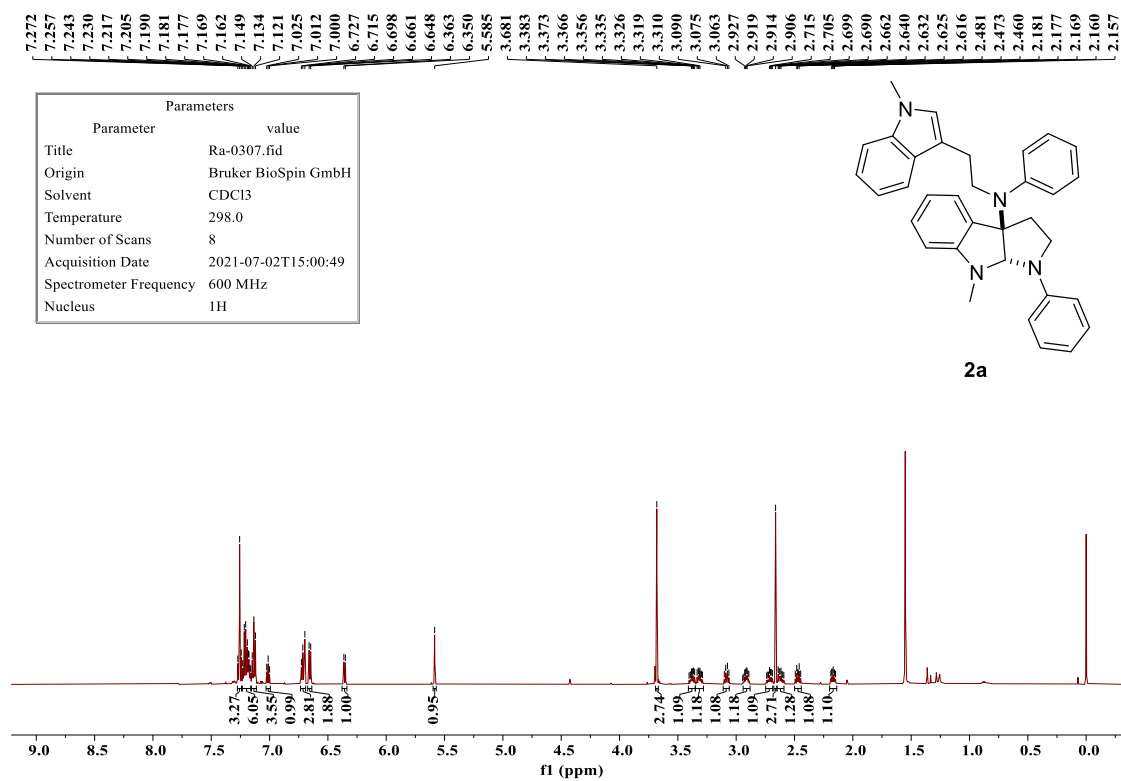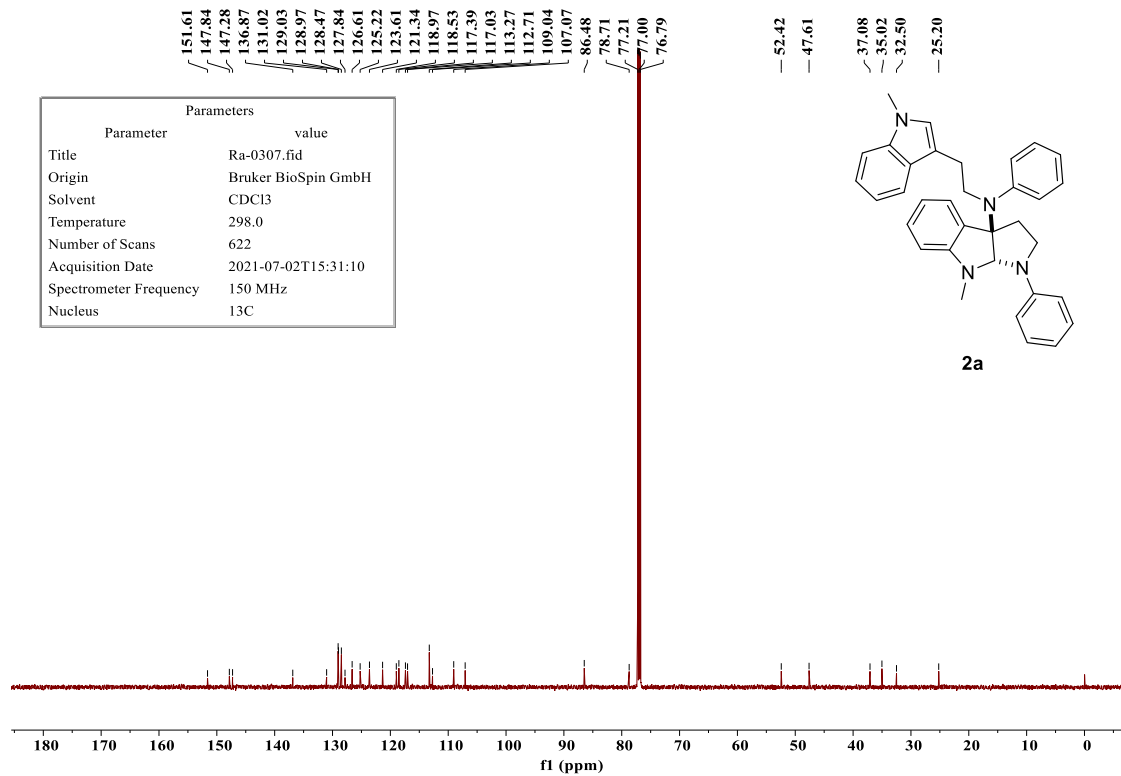

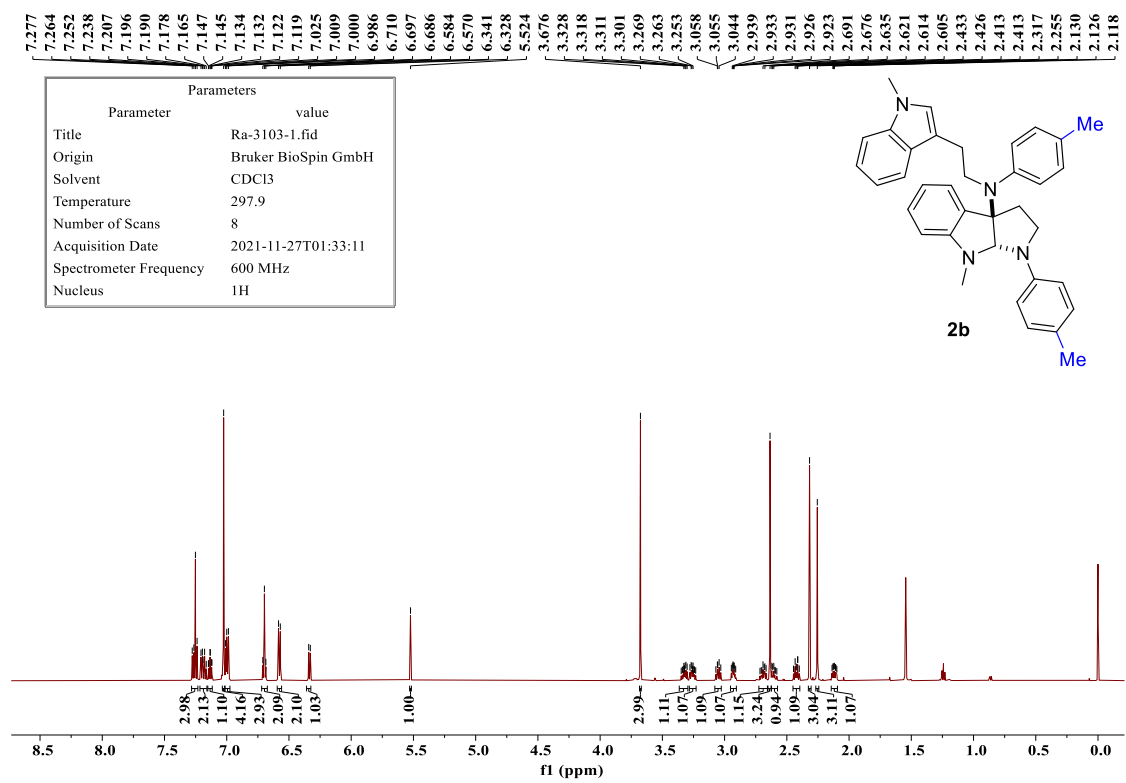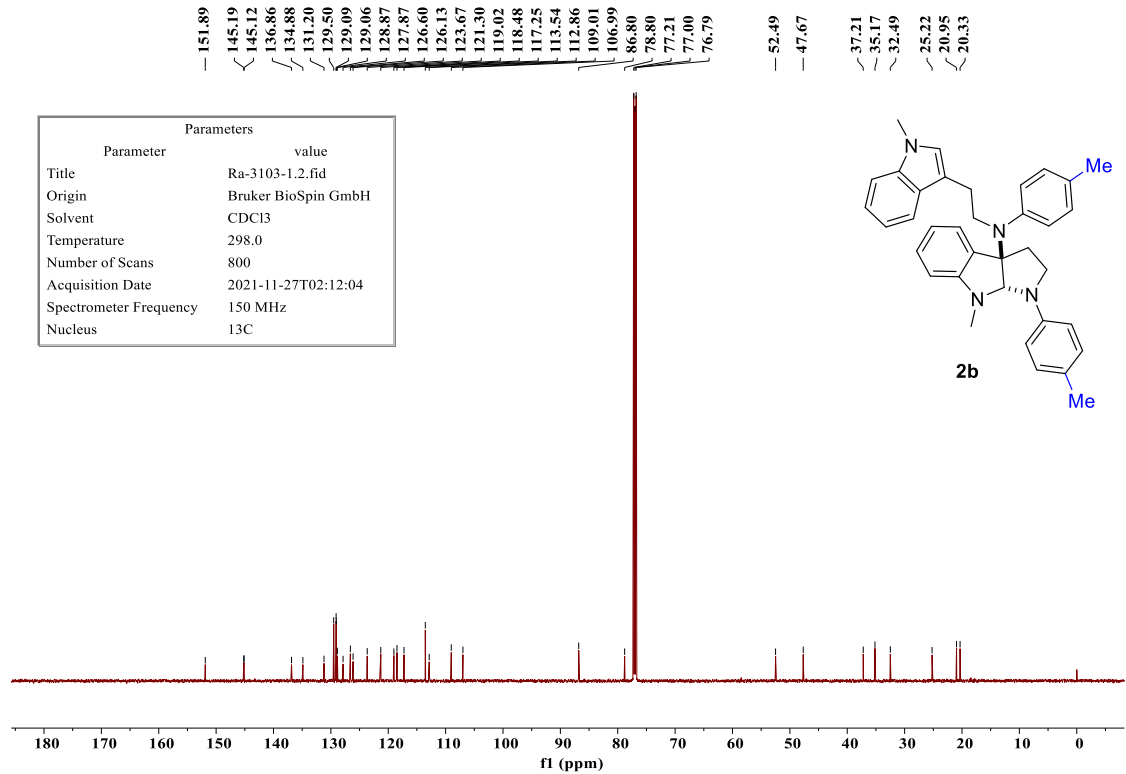

7.275  
7.262  
7.249  
7.243  
7.235  
7.213  
7.211  
7.201  
7.199  
7.189  
7.188  
7.176  
7.164  
7.162  
7.149  
7.147  
7.137  
7.135  
7.124  
7.122  
7.038  
7.026  
7.022  
7.012  
7.009  
7.007  
6.997  
6.996  
6.712  
6.702  
6.689  
6.602  
6.587  
6.344  
6.331  
5.529  
3.671  
3.056  
3.043  
3.041  
2.698  
2.638  
2.630  
2.622  
2.609  
2.596  
2.578  
2.565  
2.553  
2.540  
2.439  
2.418  
1.238  
1.226  
1.220  
1.213  
1.207  
1.195

| Parameters             |                     |
|------------------------|---------------------|
| Parameter              | value               |
| Title                  | Ra-3195-1.1.fid     |
| Origin                 | Bruker BioSpin GmbH |
| Solvent                | CDC13               |
| Temperature            | 298.0               |
| Number of Scans        | 8                   |
| Acquisition Date       | 2021-12-28T13:36:48 |
| Spectrometer Frequency | 600 MHz             |
| Nucleus                | <sup>1</sup> H      |

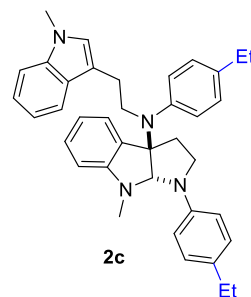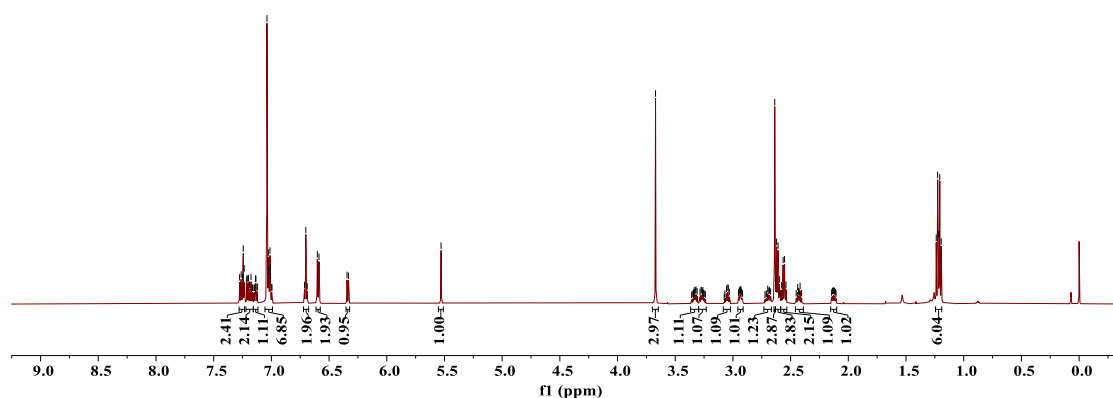

151.94  
145.36  
145.30  
141.20  
136.86  
132.73  
131.15  
128.94  
128.87  
128.29  
127.88  
127.80  
126.59  
123.69  
121.29  
119.02  
118.47  
117.25  
113.47  
112.88  
109.01  
107.04

86.79  
78.82  
77.21  
77.00  
76.79

52.43  
47.65

37.20  
35.18  
32.48  
28.32  
27.84  
25.21

15.89  
15.59

| Parameters             |                     |
|------------------------|---------------------|
| Parameter              | value               |
| Title                  | Ra-3195-1.2.fid     |
| Origin                 | Bruker BioSpin GmbH |
| Solvent                | CDC13               |
| Temperature            | 298.0               |
| Number of Scans        | 800                 |
| Acquisition Date       | 2021-12-31T07:47:10 |
| Spectrometer Frequency | 150 MHz             |
| Nucleus                | <sup>13</sup> C     |

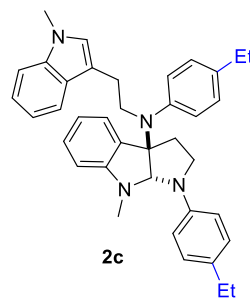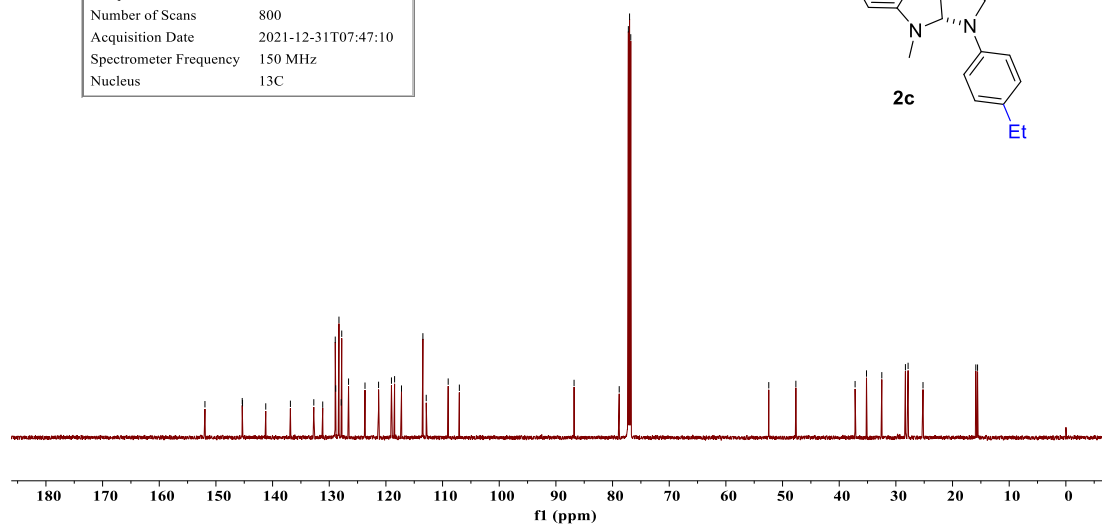

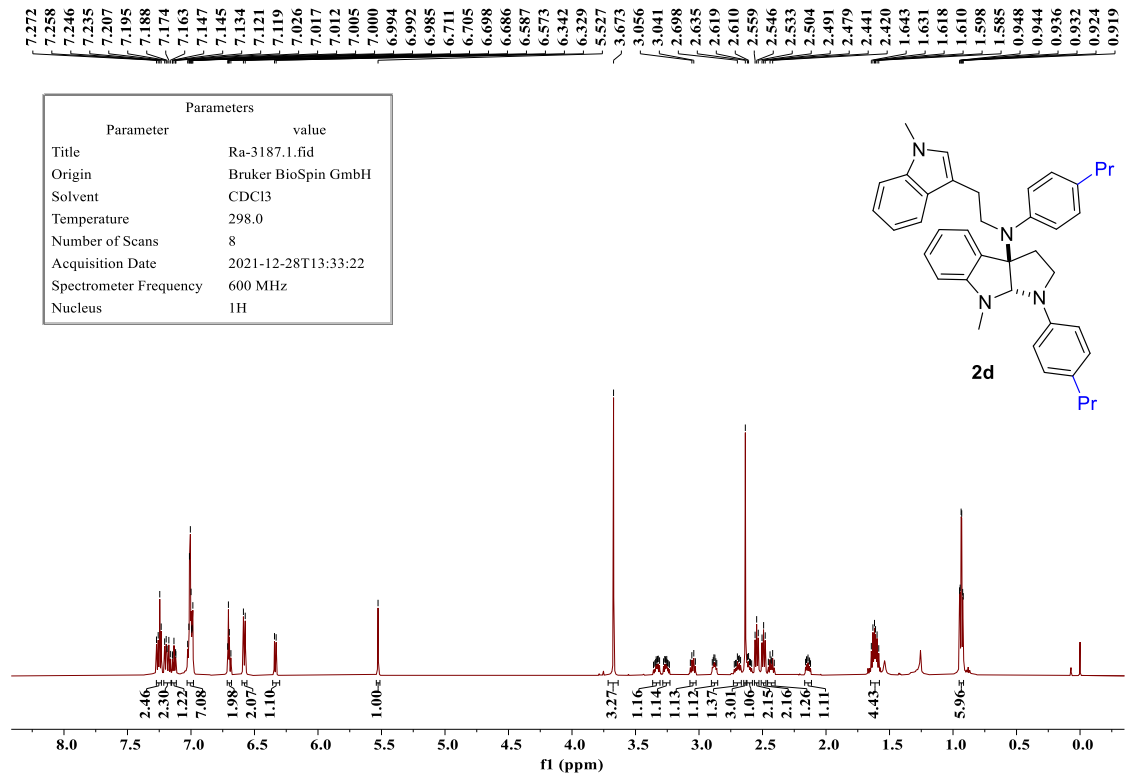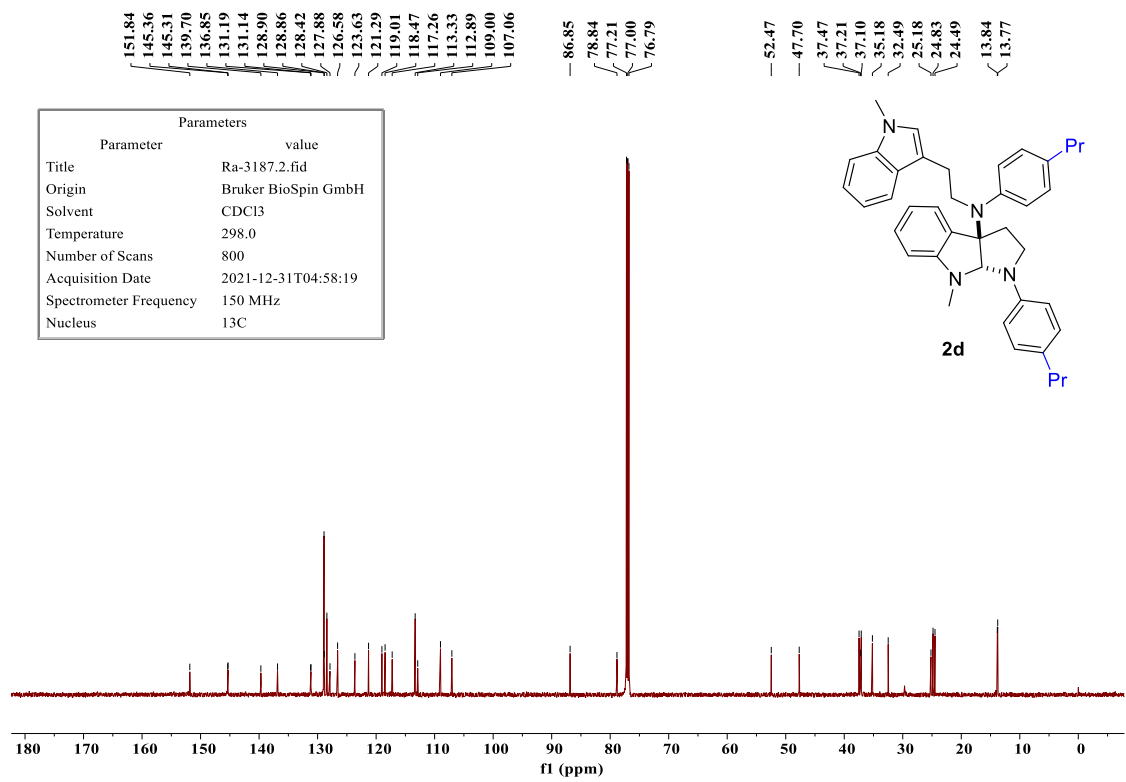

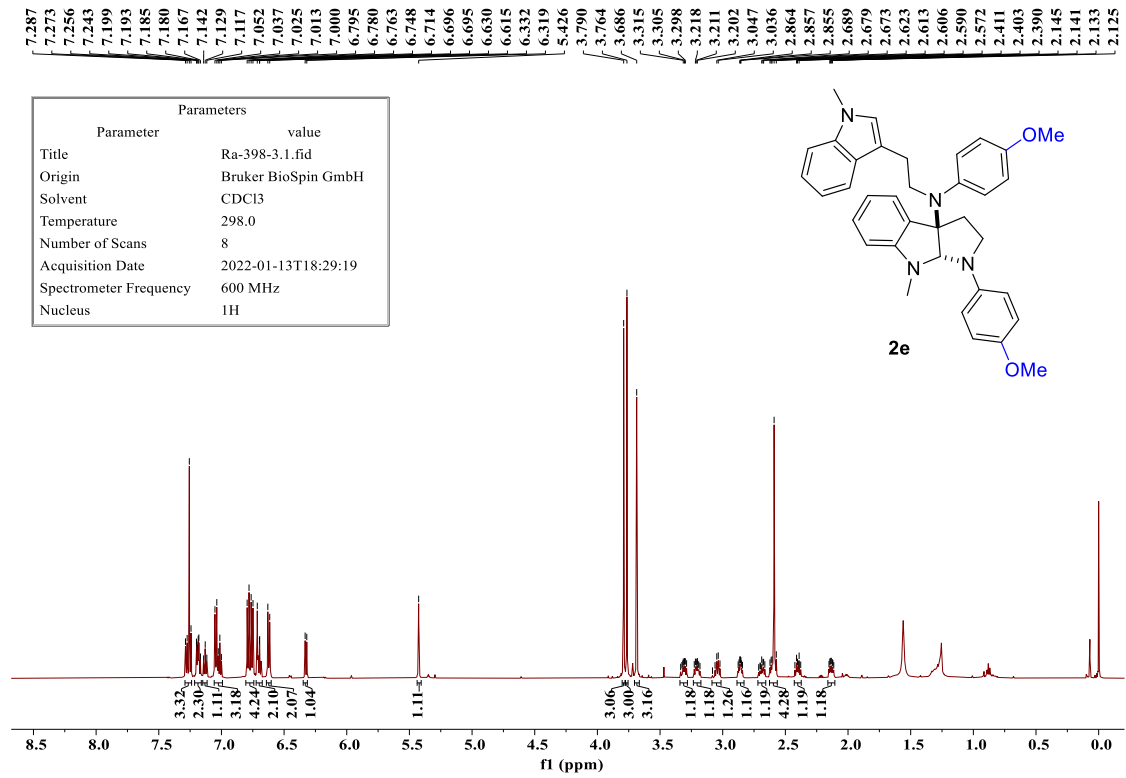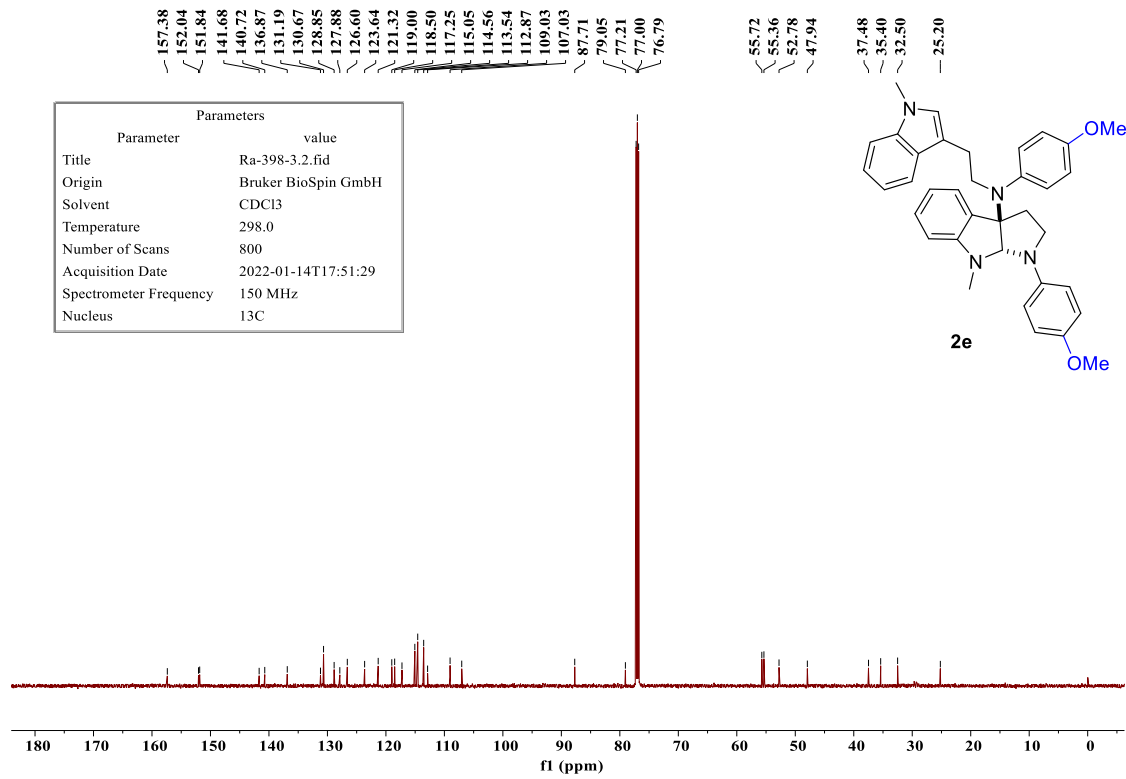



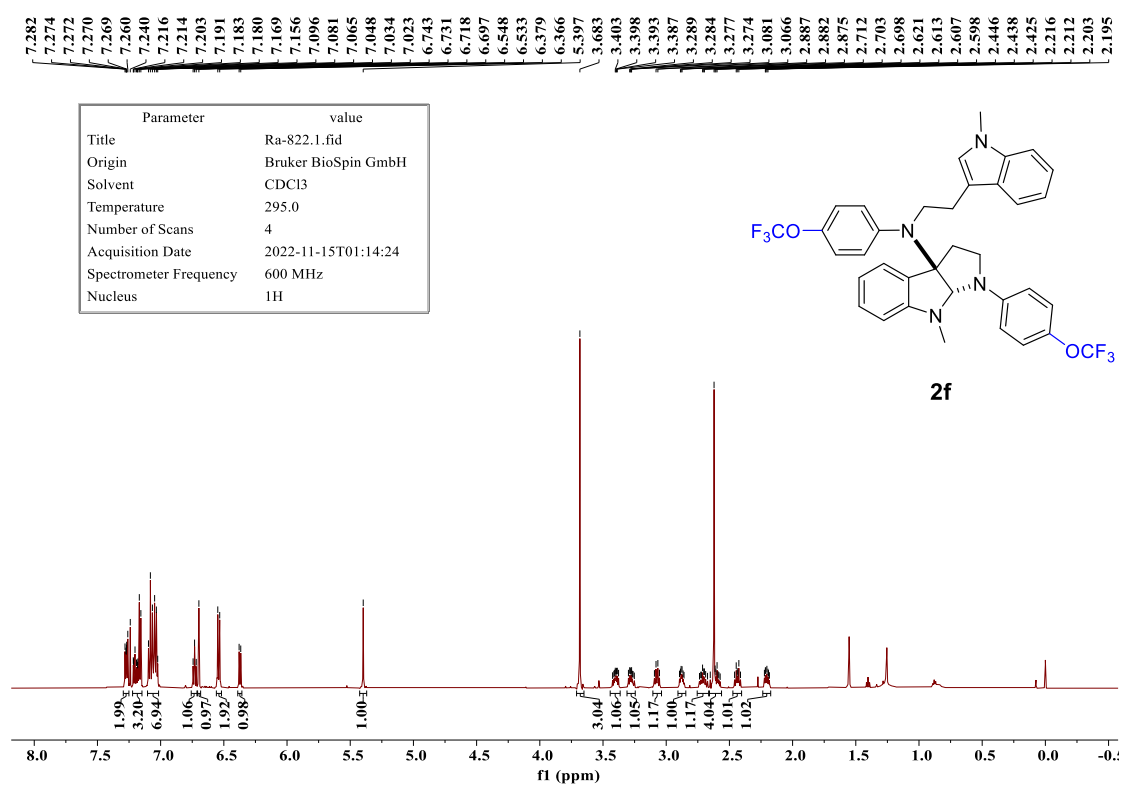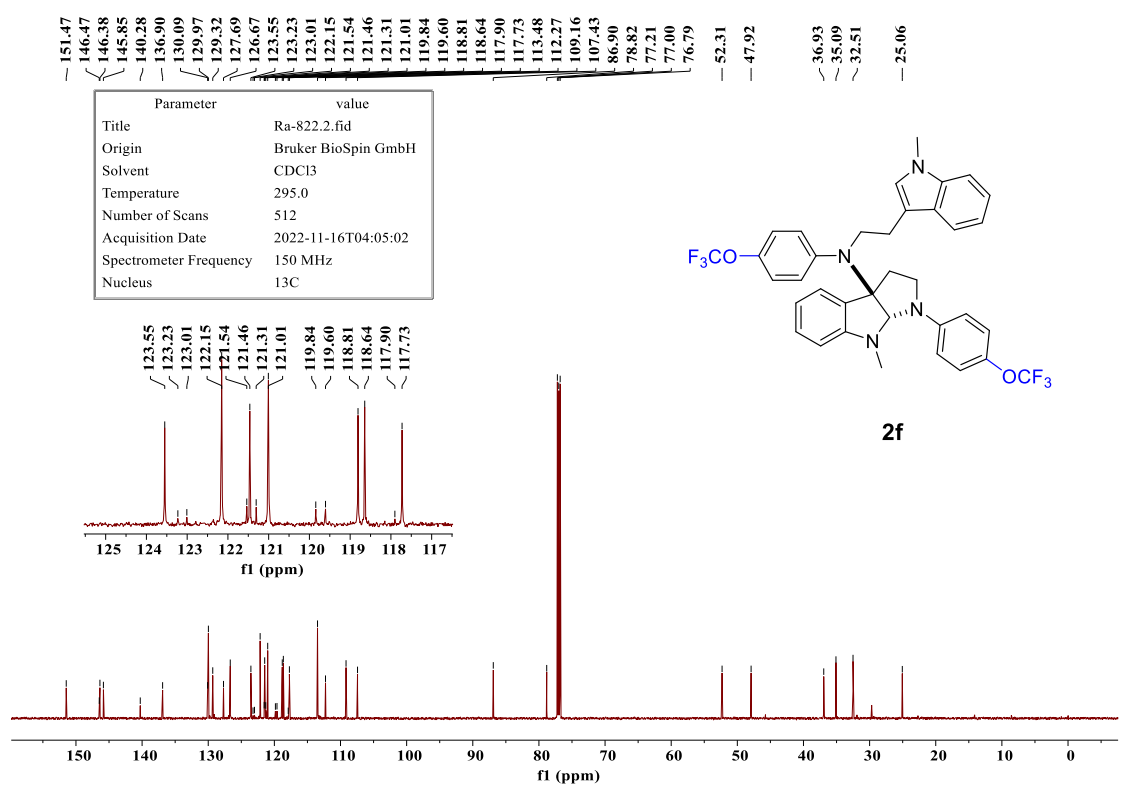

| Parameter              | value               |
|------------------------|---------------------|
| Title                  | Ra-822.3.fid        |
| Origin                 | Bruker BioSpin GmbH |
| Solvent                | CDCl3               |
| Temperature            | 295.1               |
| Number of Scans        | 16                  |
| Acquisition Date       | 2022-11-16T04:06:26 |
| Spectrometer Frequency | 564.63 MHz          |
| Nucleus                | 19F                 |

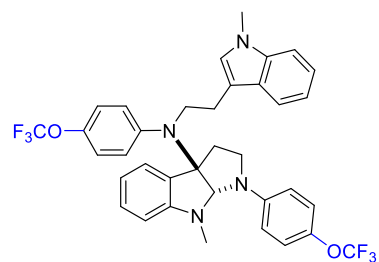

-57.933  
-58.394

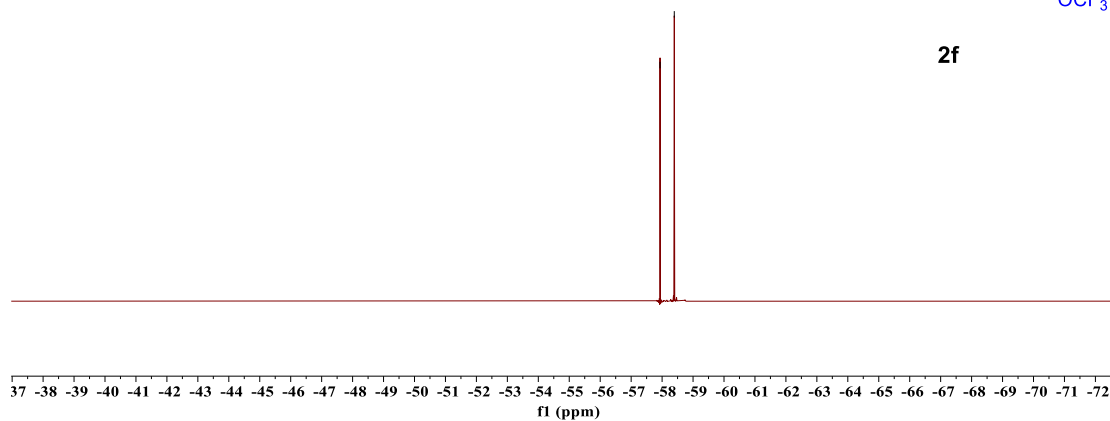

7.490  
7.476  
7.428  
7.414  
7.284  
7.271  
7.256  
7.246  
7.229  
7.216  
7.203  
7.191  
7.169  
7.157  
7.146  
7.132  
7.058  
7.046  
7.034  
6.763  
6.750  
6.738  
6.660  
6.657  
6.641  
6.427  
6.414  
5.567  
3.686  
3.527  
3.518  
3.511  
3.502  
3.490  
3.479  
3.475  
3.464  
3.198  
3.191  
3.185  
3.179  
3.174  
3.167  
3.156  
2.772  
2.763  
2.757  
2.696  
2.659  
2.646  
2.638  
2.625  
2.232  
2.228  
2.221  
2.218  
2.211  
2.207

| Parameters             |                     |
|------------------------|---------------------|
| Parameter              | value               |
| Title                  | E-2.1.fid           |
| Origin                 | Bruker BioSpin GmbH |
| Solvent                | CDCl3               |
| Temperature            | 298.0               |
| Number of Scans        | 8                   |
| Acquisition Date       | 2022-04-11T20:47:52 |
| Spectrometer Frequency | 600 MHz             |
| Nucleus                | 1H                  |

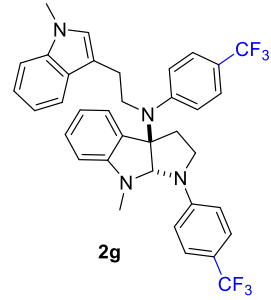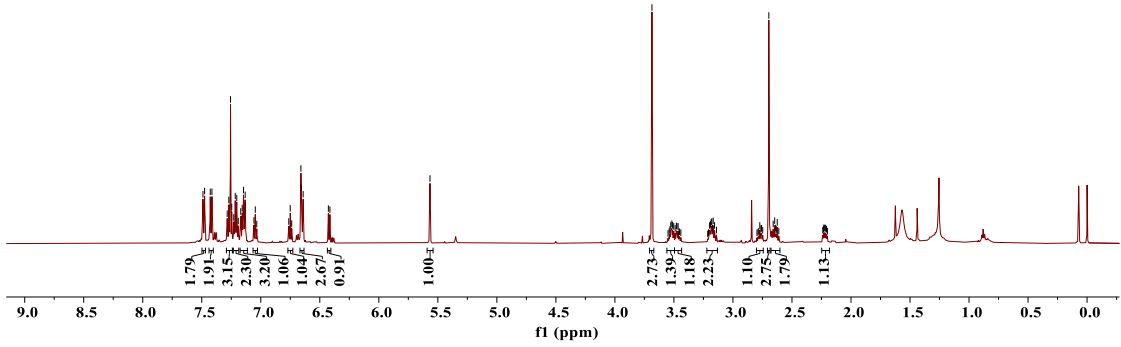

151.23  
150.79  
149.37  
136.93  
129.80  
129.58  
129.16  
127.62  
126.46  
125.73  
123.88  
121.57  
118.78  
118.75  
117.93  
113.05  
112.48  
111.89  
109.23  
107.34  
85.86  
78.27  
77.21  
77.00  
76.79  
51.48  
47.51  
36.60  
34.73  
32.54  
25.04

| Parameters             |                     |
|------------------------|---------------------|
| Parameter              | value               |
| Title                  | E-2.2.fid           |
| Origin                 | Bruker BioSpin GmbH |
| Solvent                | CDCl3               |
| Temperature            | 298.0               |
| Number of Scans        | 800                 |
| Acquisition Date       | 2022-04-13T00:46:09 |
| Spectrometer Frequency | 150 MHz             |
| Nucleus                | 13C                 |

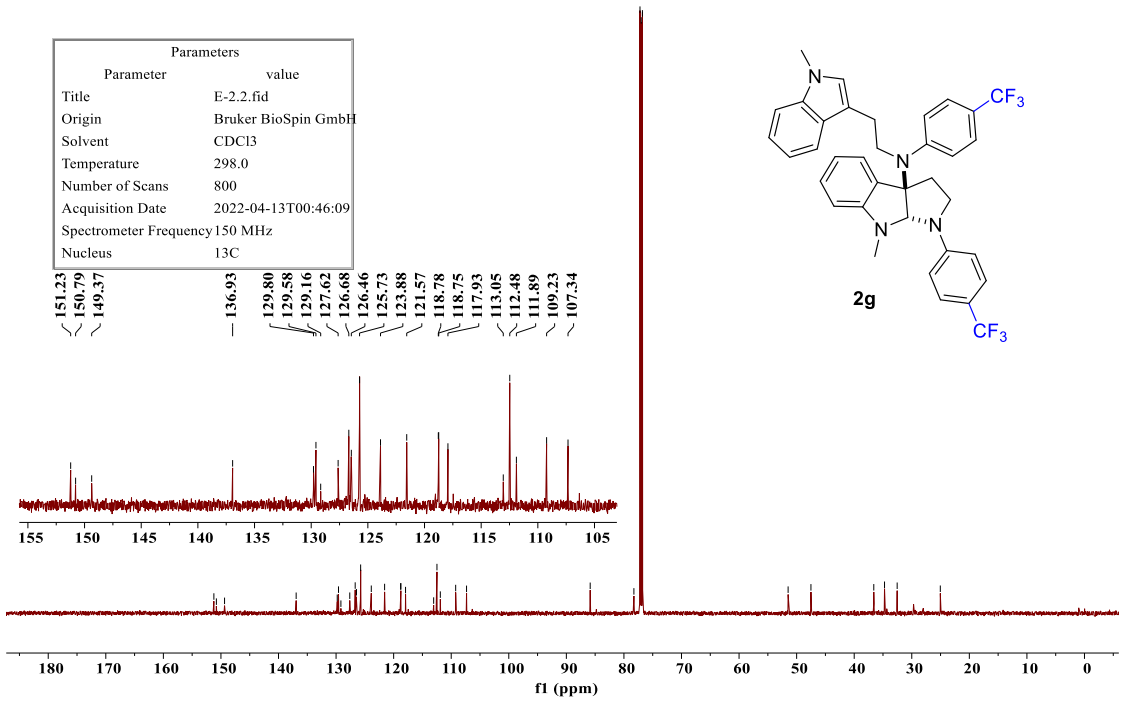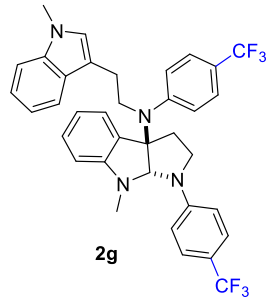

| Parameters             |                     |
|------------------------|---------------------|
| Parameter              | value               |
| Title                  | E-2.3.fid           |
| Origin                 | Bruker BioSpin GmbH |
| Solvent                | CDCl3               |
| Temperature            | 297.9               |
| Number of Scans        | 16                  |
| Acquisition Date       | 2022-04-13T00:47:38 |
| Spectrometer Frequency | 565 MHz             |
| Nucleus                | 19F                 |

~ -61.048  
~ -61.876

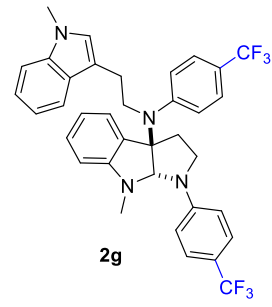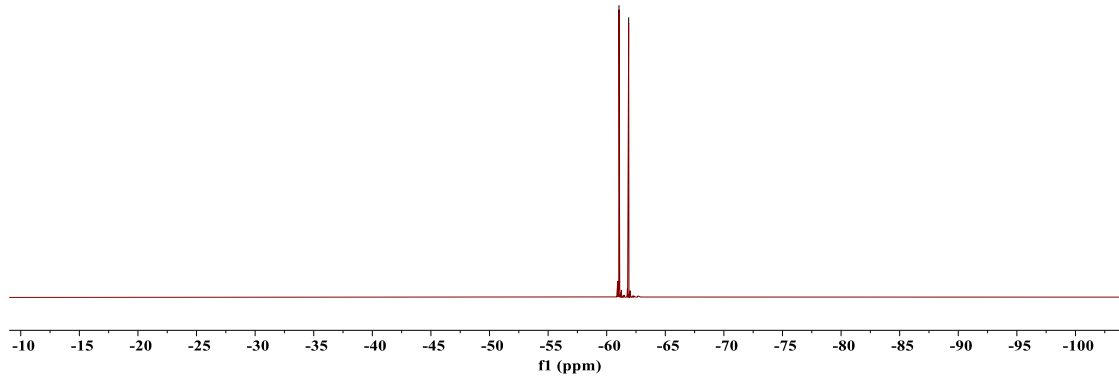

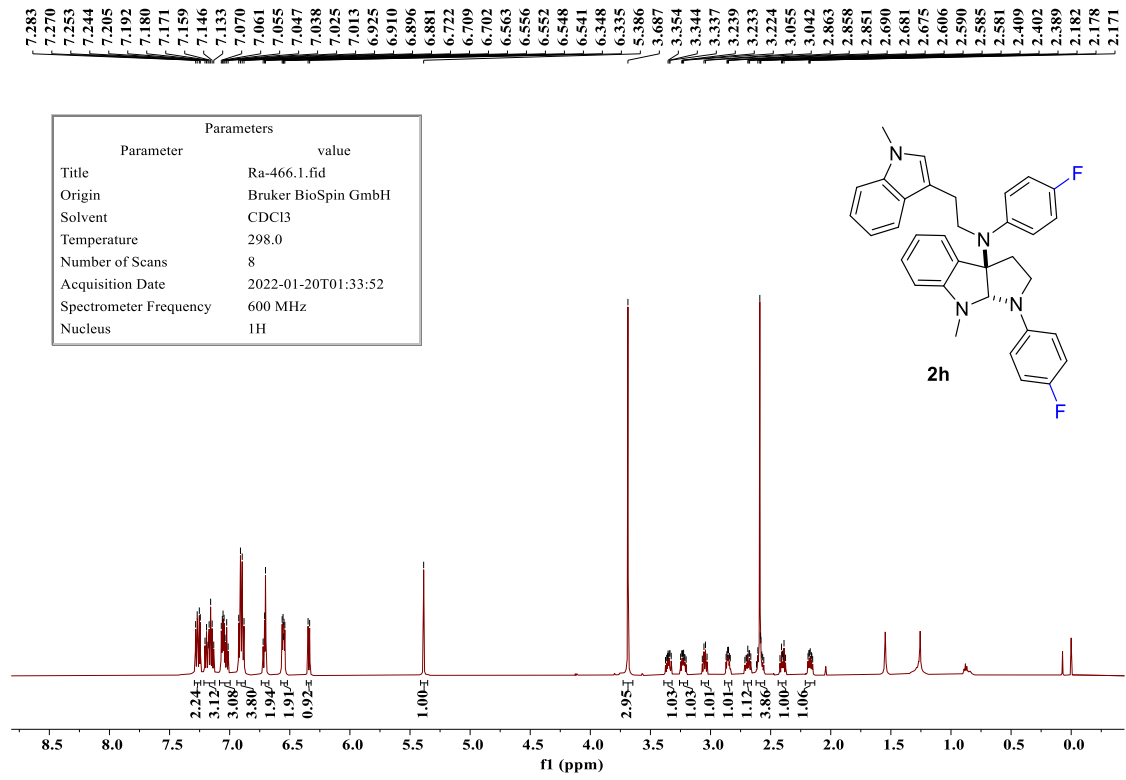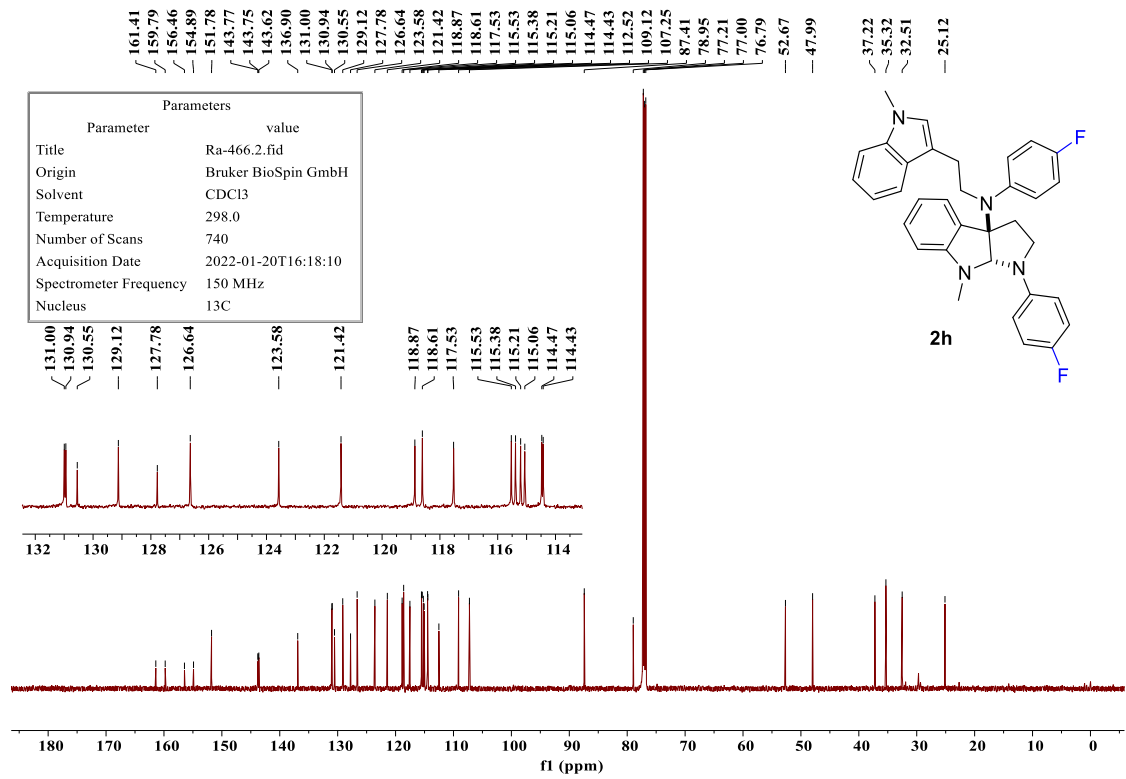

| Parameters             |                     |
|------------------------|---------------------|
| Parameter              | value               |
| Title                  | Ra-466.3.fid        |
| Origin                 | Bruker BioSpin GmbH |
| Solvent                | CDC13               |
| Temperature            | 297.9               |
| Number of Scans        | 16                  |
| Acquisition Date       | 2022-01-20T16:19:51 |
| Spectrometer Frequency | 565 MHz             |
| Nucleus                | 19F                 |

-- -116.531

-- -128.014

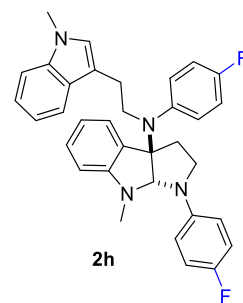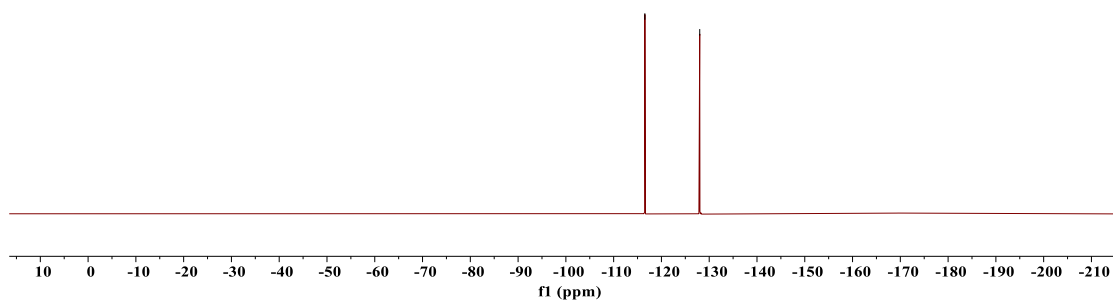

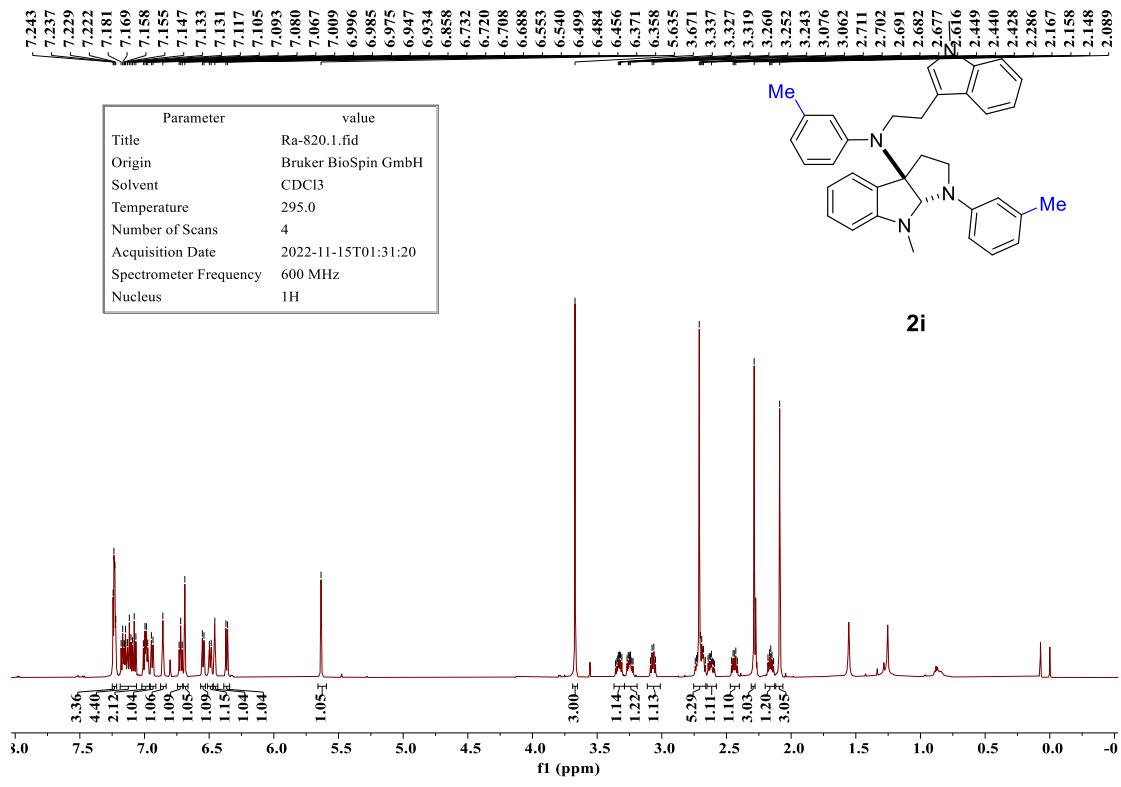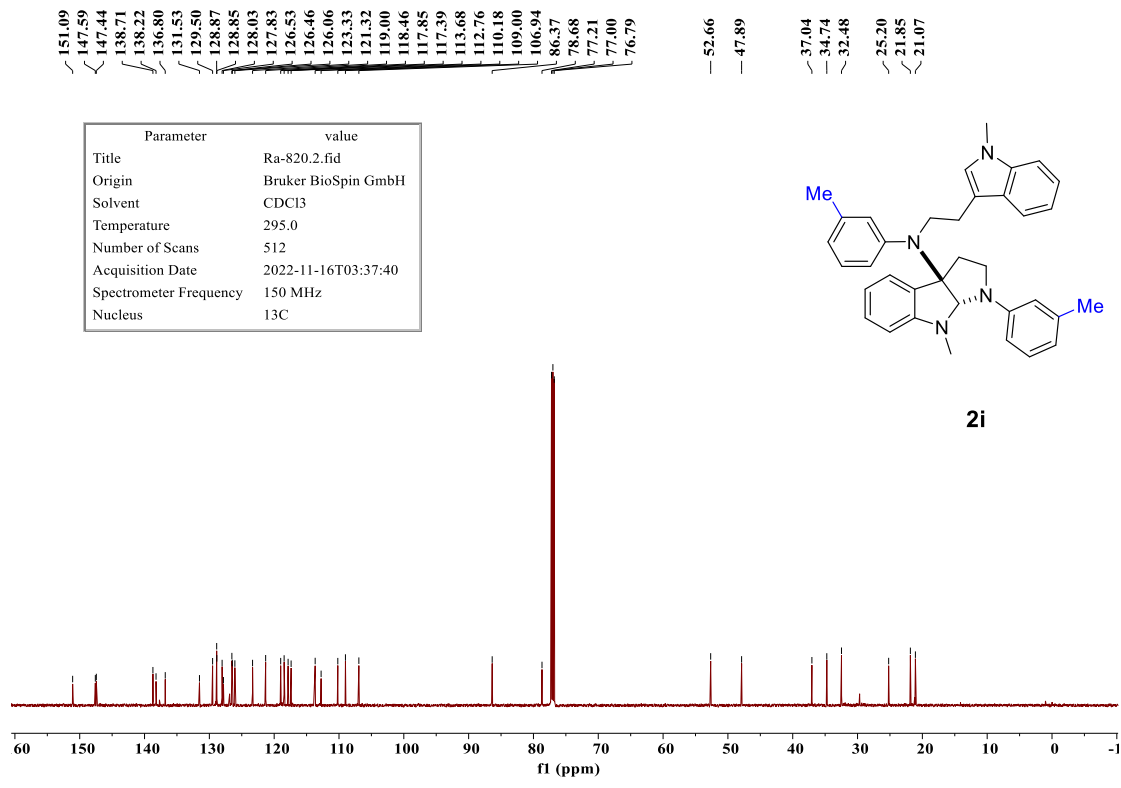

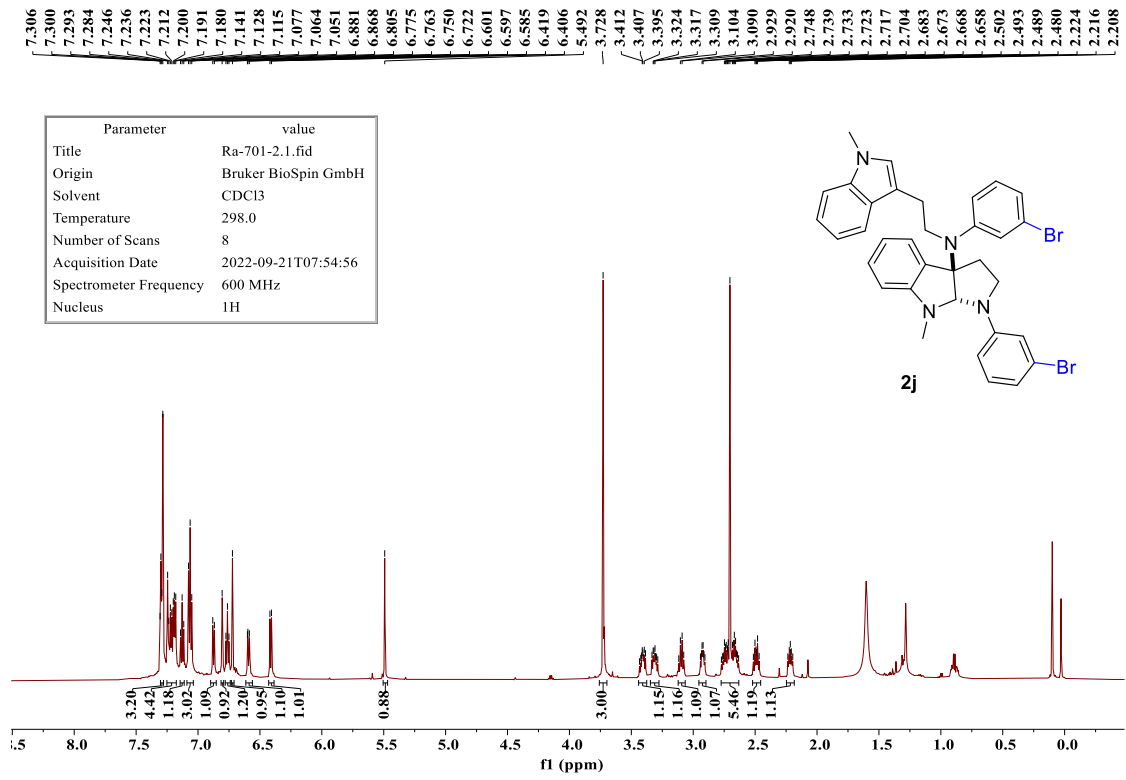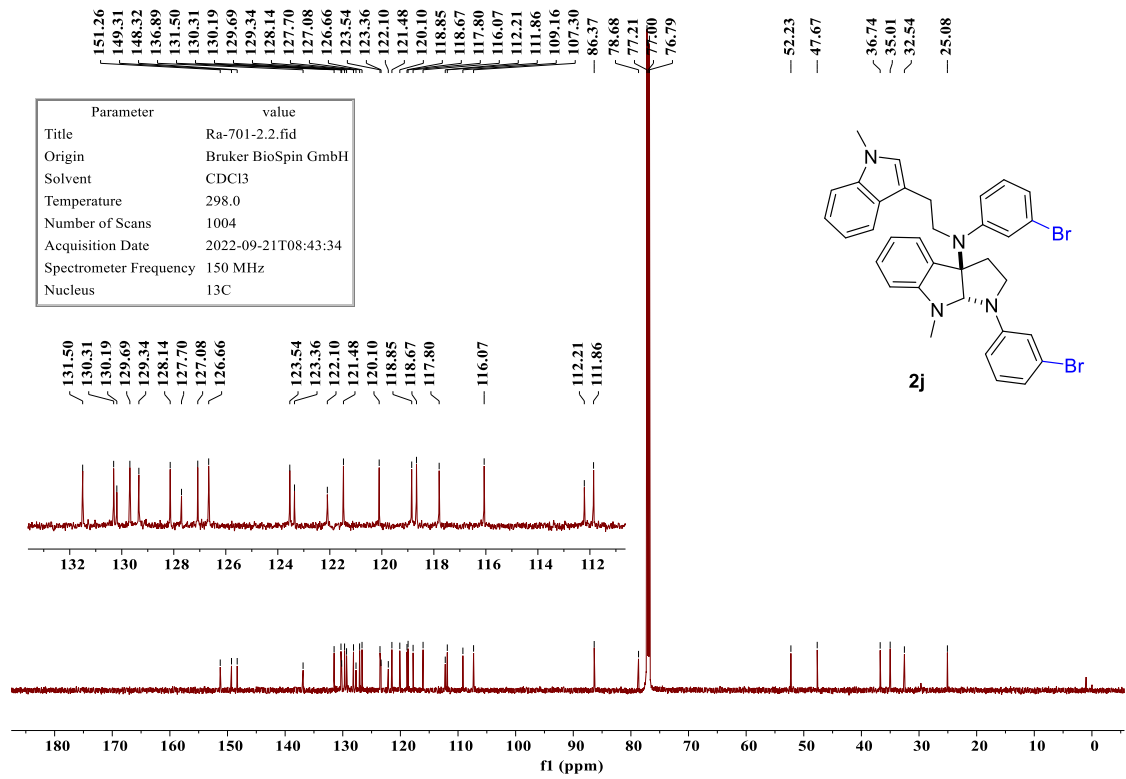



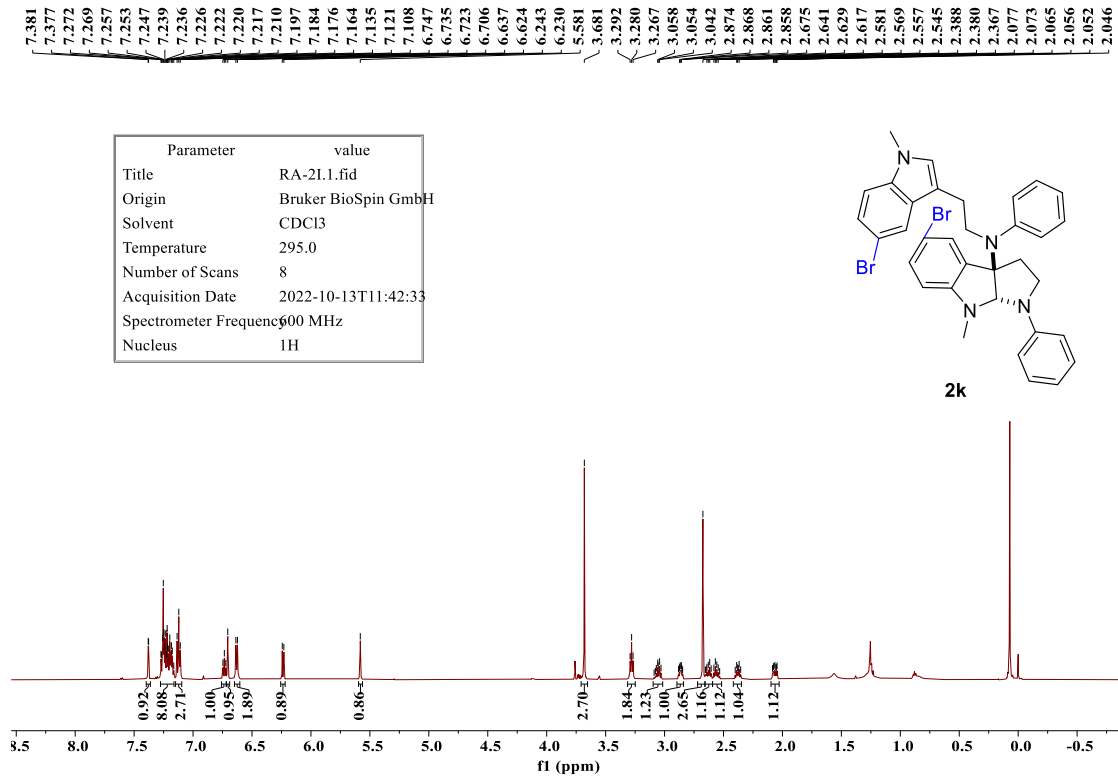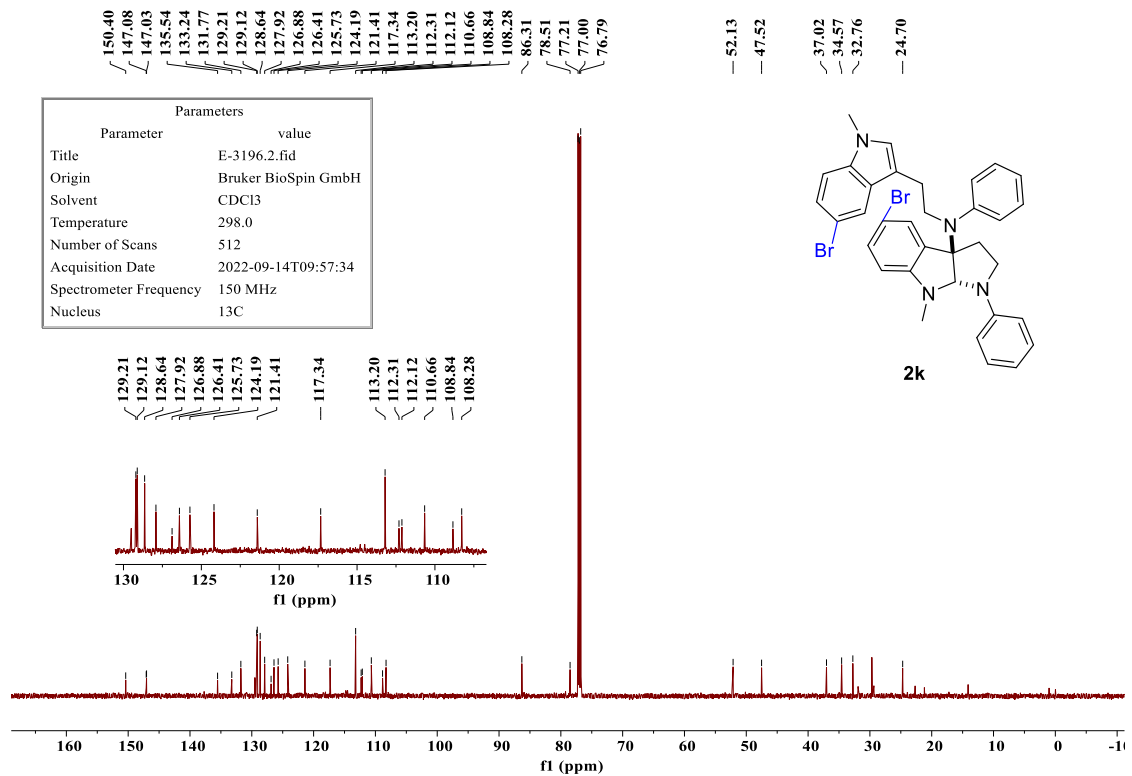

7.261  
7.248  
7.236  
7.205  
7.192  
7.179  
7.142  
7.136  
7.129  
7.121  
7.117  
7.048  
7.036  
7.023  
6.998  
6.986  
6.940  
6.932  
6.829  
6.817  
6.804  
6.709  
6.697  
6.685  
6.639  
6.620  
6.607  
5.198  
3.929  
3.295  
3.089  
3.076  
3.064  
3.051  
2.907  
2.897  
2.582  
2.574  
2.569  
2.565  
2.550  
2.546  
2.471  
2.460  
2.446  
2.433  
2.421  
2.408  
2.396  
2.348  
2.340  
2.328  
1.339  
1.327  
1.314  
1.024  
0.999

| Parameters             |                     |
|------------------------|---------------------|
| Parameter              | value               |
| Title                  | Ra-462.1.fid        |
| Origin                 | Bruker BioSpin GmbH |
| Solvent                | CDCl3               |
| Temperature            | 298.0               |
| Number of Scans        | 8                   |
| Acquisition Date       | 2022-01-10T22:02:14 |
| Spectrometer Frequency | 600 MHz             |
| Nucleus                | 1H                  |

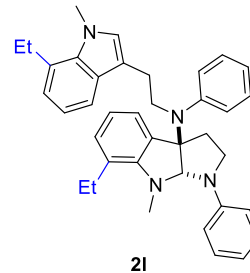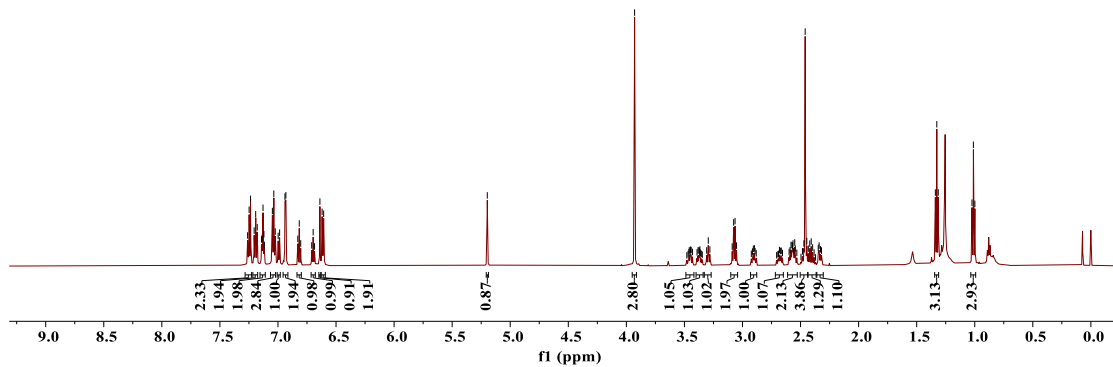

152.12  
148.46  
146.57  
134.78  
132.55  
129.55  
129.38  
129.21  
128.82  
128.71  
128.56  
128.49  
128.49  
127.73  
125.39  
122.33  
121.87  
120.44  
120.44  
119.00  
116.90  
116.64  
114.00  
112.58  
89.71  
78.74  
77.21  
77.00  
76.79  
51.99  
46.41  
40.88  
36.39  
35.84  
25.44  
25.11  
24.68  
16.67  
13.81

| Parameters             |                     |
|------------------------|---------------------|
| Parameter              | value               |
| Title                  | Ra-462.2.fid        |
| Origin                 | Bruker BioSpin GmbH |
| Solvent                | CDCl3               |
| Temperature            | 298.0               |
| Number of Scans        | 800                 |
| Acquisition Date       | 2022-01-12T18:03:35 |
| Spectrometer Frequency | 150 MHz             |
| Nucleus                | 13C                 |

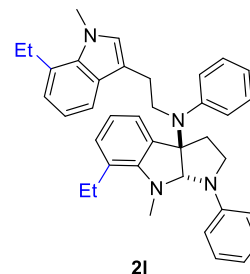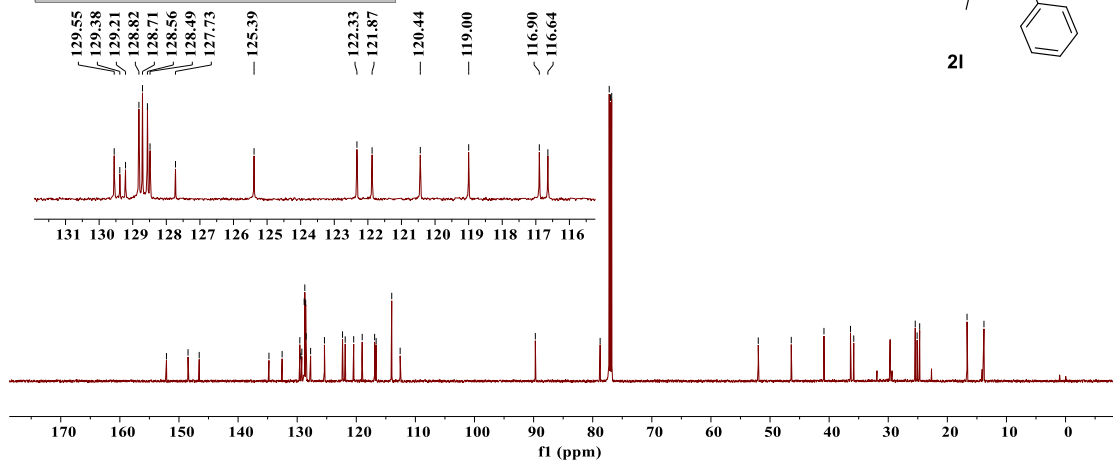

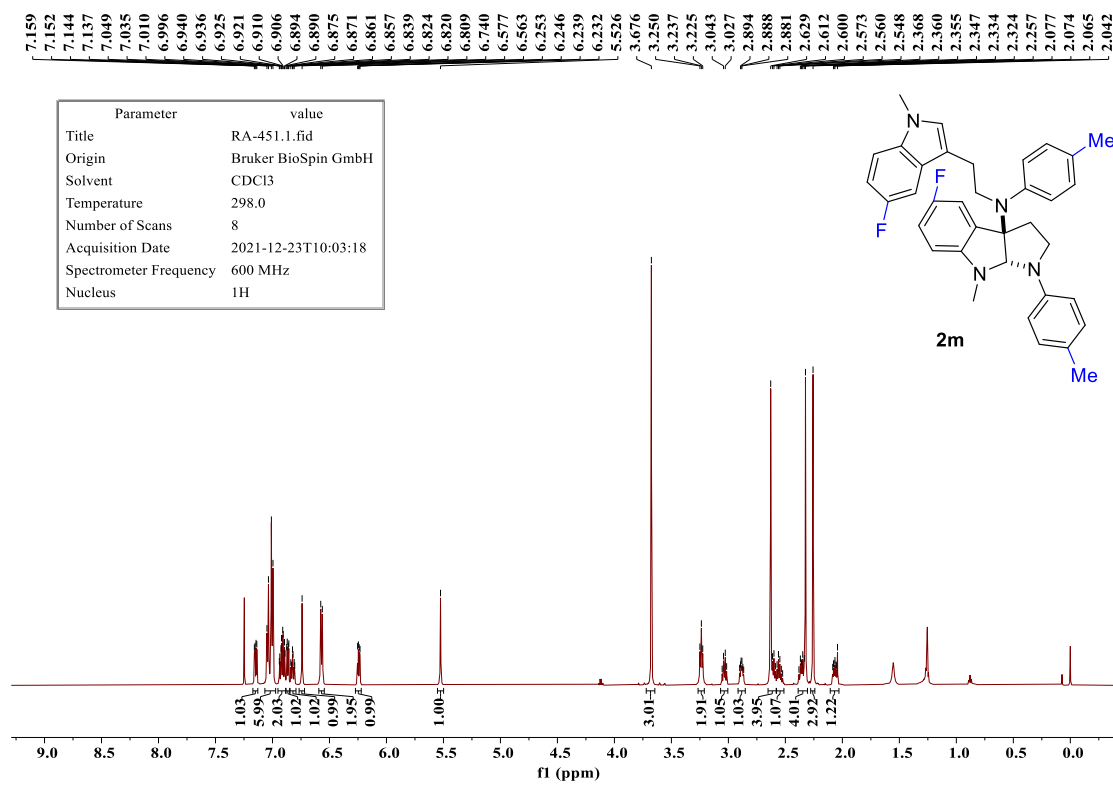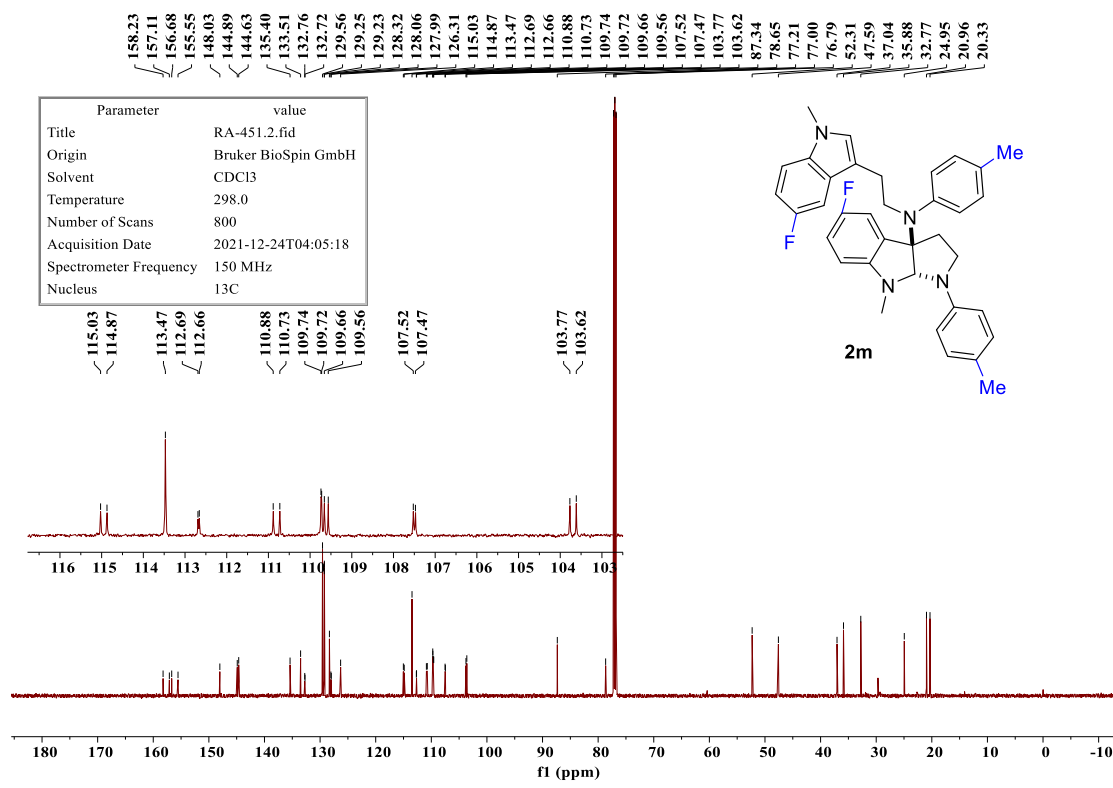

| Parameter              | value               |
|------------------------|---------------------|
| Title                  | RA-451.3.fid        |
| Origin                 | Bruker BioSpin GmbH |
| Solvent                | CDCl3               |
| Temperature            | 297.9               |
| Number of Scans        | 16                  |
| Acquisition Date       | 2021-12-24T04:06:55 |
| Spectrometer Frequency | 565 MHz             |
| Nucleus                | 19F                 |

~ -125.905  
~ -127.379

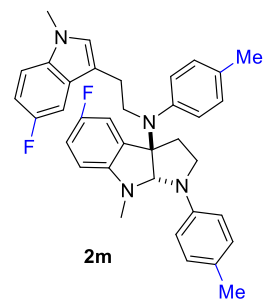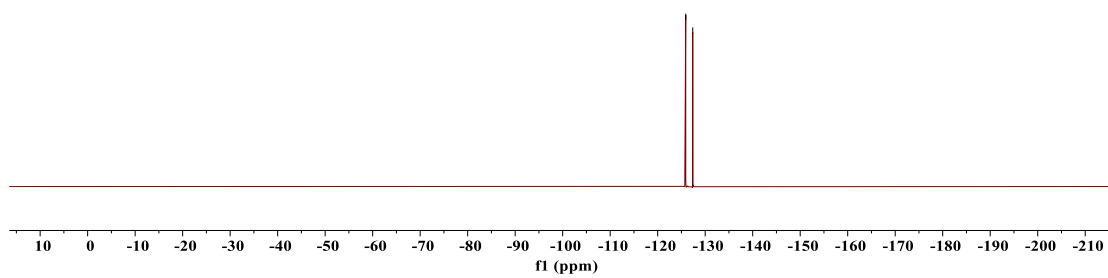

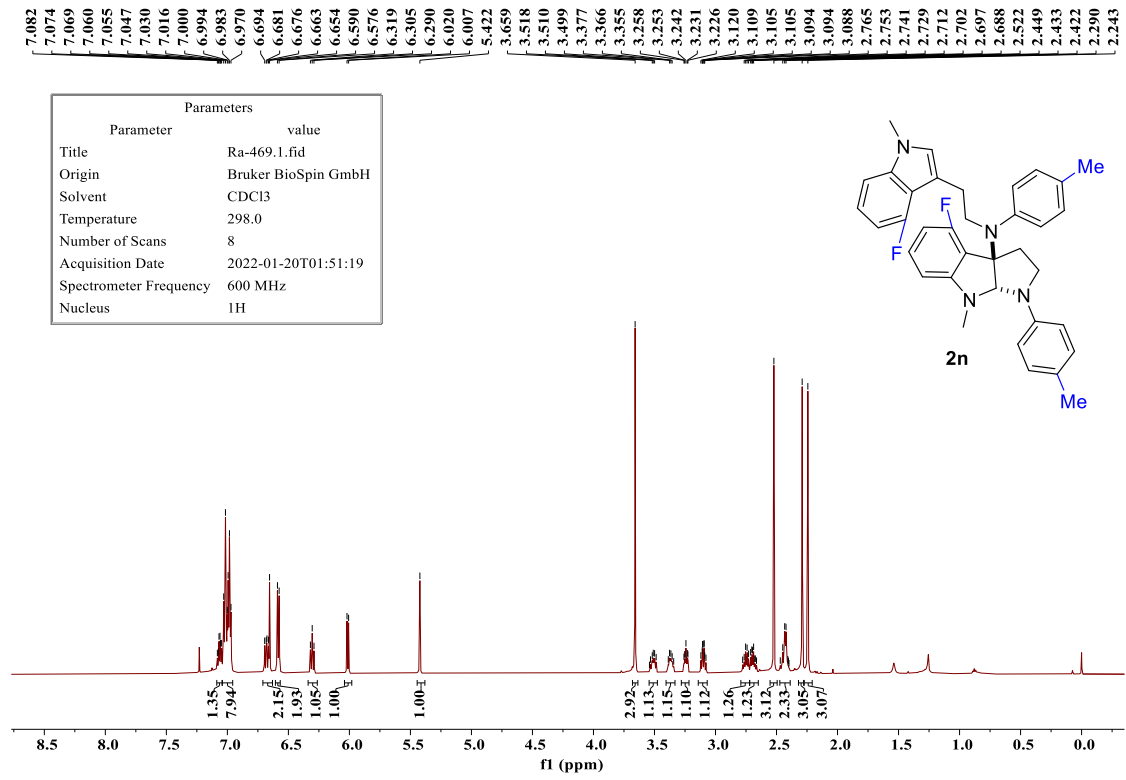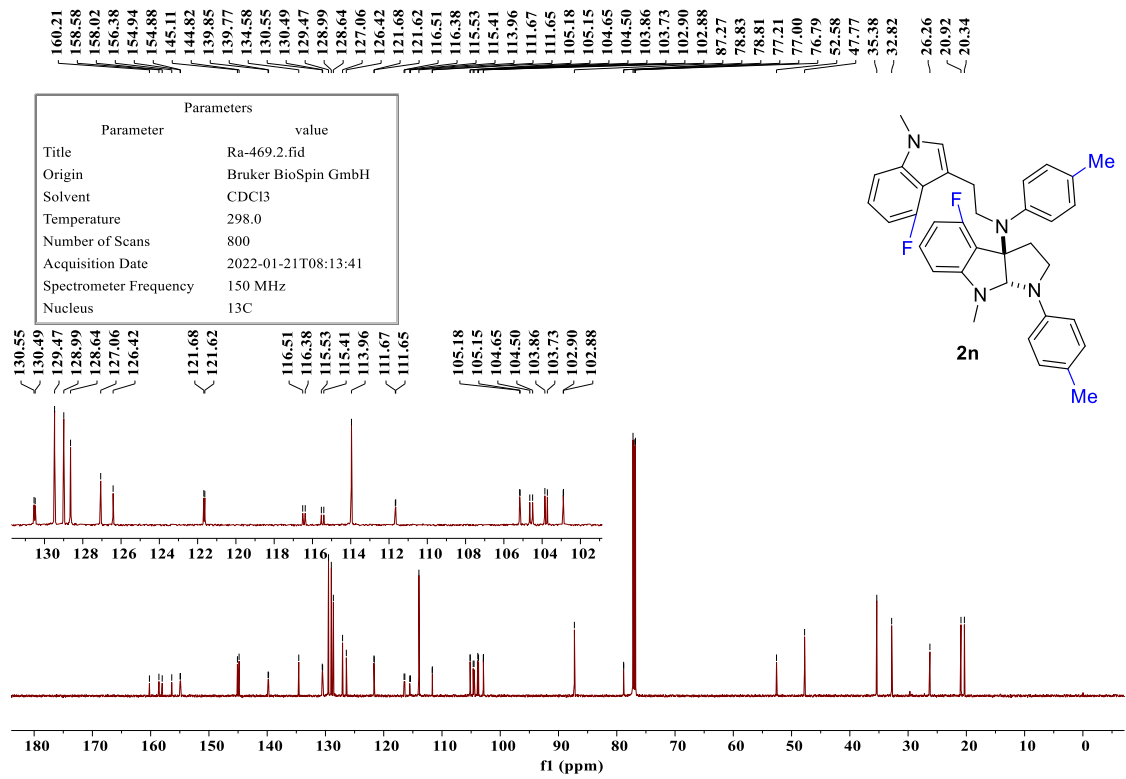

| Parameters             |                     |
|------------------------|---------------------|
| Parameter              | value               |
| Title                  | Ra-469.3.fid        |
| Origin                 | Bruker BioSpin GmbH |
| Solvent                | CDCl3               |
| Temperature            | 297.9               |
| Number of Scans        | 16                  |
| Acquisition Date       | 2022-01-21T08:15:13 |
| Spectrometer Frequency | 565 MHz             |
| Nucleus                | <sup>19</sup> F     |

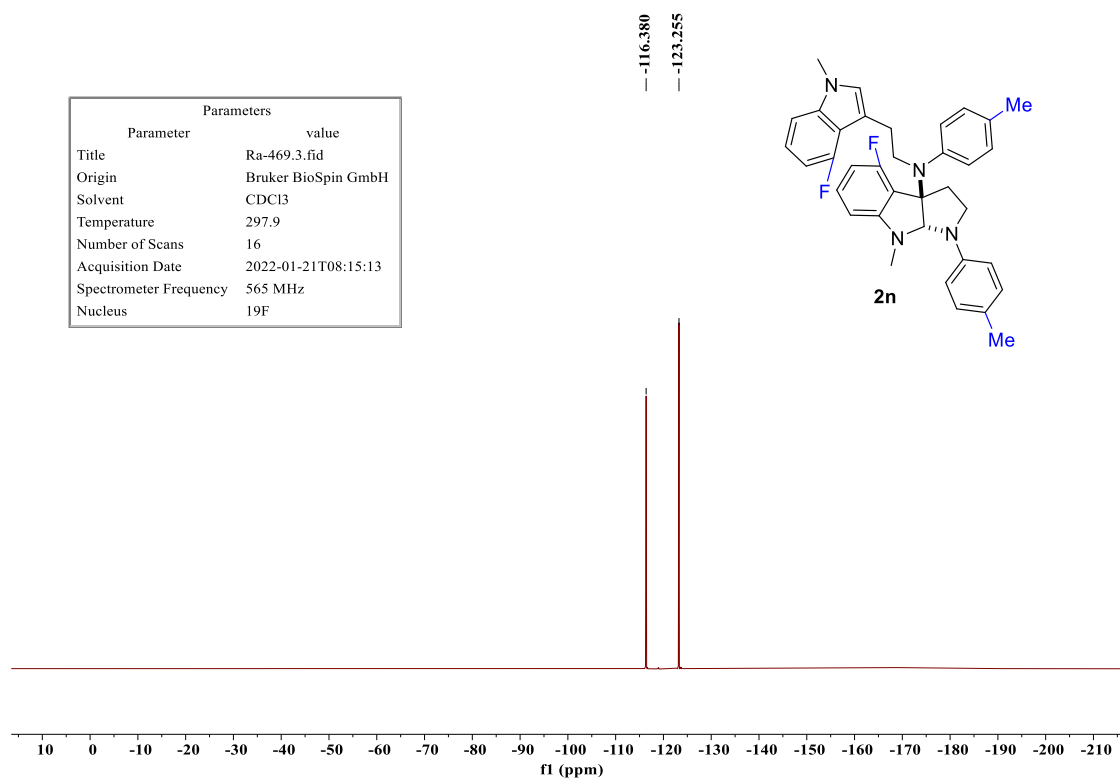

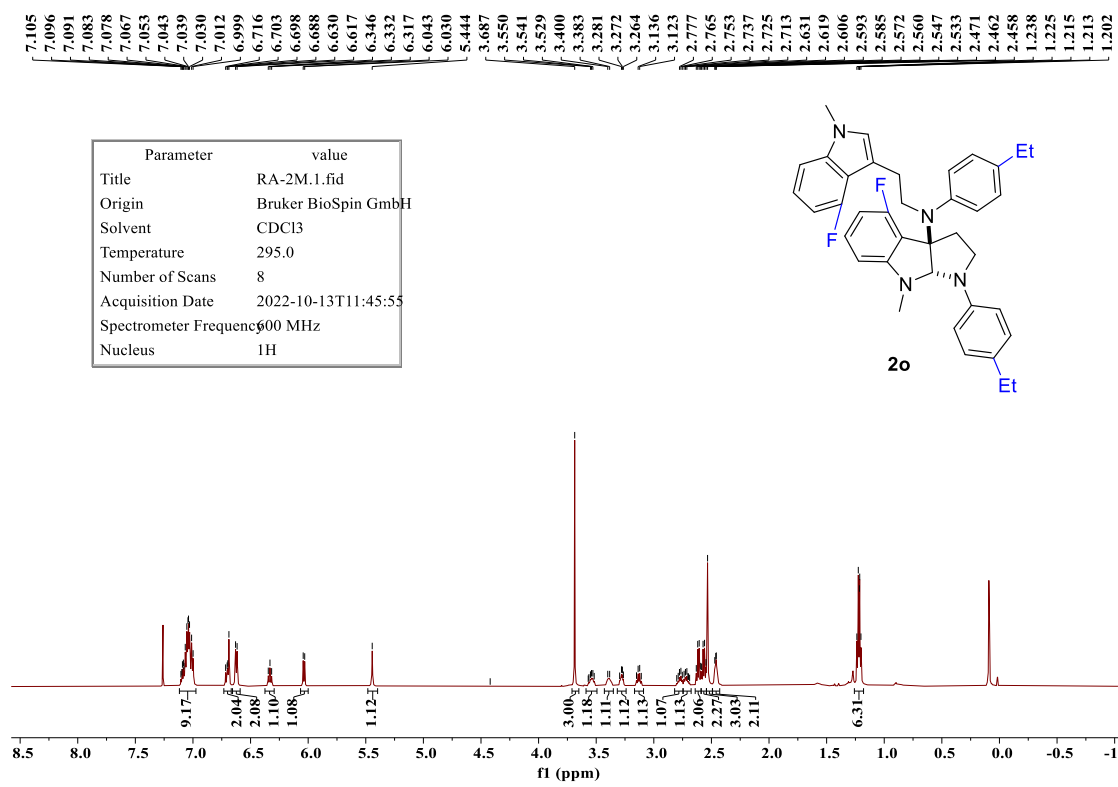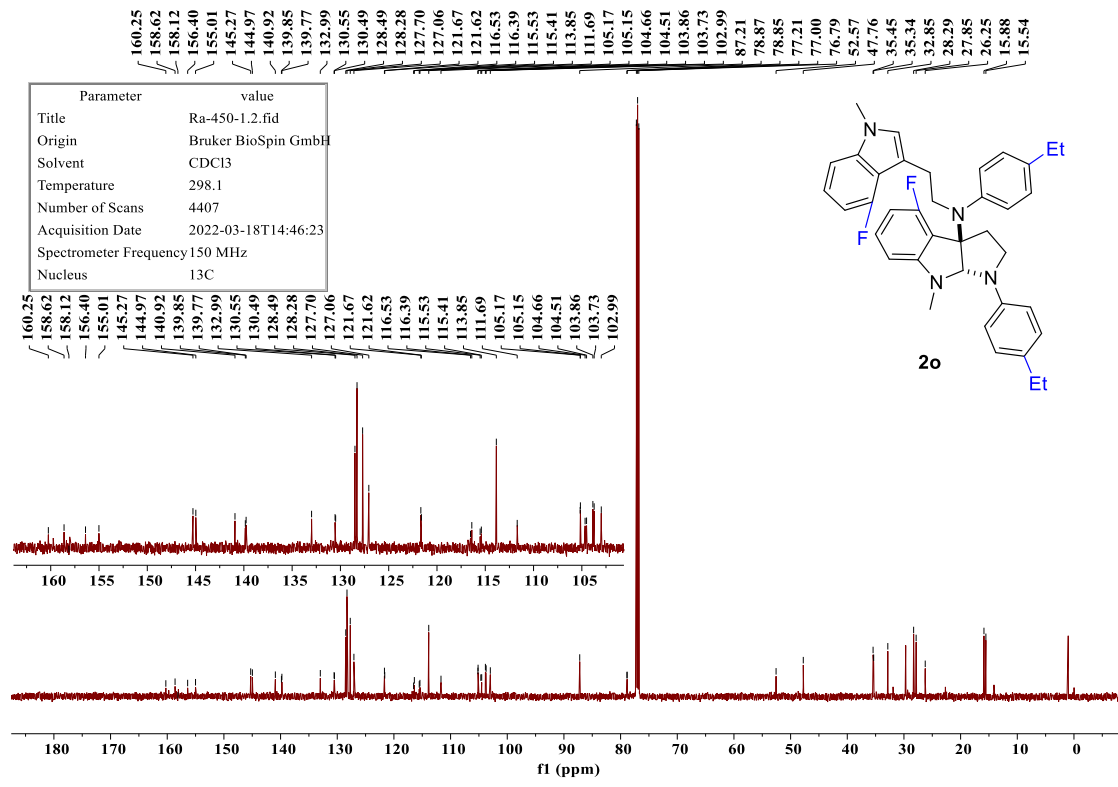

| Parameters             |                     |
|------------------------|---------------------|
| Parameter              | value               |
| Title                  | Ra-450-1-F.I.1.r    |
| Origin                 | Bruker BioSpin GmbH |
| Solvent                | CDCl3               |
| Temperature            | 298.2               |
| Number of Scans        | 16                  |
| Acquisition Date       | 2022-03-11T23:05:27 |
| Spectrometer Frequency | 565 MHz             |
| Nucleus                | 19F                 |

--116.47

--123.28

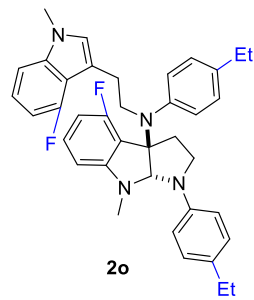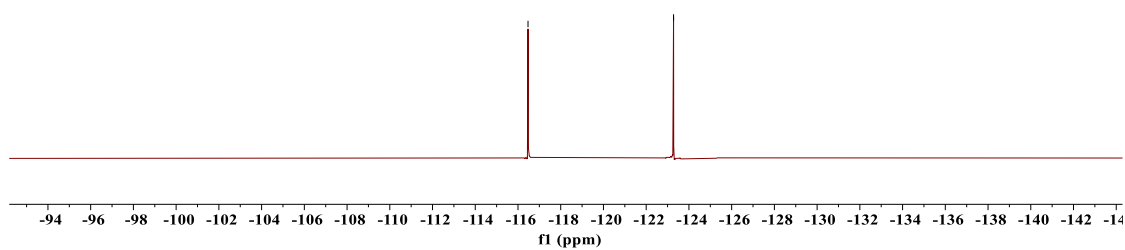



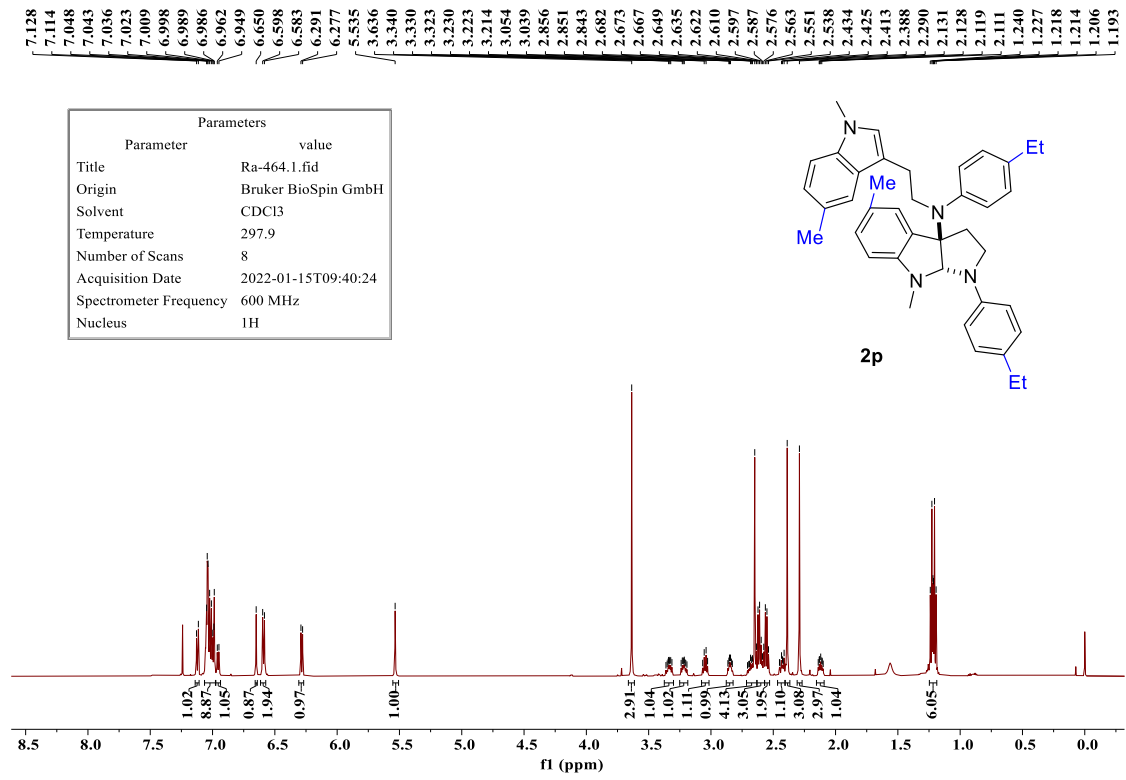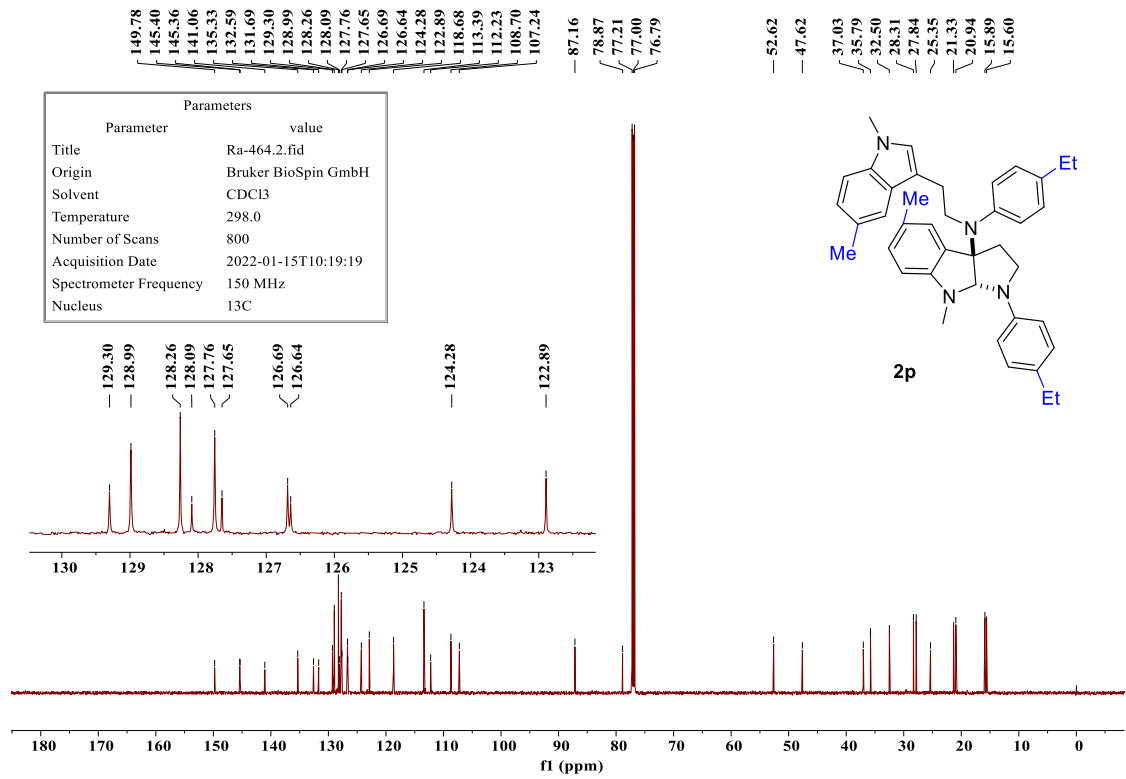

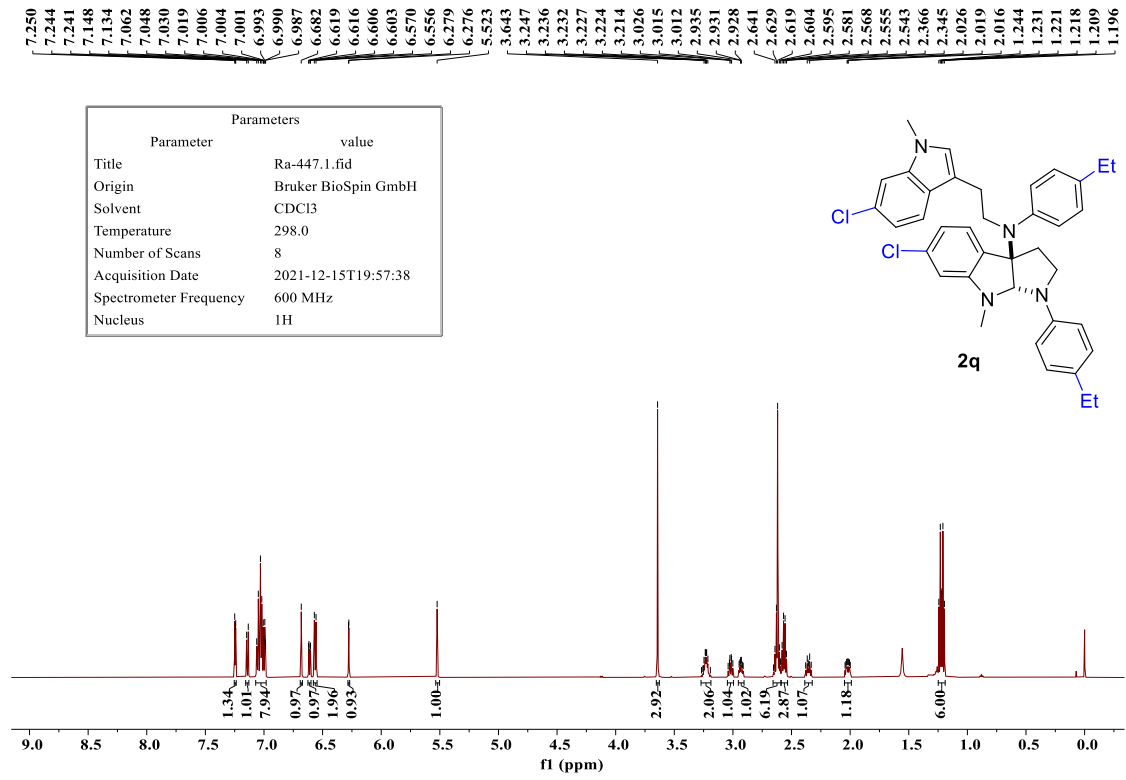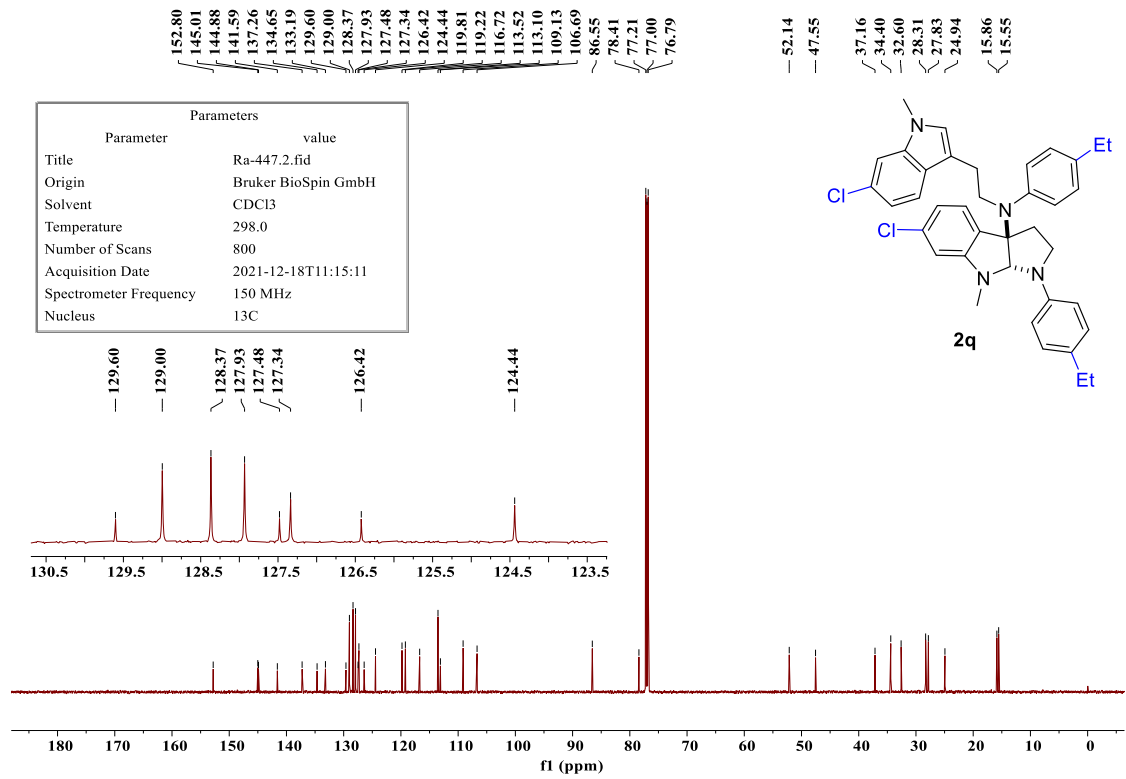

7.249  
7.238  
7.229  
7.210  
7.197  
7.185  
7.157  
7.145  
7.127  
7.107  
7.095  
7.064  
7.036  
7.023  
7.011  
7.003  
6.990  
6.977  
6.918  
6.906  
6.754  
6.701  
6.689  
6.676  
6.656  
6.644  
6.632  
6.551  
6.538  
6.238  
6.225  
5.877  
5.205  
4.384  
4.355  
4.125  
4.097  
3.476  
3.465  
3.332  
3.325  
3.318  
3.166  
3.152  
3.033  
3.025  
2.733  
2.723  
2.718  
2.643  
2.633  
2.629  
2.478  
2.469  
2.458  
2.227  
2.216

| Parameters             |                     |
|------------------------|---------------------|
| Parameter              | value               |
| Title                  | Ra-375.1.fid        |
| Origin                 | Bruker BioSpin GmbH |
| Solvent                | CDCl3               |
| Temperature            | 298.0               |
| Number of Scans        | 8                   |
| Acquisition Date       | 2022-01-24T00:27:46 |
| Spectrometer Frequency | 600 MHz             |
| Nucleus                | 1H                  |

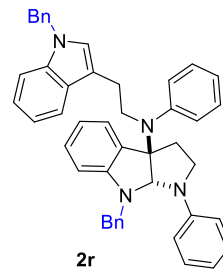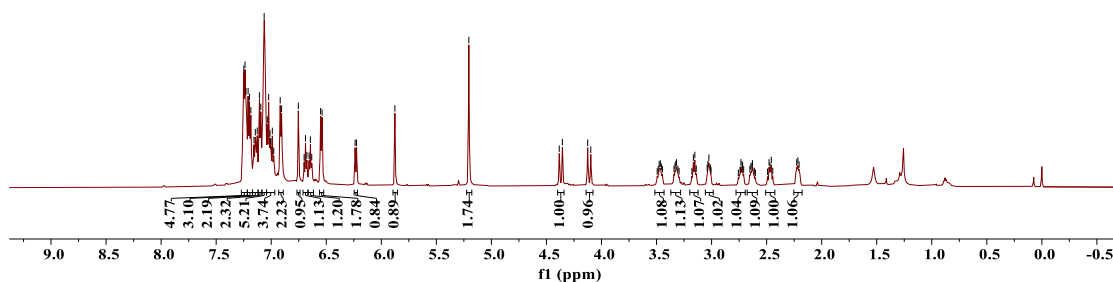

151.19  
147.92  
147.37  
138.82  
137.76  
136.57  
130.71  
129.19  
129.04  
128.99  
128.66  
128.57  
128.20  
128.14  
127.46  
126.76  
126.67  
126.51  
125.91  
125.41  
123.87  
121.54  
119.09  
118.83  
117.25  
117.19  
113.40  
113.33  
113.33  
109.49  
106.49  
84.42  
79.24  
77.21  
77.00  
76.79  
52.49  
50.01  
49.75  
47.46  
38.01  
25.37

| Parameters             |                     |
|------------------------|---------------------|
| Parameter              | value               |
| Title                  | Ra-375.2.fid        |
| Origin                 | Bruker BioSpin GmbH |
| Solvent                | CDCl3               |
| Temperature            | 298.0               |
| Number of Scans        | 800                 |
| Acquisition Date       | 2022-01-24T01:06:50 |
| Spectrometer Frequency | 150 MHz             |
| Nucleus                | 13C                 |

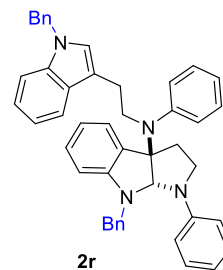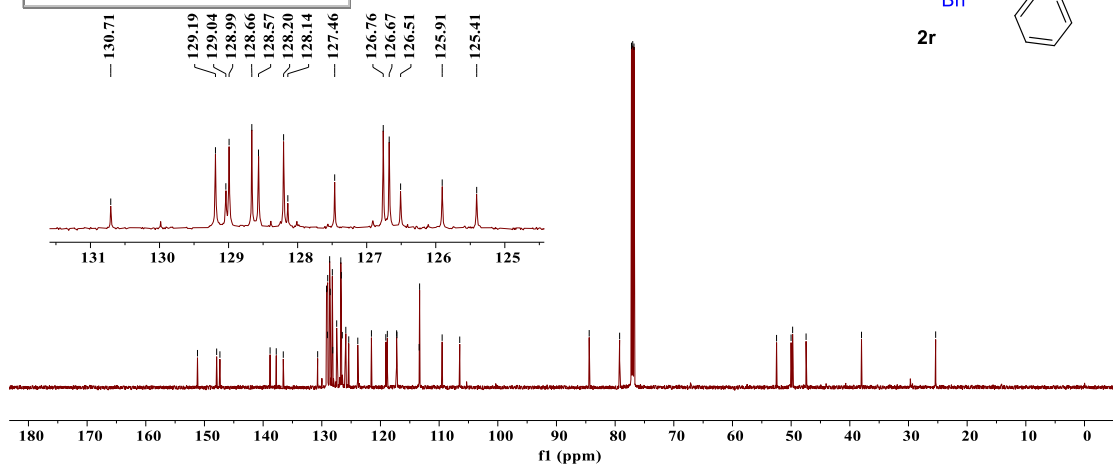

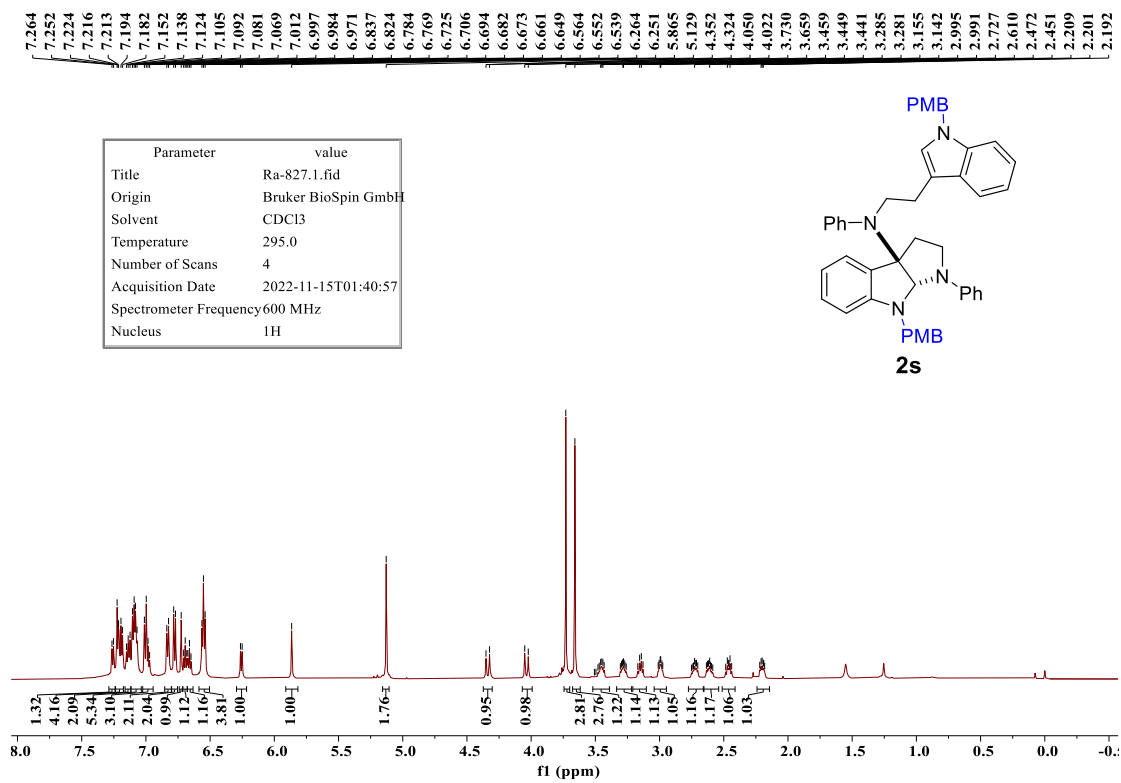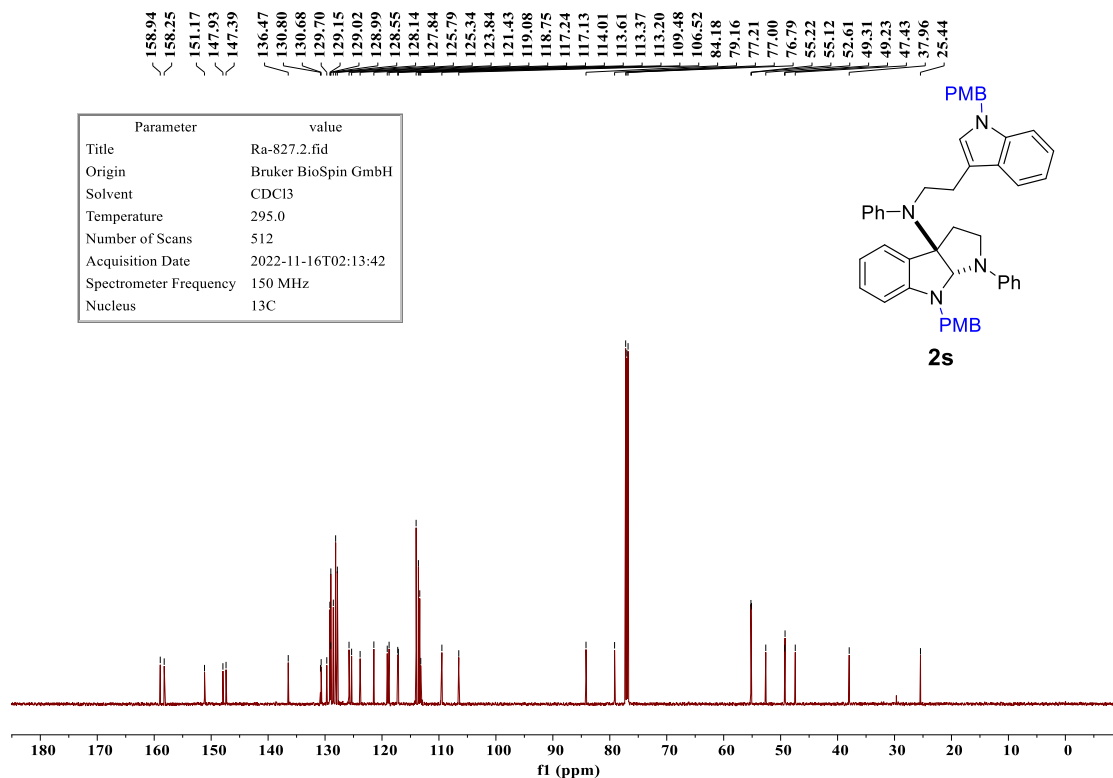

7.265  
7.255  
7.236  
7.232  
7.217  
7.203  
7.195  
7.190  
7.182  
7.169  
7.153  
7.142  
7.131  
7.124  
7.112  
7.098  
7.018  
7.006  
6.993  
6.743  
6.724  
6.712  
6.695  
6.683  
6.676  
6.662  
6.348  
6.335  
5.837  
5.157  
5.154  
5.140  
5.137  
5.069  
5.066  
5.041  
5.038  
5.010  
5.007  
4.981  
4.978  
4.968  
4.965  
4.950  
4.948  
4.619  
4.610  
3.759  
3.755  
3.570  
3.560  
3.122  
3.119  
3.106  
2.633  
2.494  
2.473  
2.196

| Parameters             |  |                     |
|------------------------|--|---------------------|
| Parameter              |  | value               |
| Title                  |  | Ra-374.1.fid        |
| Origin                 |  | Bruker BioSpin GmbH |
| Solvent                |  | CDCl3               |
| Temperature            |  | 298.0               |
| Number of Scans        |  | 8                   |
| Acquisition Date       |  | 2022-01-24T02:00:28 |
| Spectrometer Frequency |  | 600 MHz             |
| Nucleus                |  | 1H                  |

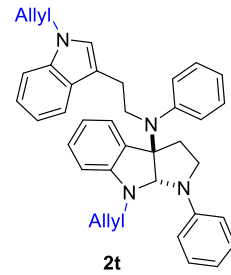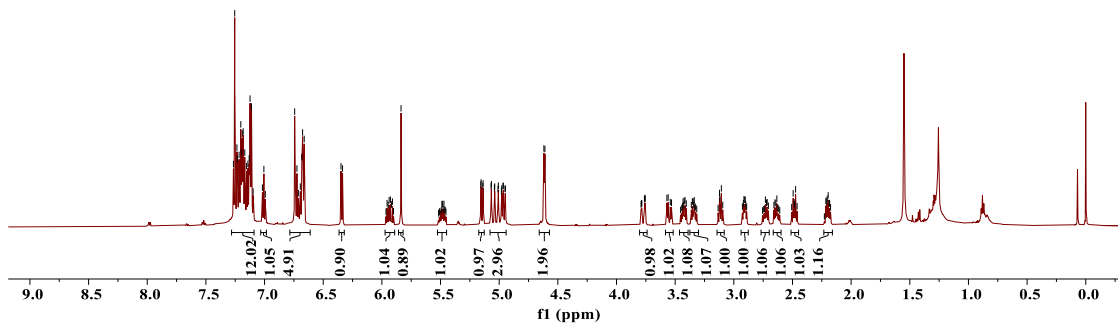

150.44  
147.90  
147.36  
136.28  
134.06  
133.66  
130.99  
129.09  
129.03  
128.89  
128.51  
128.10  
125.52  
125.29  
123.68  
121.36  
119.04  
118.68  
117.26  
117.12  
117.07  
116.16  
113.46  
113.10  
109.40  
106.72  
84.46  
78.95  
77.21  
77.00  
76.79

52.49  
49.12  
48.58  
47.38  
37.82  
25.32

| Parameters             |  |                     |
|------------------------|--|---------------------|
| Parameter              |  | value               |
| Title                  |  | Ra-374.2.fid        |
| Origin                 |  | Bruker BioSpin GmbH |
| Solvent                |  | CDCl3               |
| Temperature            |  | 298.0               |
| Number of Scans        |  | 800                 |
| Acquisition Date       |  | 2022-01-24T02:39:23 |
| Spectrometer Frequency |  | 150 MHz             |
| Nucleus                |  | 13C                 |

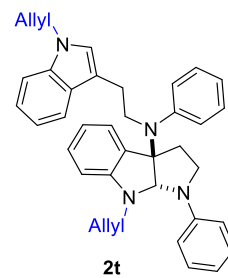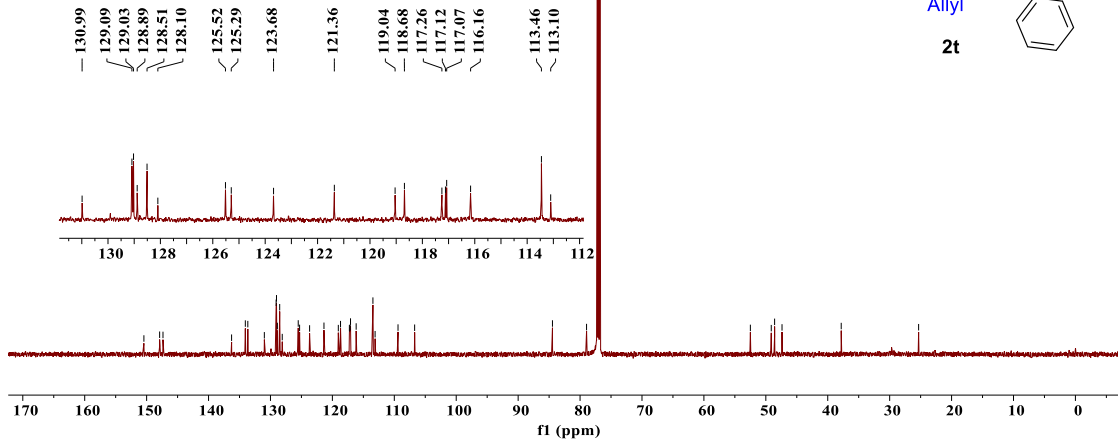

7.271, 7.259, 7.256, 7.250, 7.244, 7.204, 7.201, 7.194, 7.189, 7.182, 6.909, 6.897, 6.862, 6.449, 5.584, 3.541, 3.533, 3.528, 3.525, 3.520, 3.517, 3.513, 3.504, 3.500, 3.360, 3.348, 3.336, 3.332, 3.320, 3.168, 2.895, 2.430, 2.417, 2.409, 2.405, 2.396, 2.384, 2.360, 2.352, 2.349, 2.340, 2.331, 2.328, 2.320

| Parameter              | value               |
|------------------------|---------------------|
| Title                  | ra-847.1.fid        |
| Origin                 | Bruker BioSpin GmbH |
| Solvent                | CDCl3               |
| Temperature            | 295.0               |
| Number of Scans        | 4                   |
| Acquisition Date       | 2022-12-05T09:49:01 |
| Spectrometer Frequency | 600 MHz             |
| Nucleus                | 1H                  |

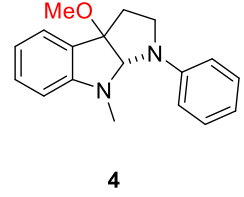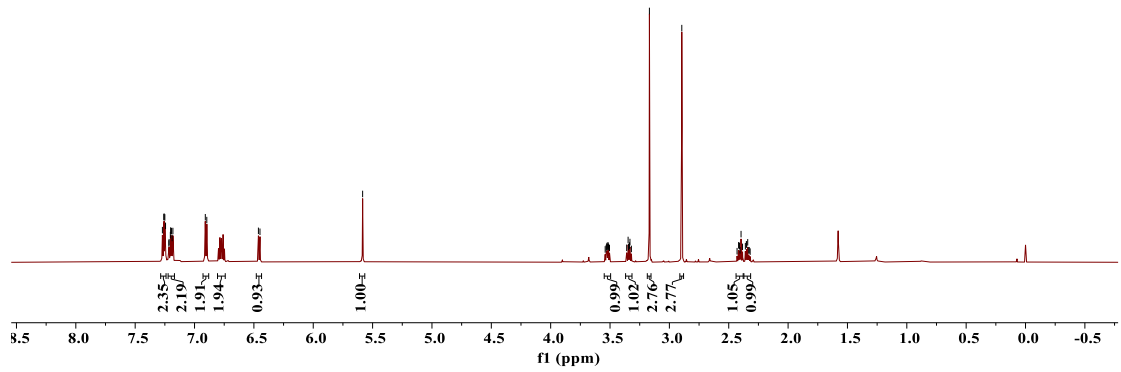

151.99, 147.54, 129.93, 129.14, 126.68, 123.58, 117.80, 117.78, 113.85, 107.31, 93.49, 85.76, 77.21, 77.00, 76.79, 52.89, 47.70, 38.20, 35.16

| Parameter              | value               |
|------------------------|---------------------|
| Title                  | ra-847.2.fid        |
| Origin                 | Bruker BioSpin GmbH |
| Solvent                | CDCl3               |
| Temperature            | 295.0               |
| Number of Scans        | 800                 |
| Acquisition Date       | 2022-12-05T10:28:17 |
| Spectrometer Frequency | 150 MHz             |
| Nucleus                | 13C                 |

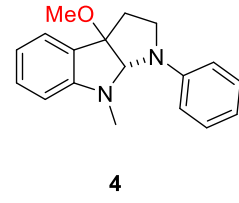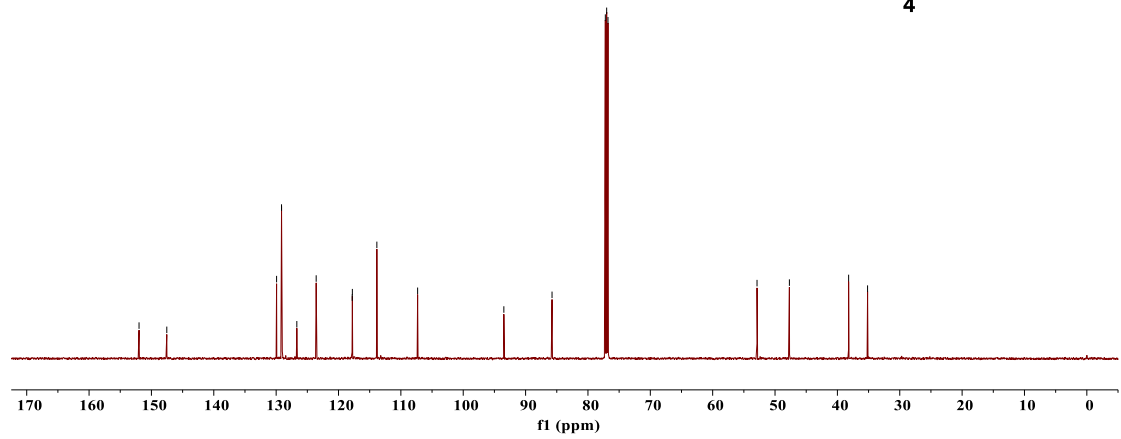

7.330  
7.318  
7.229  
7.216  
7.203  
7.193  
7.167  
7.156  
7.126  
7.115  
7.103  
7.070  
7.056  
7.044  
6.953  
6.940  
6.931  
6.919  
6.907  
6.769  
6.755  
6.741  
6.729  
6.716  
6.411  
6.398  
5.840  
4.427  
4.401  
4.295  
4.270  
3.175  
3.162  
3.148  
3.135  
3.090  
3.083  
3.078  
3.070  
3.063  
3.055  
2.758  
2.699  
2.686  
2.678  
2.673  
2.665  
2.652  
2.302  
2.295  
2.291  
2.283  
2.274  
2.270  
2.263

| Parameter              | value               |
|------------------------|---------------------|
| Title                  | Ra-701-1.1.fid      |
| Origin                 | Bruker BioSpin GmbH |
| Solvent                | CDCl3               |
| Temperature            | 298.0               |
| Number of Scans        | 8                   |
| Acquisition Date       | 2022-09-21T08:47:48 |
| Spectrometer Frequency | 600 MHz             |
| Nucleus                | 1H                  |

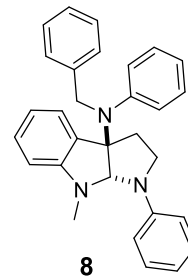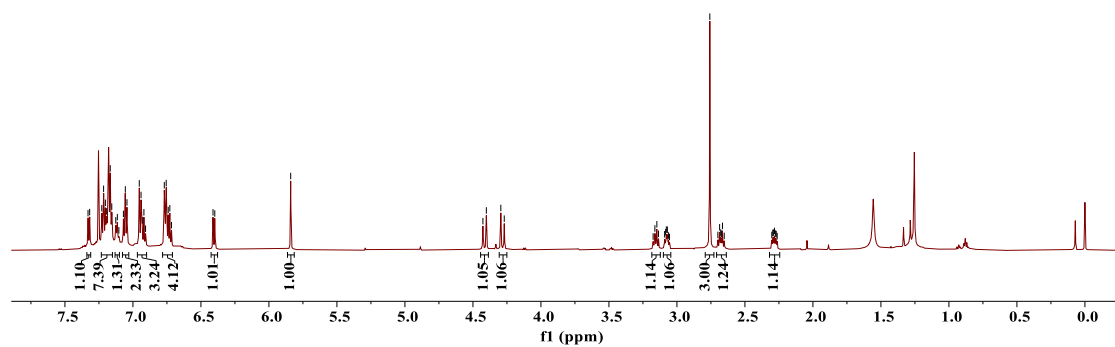

151.61  
148.23  
147.21  
140.07  
130.89  
129.20  
129.09  
128.27  
128.02  
127.80  
126.51  
126.09  
123.64  
123.48  
117.55  
117.44  
113.67  
106.93  
86.39  
78.55  
77.21  
77.00  
76.79  
56.13  
47.23  
37.55  
35.05

| Parameter              | value               |
|------------------------|---------------------|
| Title                  | Ra-701-1.2.1.1r     |
| Origin                 | Bruker BioSpin GmbH |
| Solvent                | CDCl3               |
| Temperature            | 298.0               |
| Number of Scans        | 1004                |
| Acquisition Date       | 2022-09-21T09:36:27 |
| Spectrometer Frequency | 150 MHz             |
| Nucleus                | 13C                 |

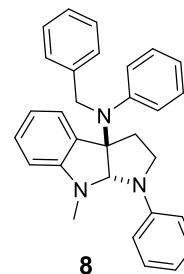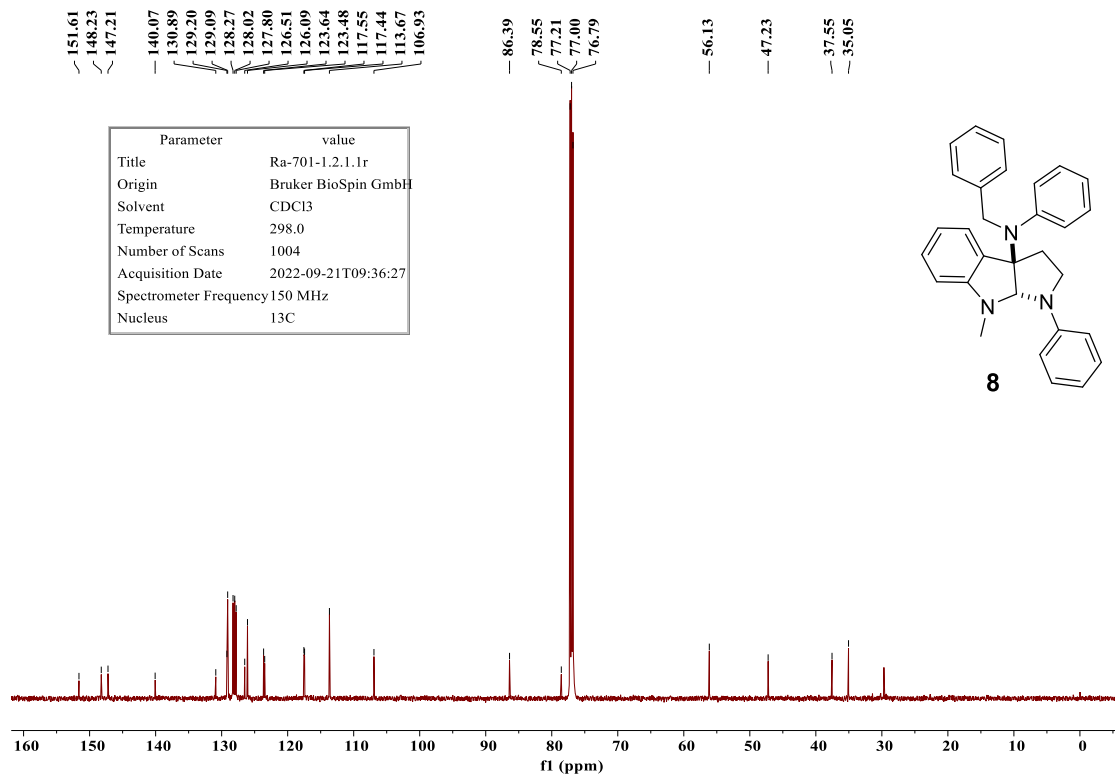

Supplement: d2qo01936a1.pdf [file d2qo01936a1.pdf]
